# Supplementary material for: Supporting the use of theory in cross-country health services research: a participatory qualitative approach using Normalisation Process Theory as an example
Source: PubMed Central journal article supplement — BMJ Open. 2017 Aug 21;7(8):e014289. doi: 10.1136/bmjopen-2016-014289 (PMC5724160; doi:10.1136/bmjopen-2016-014289), 2017-08-21
Supplement: bmjopen-2016-014289.draft_revisions.pdf [file bmjopen-2016-014289.draft_revisions.pdf]

# BMJ Open

## Supporting the use of theory in cross-country health services research: Normalisation Process Theory as an example

|                                 |                                                                                                                                                                                                                                                                                                                                                                                                                                                                                                                                                                                                                                                                                                                                                                                                                                                                                                                                                                                                                                                                                                                                                                                                                                                                                                                                                                                                                                                                                                                                                                                                                                                                                                                                                                                                                                                                                                                                                                                                                           |
|---------------------------------|---------------------------------------------------------------------------------------------------------------------------------------------------------------------------------------------------------------------------------------------------------------------------------------------------------------------------------------------------------------------------------------------------------------------------------------------------------------------------------------------------------------------------------------------------------------------------------------------------------------------------------------------------------------------------------------------------------------------------------------------------------------------------------------------------------------------------------------------------------------------------------------------------------------------------------------------------------------------------------------------------------------------------------------------------------------------------------------------------------------------------------------------------------------------------------------------------------------------------------------------------------------------------------------------------------------------------------------------------------------------------------------------------------------------------------------------------------------------------------------------------------------------------------------------------------------------------------------------------------------------------------------------------------------------------------------------------------------------------------------------------------------------------------------------------------------------------------------------------------------------------------------------------------------------------------------------------------------------------------------------------------------------------|
| Journal:                        | <i>BMJ Open</i>                                                                                                                                                                                                                                                                                                                                                                                                                                                                                                                                                                                                                                                                                                                                                                                                                                                                                                                                                                                                                                                                                                                                                                                                                                                                                                                                                                                                                                                                                                                                                                                                                                                                                                                                                                                                                                                                                                                                                                                                           |
| Manuscript ID                   | bmjopen-2016-014289                                                                                                                                                                                                                                                                                                                                                                                                                                                                                                                                                                                                                                                                                                                                                                                                                                                                                                                                                                                                                                                                                                                                                                                                                                                                                                                                                                                                                                                                                                                                                                                                                                                                                                                                                                                                                                                                                                                                                                                                       |
| Article Type:                   | Research                                                                                                                                                                                                                                                                                                                                                                                                                                                                                                                                                                                                                                                                                                                                                                                                                                                                                                                                                                                                                                                                                                                                                                                                                                                                                                                                                                                                                                                                                                                                                                                                                                                                                                                                                                                                                                                                                                                                                                                                                  |
| Date Submitted by the Author:   | 15-Sep-2016                                                                                                                                                                                                                                                                                                                                                                                                                                                                                                                                                                                                                                                                                                                                                                                                                                                                                                                                                                                                                                                                                                                                                                                                                                                                                                                                                                                                                                                                                                                                                                                                                                                                                                                                                                                                                                                                                                                                                                                                               |
| Complete List of Authors:       | <p>O'Donnell, Kate; University of Glasgow, General Practice &amp; Primary Care<br/> Mair, Frances; University of Glasgow, General Practice and Primary Care<br/> Dowrick, CF; University of Liverpool, Institute of Psychology, Health and Society<br/> O'Reillyde Brun, Mary; NUI Galway, Discipline of General Practice<br/> de Brún, Tomas; NUI Galway, Discipline of General Practice<br/> Burns, Nicola; University of Glasgow, General Practice and Primary Care,<br/> Institute of Health &amp; Wellbeing, College of Medical, Veterinary and Life<br/> Sciences; Lancaster University, Lancaster Medical School, Faculty of Health<br/> and Medicine, Furness College<br/> Lionis, Christos; Medical Faculty, University of Crete, Greece,<br/> Saridaki, Aristeia; Medical Faculty, University of Crete, Greece<br/> Papadakaki, Maria; Technological Educational Institute of Crete,<br/> Department of Social Work; Medical Faculty, University of Crete, Greece<br/> van den Muijsenbergh, Maria; Radboud University Nijmegen Medical<br/> Centre, Department of Primary and Community Care; Pharos Centre of<br/> Expertise on Health Disparities<br/> van Weel-Baumgarten, Evelyn; Radboud University Nijmegen Medical<br/> Centre, Department of Primary and Community Care<br/> Gravenhorst, Katja; University of Liverpool, Institute of Psychology, Health<br/> and Society<br/> Cooper, Lucy<br/> Princz, Christine; Medical University of Vienna, Centre for Public Health<br/> Teunissen, Erik; Radboud university medical center, Department of Primary<br/> and Community Care, Nijmegen, Netherlands<br/> van den Driessen Mareeuw, Francine; Radboud university medical center,<br/> Department of Primary and Community Care, Nijmegen, Netherlands<br/> Vlachadi, Maria; University of Crete, Department of Political Sciences<br/> Spiegel, Wolfgang; Medical University of Vienna, Centre for Public Health<br/> Macfarlane, Anne; University of Limerick, Graduate Entry Medical School</p> |
| <b>Primary Subject Heading</b>: | Health services research                                                                                                                                                                                                                                                                                                                                                                                                                                                                                                                                                                                                                                                                                                                                                                                                                                                                                                                                                                                                                                                                                                                                                                                                                                                                                                                                                                                                                                                                                                                                                                                                                                                                                                                                                                                                                                                                                                                                                                                                  |
| Secondary Subject Heading:      | Research methods, Qualitative research                                                                                                                                                                                                                                                                                                                                                                                                                                                                                                                                                                                                                                                                                                                                                                                                                                                                                                                                                                                                                                                                                                                                                                                                                                                                                                                                                                                                                                                                                                                                                                                                                                                                                                                                                                                                                                                                                                                                                                                    |
| Keywords:                       | Theory, Training, Health services research, Normalisation Process Theory                                                                                                                                                                                                                                                                                                                                                                                                                                                                                                                                                                                                                                                                                                                                                                                                                                                                                                                                                                                                                                                                                                                                                                                                                                                                                                                                                                                                                                                                                                                                                                                                                                                                                                                                                                                                                                                                                                                                                  |
|                                 |                                                                                                                                                                                                                                                                                                                                                                                                                                                                                                                                                                                                                                                                                                                                                                                                                                                                                                                                                                                                                                                                                                                                                                                                                                                                                                                                                                                                                                                                                                                                                                                                                                                                                                                                                                                                                                                                                                                                                                                                                           |

1  
2  
3  
4  
5  
6  
7  
8  
9  
10  
11  
12  
13  
14  
15  
16  
17  
18  
19  
20  
21  
22  
23  
24  
25  
26  
27  
28  
29  
30  
31  
32  
33  
34  
35  
36  
37  
38  
39  
40  
41  
42  
43  
44  
45  
46  
47  
48  
49  
50  
51  
52  
53  
54  
55  
56  
57  
58  
59  
60

SCHOLARONE™  
Manuscripts

For peer review only

## Supporting the use of theory in cross-country health services research: Normalisation Process

### Theory as an example

Catherine A O'Donnell<sup>1\*</sup>, Frances S Mair<sup>1</sup>, Christopher Dowrick<sup>2</sup>, Mary O'Reilly-de Brún<sup>3</sup>, Tomas de Brún<sup>3</sup>, Nicola Burns<sup>1,4</sup>, Christos Lionis<sup>5</sup>, Aristoula Saridaki<sup>5</sup>, Maria Papadakaki<sup>5,6</sup>, Maria van den Muijsenbergh<sup>7,8</sup>, Evelyn van Weel-Baumgarten<sup>7</sup>, Katja Gravenhorst<sup>2</sup>, Lucy Cooper<sup>2</sup>, Christine Princz<sup>9</sup>, Erik Teunissen<sup>7</sup>, Francine van den Driessen Mareeuw<sup>7</sup>, Maria Vlahadi<sup>5</sup>, Wolfgang Spiegel<sup>9</sup>,  
and Anne MacFarlane<sup>10</sup>

1. General Practice and Primary Care, Institute of Health and Wellbeing, College of MVLS, University of Glasgow, 1 Horselethill Road, Glasgow, Scotland, G12 9LX, UK
2. Institute of Psychology, Health and Society, University of Liverpool, Waterhouse Building, Block B, 1st Floor, 1-5 Brownlow Street, Liverpool, L69 3GL, UK
3. Discipline of General Practice, School of Medicine, National University of Ireland, Galway, Ireland
4. Faculty of Health and Medicine, Lancaster Medical School, Furness College, University of Lancaster, Lancaster, UK
5. Faculty of Medicine, University of Crete, Heraklion, Greece
6. Department of Social Work, School of Health and Social Welfare, Technological Educational Institute of Crete, Heraklion, Crete
7. Department of Primary and Community Care, Radboud University Nijmegen Medical Centre, Nijmegen, The Netherlands
8. Pharos Centre of Expertise on Health Disparities, Utrecht, The Netherlands
9. Centre for Public Health, Medical University of Vienna, Vienna, Austria
10. Graduate Entry Medical School, University of Limerick, Limerick, Ireland

**\*Corresponding Author**

**Email: Kate.O'Donnell@glasgow.ac.uk; Tel: +44 141 330 8329.**

1  
2  
3  
4  
5  
6  
7  
8  
9  
10  
11  
12  
13  
14  
15  
16  
17  
18  
19  
20  
21  
22  
23  
24  
25  
26  
27  
28  
29  
30  
31  
32  
33  
34  
35  
36  
37  
38  
39  
40  
41  
42  
43  
44  
45  
46  
47  
48  
49  
50  
51  
52  
53  
54  
55  
56  
57  
58  
59  
60

For peer review only

## Abstract

**Objectives:** To describe and reflect on the process of designing and delivering a training programme supporting the use of a theoretical framework, Normalisation Process Theory (NPT), in a multi-site health services research study.

**Design:** Participatory research approach utilising qualitative methods.

**Setting:** Six European primary care settings involving research teams from Austria, England, Greece, Ireland, The Netherlands and Scotland.

**Participants:** RESTORE research team consisting 8 project applicants, all senior primary care academics; 10 researchers. Professional backgrounds included 7 academic general practitioners; 4 social/cultural anthropologists; 4 sociologists; 3 health services/primary care researchers.

**Primary outcome measures:** Views of research team assessed using qualitative evaluation methods, analysed thematically by the trainers after each session.

**Results:** Most of the team had no experience of using NPT and many had not applied a theoretical framework to prospective, qualitative projects. Early training proved didactic and overloaded participants with information. Drawing on the methodological approach Participatory Learning and Action, workshops using role play, experiential interactive exercises and light-hearted examples not directly related to the study subject matter were developed. Evaluation showed the study team quickly grew in knowledge and confidence in applying theory to fieldwork.

Recommendations applicable to other studies include: accepting that theory application is not a linear process; that time is needed to address researcher concerns with the process; and that experiential, interactive learning is a key device in building conceptual and practical knowledge. An unanticipated benefit was the smooth transition to cross-country qualitative coding of study data.

**Conclusion** A structured programme of training enhanced and supported the prospective application of a theory, NPT, to our work, but raised challenges. These were not unique to NPT, but

1  
2  
3  
4  
5  
6  
7  
8  
9  
10  
11  
12  
13  
14  
15  
16  
17  
18  
19  
20  
21  
22  
23  
24  
25  
26  
27  
28  
29  
30  
31  
32  
33  
34  
35  
36  
37  
38  
39  
40  
41  
42  
43  
44  
45  
46  
47  
48  
49  
50  
51  
52  
53  
54  
55  
56  
57  
58  
59  
60

could arise with any theoretical framework, especially in large multi-site projects. The lessons learned could be applied by future research teams carrying out other theoretically-informed studies.

**Keywords**

Theory; Health services research; Training; Normalisation Process Theory.

For peer review only

### Strengths and Limitations

The use of theory in health services research can increase the validity and rigor of the research being conducted.

There is a lack of explicit guidance and materials to help researchers apply theory to health services research projects.

This is a particular issue when the research is based across multiple countries with different languages and cultural understandings of the theoretical constructs being described.

The experience of clinical and non-clinical researchers were utilised to inform the on-going development of training to enhance the use of NPT.

The lessons learned are generic and can be applied to the development of training to support other theoretical frameworks.

## Introduction

Bridging the research to practice gap is a recognised problem in health services research.<sup>12</sup> One important solution is to underpin such research with strong theoretical approaches.<sup>134</sup> Advantages include providing a framework that is generalizable across settings and individuals; incremental generation of knowledge; and a guide for analysis.<sup>356</sup> Theory can also enhance our understanding of the barriers to research translation and implementation and alert us to the context into which new interventions and services are placed.<sup>6-9</sup> However, many interventions and services are implemented with little or no attention to theory.<sup>35</sup> When theoretical frameworks are used, they often guide analysis rather than inform the design and conduct of the overall study.<sup>51011</sup> This may be due, in part, to some recognised challenges in applying theory to health services research.

## Challenges in using theory in health services research

The first challenge is a lack of conceptual clarity as to what a “theory” is. MacDonald describes theory as “an organized, heuristic, coherent, and systematic articulation of a set of statements related to significant questions ..... providing a generalizable form of understanding”.<sup>12</sup> There are three recognised levels of “theory”. Grand theory is abstract and broadly applicable across different areas and subjects.<sup>61213</sup> The next level – mid-range or “big theory” – is less abstract, addressing specific phenomena and concepts that can be incorporated into testable propositions or questions and inform intervention development.<sup>612</sup> The third level, programme theory, is often considered as “small” theory, specifying particular components of an intervention in logic models and explicitly linking a programme’s processes and inputs to its intended outcomes.<sup>614</sup>

The second challenge is to decide which theory best informs the work being conducted. For example, theory can focus on: explaining individual behaviours and responses (e.g. Theory of Planned Behaviour); understanding organisational responses (e.g. Diffusion of Innovation); dissemination (e.g. Streams of Policy Process); or implementation (e.g. Promoting Action on



1  
2  
3 Research Implementation in Health Services or PARIHS).<sup>15</sup> While theoretical choice is informed by  
4  
5 the research, the disciplinary composition and background of the research team is also influential.<sup>16</sup>  
6  
7 <sup>17</sup> Health services research is often multidisciplinary and draws on many fields including sociology,  
8  
9 psychology, biostatistics, health economics and clinical disciplines. This requires teams to  
10  
11 understand and respect each other's theoretical and paradigmatic positions.<sup>3</sup> The final challenge is a  
12  
13 lack of guidance in applying theory to studies.<sup>7 18</sup>  
14  
15

### 16 17 18 19 **The application of theory in practice**

20  
21 Consideration has been given to how research teams could apply theory in practice. For example,  
22  
23 the Reach, Effectiveness, Adoption, Implementation and Maintenance (RE-AIM) framework was  
24  
25 developed for use in the evaluation of public health programmes and interventions but is now  
26  
27 widely applied.<sup>19 20</sup> RE-AIM focuses researchers' attention on: population reach; the intervention's  
28  
29 adoption, implementation and effectiveness; and, finally, on its maintenance in practice.<sup>20</sup> The  
30  
31 developers of Re-AIM have released training and support for other researchers (<http://www.re-aim.hnfe.vt.edu/>).  
32  
33 However, even with such training available, it is not always applied consistently.  
34  
35 Gaglio identified 71 papers published between 1999-2010 that used RE-AIM;<sup>20</sup> of these, "reach" was  
36  
37 the most frequently reported dimension, with "maintenance" reported least often. There was also  
38  
39 variation in the reporting of the individual components of each construct. Most reporting was  
40  
41 quantitative, with little qualitative research to explore how components were used or understood.  
42  
43  
44  
45 Similar results were reported for the PARIHS framework, which describes several interacting  
46  
47 components including clinical and patient experience; local context; culture and leadership; and  
48  
49 facilitation.<sup>21</sup> Again, there was variation in its use across studies, with a lack of detail on the  
50  
51 application of different sub-components to fieldwork.<sup>18 22</sup> Two other reviews examined the  
52  
53 application of the Knowledge to Action (KTA) Framework<sup>23</sup> and Normalisation Process Theory<sup>24</sup> to  
54  
55 implementation studies. In both, the authors found stability in the application of the high level  
56  
57  
58  
59  
60

1  
2  
3 constructs across studies but, again, variation in researchers' attention to the sub-constructs of  
4  
5 each. This lack of "theory fidelity" has been raised in other fields, notably health promotion.<sup>23 25</sup>  
6

7  
8 Translating the constructs of a chosen theory into interventions can be challenging, especially when  
9  
10 applied across multiple research sites.<sup>5 7 23</sup> Research teams must be comfortable and aligned with the  
11  
12 use of the selected theory and in agreement about the meaning and application of its individual  
13  
14 components or constructs. Such challenges are enhanced when teams are working in different  
15  
16 settings, countries and across language as construct understanding and implementation are likely to  
17  
18 be both culturally and context-dependent. This mirrors challenges identified in conducting  
19  
20 qualitative research across different settings.<sup>26</sup> These challenges faced the EU-funded RESTORE  
21  
22 project, a multi-site implementation study across six European countries (Box 1).<sup>27</sup> Focussed on  
23  
24 cross-cultural communication in primary care, the design and analysis of RESTORE was underpinned  
25  
26 throughout by a recognised theoretical framework - Normalisation Process Theory (NPT). However,  
27  
28 the application of theory to a research study was a new concept for many members of the team. As  
29  
30 a result, we had to develop a training programme to familiarise and support the team in this process.  
31  
32  
33  
34  
35  
36  
37  
38  
39  
40  
41  
42  
43  
44  
45  
46  
47  
48  
49  
50  
51  
52  
53  
54  
55  
56  
57  
58  
59  
60

**Box 1. Description of the RESTORE project.**<sup>27</sup>

RESTORE (**RE**search into implementation **ST**rategies to support patients of different **OR**igins and **language background**) was focussed on the implementation of guidance and training initiatives to support cross-cultural consultations in primary care for vulnerable migrant populations: asylum seeking and refugee populations; migrants in low paid employment; and undocumented migrants.<sup>27</sup>

<sup>28</sup> Funded by the EU FP7 Programme, RESTORE aimed to bridge the research-practice gap by collecting empirical data on the selection, co-design and implementation of such interventions in five European primary care settings: Austria, England, Greece, Ireland, and the Netherlands. A sixth partner, Scotland, focused on the policy environment and the health systems of participating countries.<sup>29</sup>

RESTORE used a participatory research approach – Participatory Learning and Action (PLA) – as its over-arching methodological approach, generating rich, in-depth qualitative data.<sup>27 30</sup> This involved a range of stakeholders including primary care practitioners, migrant service users, community interpreters and policy makers. To shape the study approach, facilitate data collection and guide the analysis, a theoretical framework was essential; for this, we selected Normalisation Process Theory (NPT).

Here, we describe and reflect on the process of designing training in the use of a theoretical framework in a multi-site research project. This training aimed to: (i) enhance the team's conceptual clarity about using theory; and (ii) ensure its operationalisation in a consistent and rigorous way across settings and languages. We discuss the challenges this brought, as well as the benefits. Finally, we make recommendations that could be applied to other theoretically-driven health services research located in multiple settings, regardless of the theoretical framework selected.

**Methods**

### RESTORE study design

RESTORE was designed and implemented in three stages over 48 months (Figure 1).<sup>27</sup> Stage 1 identified and recruited key stakeholders in each country, including migrants, community interpreters, primary care practitioners and local policy-makers. An extensive mapping exercise was conducted in each country to identify guidance and training initiatives (G/TIs) supporting inter-cultural communication in primary care<sup>31</sup> and to assess their initial suitability for implementation<sup>31</sup>. Stage 2 focussed on engaging with local stakeholders to review the identified G/TIs and democratically select one for implementation by considering the implementation potential of each G/TI.<sup>32</sup> In Stage 3, the selected G/TI was refined by local stakeholders, implemented, monitored and, where necessary, further refined to improve the chances of sustaining it in routine practice.

INSERT FIGURE 1 HERE.

### The RESTORE Team

The research team included research and clinical disciplines, with a wide range of expertise and knowledge of the chosen theoretical framework (Supplementary File 1). Three country teams (Austria, Greece and the Netherlands) had no experience of using NPT. Four team members (MacFarlane, Mair, Dowrick and O'Donnell) had extensive experience of using NPT<sup>33-36</sup> including applying NPT prospectively to complex interventions.<sup>29 37-39</sup> These four team members thus formed the NPT trainers group, leading the development and delivery of the training reported here.

### Theoretical framework

NPT is a mid-range sociological theory concerned with the work that individuals and organisations have to carry out in order to embed and normalise new, complex ways of working into routine practice.<sup>40 41</sup> It does this by focussing attention on four principal constructs or areas of work:

1  
2  
3 coherence (sense-making work); cognitive participation (engagement work); collective action  
4  
5 (enacting work); and reflexive monitoring (appraisal work). Each construct has its own set of sub-  
6  
7 constructs. Table 1 describes these and identifies the set of NPT-informed questions developed for  
8  
9 use in the RESTORE project.<sup>32 42</sup>  
10

11  
12 NPT has been applied to a range of studies,<sup>24</sup> including guideline implementation,<sup>43 44</sup> treatment  
13  
14 burden in chronic disease<sup>45-47</sup> and evaluating models of care.<sup>8 36</sup> However, training in the use of NPT  
15  
16 was not an explicit feature of these studies.  
17  
18  
19  
20  
21  
22  
23  
24  
25  
26  
27  
28  
29  
30  
31  
32  
33  
34  
35  
36  
37  
38  
39  
40  
41  
42  
43  
44  
45  
46  
47  
48  
49  
50  
51  
52  
53  
54  
55  
56  
57  
58  
59  
60

1  
2  
3  
4  
5  
6  
7  
8  
9  
10  
11  
12  
13  
14  
15  
16  
17  
18  
19  
20  
21  
22  
23  
24  
25  
26  
27  
28  
29  
30  
31  
32  
33  
34  
35  
36  
37  
38  
39  
40  
41  
42  
43  
44  
45  
46  
47  
48  
49

Table 1. NPT constructs and sub-constructs as applied to RESTORE<sup>32 42</sup>

| Coherence                                                                                                      | Cognitive Participation                                                                                             | Collective Action                                                                                                         | Reflexive Monitoring                                                                                                |
|----------------------------------------------------------------------------------------------------------------|---------------------------------------------------------------------------------------------------------------------|---------------------------------------------------------------------------------------------------------------------------|---------------------------------------------------------------------------------------------------------------------|
| Can stakeholders make sense of the intervention?                                                               | Can stakeholders get others involved in implementing the intervention?                                              | What needs to be done to make the intervention work in practice?                                                          | Can the intervention be monitored and evaluated?                                                                    |
| <b>Differentiation:</b><br>Do stakeholders see this as a new way working?                                      | <b>Enrolment:</b><br>Do the stakeholders believe they are the correct people to drive forward the implementation?   | <b>Interactional workability:</b><br>Does the intervention make it easier or harder to complete tasks?                    | <b>Systematisation:</b><br>Will stakeholders be able to judge the effectiveness of the intervention?                |
| <b>Individual specification:</b><br>Do individuals understand what tasks the intervention requires of them?    | <b>Initiation:</b><br>Are they willing and able to engage others in the implementation?                             | <b>Skill set workability:</b><br>Do those implementing the intervention have the correct skills and training for the job? | <b>Individual appraisal:</b><br>How will individuals judge the effectiveness of the intervention?                   |
| <b>Communal specification:</b><br>Do all those involved agree about the purpose of the intervention?           | <b>Activation:</b><br>Can stakeholders identify what tasks and activities are required to sustain the intervention? | <b>Relational integration:</b><br>Do those involved in the implementation have confidence in the new way of working?      | <b>Communal appraisal:</b><br>How will stakeholders collectively judge the effectiveness of the intervention?       |
| <b>Internalisation:</b><br>Do all the stakeholders grasp the potential benefits and value of the intervention? | <b>Legitimation:</b><br>Do they believe it is appropriate for them to be involved in the intervention?              | <b>Contextual integration:</b><br>Do local and national resources and policies support the implementation?                | <b>Reconfiguration:</b><br>Will stakeholders be able to modify the intervention based on evaluation and experience? |

### **Application of theory to the RESTORE study**

As described previously, the RESTORE project was designed in three, inter-related stages (Figure 1). Although not entirely linear, the study was designed to broadly align to the four constructs of NPT (Figure 2). Stage 1 focused on familiarisation, first on the broad need to apply theory to RESTORE and then, with NPT itself. Stage 2 mapped to coherence and cognitive participation; Stage 3 mapped to collective action and reflexive monitoring. This structure then influenced the design of the training for the team, which is now described in detail.

INSERT FIGURE 2 HERE

### **Description of the training programme**

Face-to-face training sessions each lasted one day. Training content was initially developed by the NPT trainers based on our knowledge of the content that needed to be covered. As time progressed, however, the content was developed based on feedback and evaluation from the RESTORE team members. Here we briefly describe the content of the training sessions. More detailed description of the training sessions and the participatory exercises are contained in Supplementary Files 2 and 3; the short presentations can be accessed on Slideshare (see Supplementary File 4 for links).

#### ***Early project training (Months 1 to 12).***

Training began at Month 8, after the RESTORE researchers had been appointed in each country. The rationale for using theory to shape and inform research was presented and NPT, the theory chosen to underpin RESTORE, was introduced using previous studies as examples as well as the on-line NPT toolkit (<http://www.normalizationprocess.org/>). In an interactive group exercise, the researchers were asked to consider what issues might arise during the implementation of professional

1  
2  
3 interpreters in primary care. To assist this exercise, we used the 16 NPT-informed questions outlined  
4  
5 in Table 1.

6  
7  
8 This approach, however, proved too prescriptive and over-whelming for team members trying to  
9  
10 assimilate knowledge about applying theory to research (see Results). This led to several important  
11  
12 modifications in the development of the training. In consultation with our PLA experts (MO'RdeB  
13  
14 and TdeB), we incorporated more PLA-informed exercises and approaches into the training.<sup>42</sup>  
15  
16 Consequently, later sessions had one or at most two short didactic presentations, with the  
17  
18 remaining time spent on participatory exercises. The training content was aligned more closely to  
19  
20 the temporal arrangement of the project itself and linked to the over-arching constructs of NPT.  
21  
22 Thus, we focused principally on sense-making (coherence) and engagement work (cognitive  
23  
24 participation) first, before turning to the actual work undertaken (collective action) and, finally,  
25  
26 monitoring and appraisal work (reflexive monitoring) (Figure 2).  
27  
28  
29  
30  
31

### 32 ***Mid-project training (Months 13 to 24).***

33  
34  
35 At month 13, we focused on coherence (sense-making) and cognitive participation (engagement).  
36  
37 Learning from early training, we first used a non-RESTORE "light" example with a humorous exercise  
38  
39 which all the team could relate to – namely, could you contemplate staying in a circus tent at a  
40  
41 future RESTORE team meeting? (Figure 3)  
42

43  
44 INSERT FIGURE 3 HERE  
45

46  
47 A set of pre-developed NPT-informed sensitising questions focussed the team collectively and  
48  
49 individually on what they thought of such an idea and who would need to "buy-into" it to make it  
50  
51 work. This reduced the stress of assimilating too much information in a short space of time, and gave  
52  
53 the team space to build their knowledge and confidence about the theory and its constructs without  
54  
55 having the challenge of connecting the theory to fieldwork.  
56  
57  
58  
59  
60



1  
2  
3 Following this, a RESTORE specific role play was employed to think through the issues of using  
4 professional interpreters in a primary care setting; this example drew on team members' own  
5 experiences of working with interpreters. Although this was designed to focus the discussion on  
6 issues relating to coherence and cognitive participation, issues relating to collective action and  
7 reflexive monitoring also arose (see Results).  
8  
9

10  
11  
12  
13  
14 By month 20, when the next face-to-face training took place, the teams were preparing to  
15 commence fieldwork with their stakeholders (Stage 2 of RESTORE). Teams were given another  
16 opportunity to participate in an interactive role play. For this, a G/TI selected by one of the RESTORE  
17 teams in collaboration with their stakeholders was used, with team members asked to role play the  
18 kind of discussions they might encounter in their fieldwork. The issues and questions that arose  
19 during this were recorded and mapped to the four NPT constructs by the other team members,  
20 using large wall charts and stickie notelets. The resultant mapping was then reviewed by the NPT  
21 trainers and discussed by the group.  
22  
23  
24  
25  
26  
27  
28  
29  
30  
31  
32  
33  
34

#### 35 ***Later training sessions (Months 25 to 40).***

36  
37 By month 25, teams were conducting fieldwork and moving into Stage 3, where the chosen G/TI  
38 would be fully adapted, implemented and the result of that implementation monitored. Teams were  
39 now generating qualitative data about that process, which required the development of a coding  
40 framework broadly applicable across all the participating sites. Thus, training focused both on the  
41 constructs of collective action and reflexive monitoring and on the process of analysis.  
42  
43  
44  
45  
46  
47

48 To address training in analysis, an anonymised extract of data generated from RESTORE fieldwork in  
49 Ireland was selected. This was pre-circulated to the teams for coding to the four constructs and, if  
50 possible, to the sub-constructs. In addition to team coding, the extract was sent to the trainers and  
51 to three recognised external experts in NPT. Coded data were collated and presented at the  
52 Consortium training at Month 25.  
53  
54  
55  
56  
57  
58  
59  
60

1  
2  
3 Training sessions at Months 38 and 43 focussed on analysis. Teams were asked to review extracts of  
4  
5 data or to bring examples of coding dilemmas with them. Coding dilemmas included examples of  
6  
7 data that researchers were concerned were being miscoded; data did not appear to fit into the NPT  
8  
9 framework; and data that appeared to be particular to only one site. Evaluation at the end of these  
10  
11 later sessions allowed the NPT trainers to clarify the team's understanding of the coding process and  
12  
13 to address any on-going concerns through teleconferences or email.  
14  
15

### 16 17 18 19 **Non face-to-face support**

20  
21 Several mechanisms were put into place to support teams in-between face-to-face sessions,  
22  
23 including buddy groups (linking teams experienced in theory use with less experienced teams);  
24  
25 telephone and video conferences; email feedback on issues and problems. Later in the project,  
26  
27 telephone and video conferences were also used to support data analysis, promoting consistency in  
28  
29 the application of theory to analysis across the participating countries.  
30  
31

32  
33 Outside the formal training sessions, we uploaded NPT relevant information such as key papers and  
34  
35 links to the NPT Toolkit website ([www.normalizationprocess.org](http://www.normalizationprocess.org)) to a shared folder accessible by all  
36  
37 the research team to serve as a resource whenever required.  
38  
39

### 40 41 42 **Evaluation of the NPT training content**

43  
44  
45 Face-to-face training was evaluated qualitatively at the end of each training day. Methods included:  
46  
47 written lists of the 3 most positive and 3 most negative features of the training; speed evaluation  
48  
49 where each participant was given two minutes to verbally record which aspects of training had, or  
50  
51 had not, been effective for them; scoring elements of the training on a Likert scale (e.g. from 1 = very  
52  
53 poor to 5 = very good). These data were collected either as short written comments or recorded on a  
54  
55 digital recorder. Trainers reviewed the feedback thematically and used it to inform subsequent  
56  
57  
58  
59  
60

1  
2  
3 training sessions. Additional evaluation was conducted approximately three weeks after the first  
4  
5 session, when the team were emailed a short set of questions asking what had worked well; what  
6  
7 had not worked well; and what they wanted from future training sessions. The results of the  
8  
9 evaluations were summarised and fed back at RESTORE Consortium meetings providing researchers  
10  
11 with a further opportunity to comment on whether they believed all the key issues or suggestions  
12  
13 regarding training had been captured and addressed.  
14  
15

## 16 17 18 19 **Results**

20  
21 Team evaluation indicated that the early stages of training were too didactic and prescriptive. The  
22  
23 early use of the 16 NPT sensitising questions were not well liked by some researchers used to more  
24  
25 inductive methods of working. However others, particularly the clinicians, found this approach  
26  
27 helpful as they tried to develop their understanding of the theory's different constructs.  
28  
29

30  
31 *The 16 questions of the [NPT] toolkit gave us a better insight into what was meant by terms*  
32  
33 *like 'sense-making' 'participation' 'action' and 'monitoring'. (Buddy report from Dutch and*  
34  
35 *English teams).*  
36  
37

38  
39 In contrast, the use of practical examples grounded in the fieldwork they would have to conduct  
40  
41 during the course of the project and the use of "light" humorous exercises, where the team could  
42  
43 concentrate on the content of the theory without worrying about how it applied to future fieldwork  
44  
45 were evaluated well. The issue of whether construct application and data generation, in the field,  
46  
47 was linear was an on-going concern. Training, therefore, continuously emphasised the lack of  
48  
49 linearity in the process and encouraged the researchers to think through how this would affect data  
50  
51 collection in the field. This approach was described by some as follows:  
52

53  
54 *Coherence and cognitive participation refer, in the main, to processes before any*  
55  
56 *implementation work has occurred. However, we did note that the theory is fluid and not fixed*  
57  
58  
59  
60

1  
2  
3 *or linear, so this means that the experience of doing the implementation work (collective*  
4 *action) and reflecting on that work (reflexive monitoring) could influence coherence and*  
5 *cognitive participation over time..... An 'aha!' moment occurred when we distilled the thinking*  
6 *in the group around the difference between cognitive participation and collective action as*  
7 *'thinking about the doing' and 'doing the doing' (Buddy Report from Greek and Irish teams).*  
8  
9

10  
11  
12  
13  
14 Interactive exercises and role play designed to focus on coherence and cognitive participation also  
15 spontaneously picked up issues relating to collective action (who would actually do the work; how  
16 would it be funded) and reflexive monitoring (how would teams know if professional interpreters  
17 had an impact). This served as an important reminder that, even when NPT sensitising questions  
18 from researchers were designed to focus on sense-making and engagement, other issues would  
19 naturally emerge in the discussion, emphasising the lack of linearity in the application of theory to  
20 data generation.  
21  
22  
23  
24  
25  
26  
27  
28

29  
30 On-going telephone and email contact ensured that difficulties and tensions were quickly surfaced,  
31 particularly when theory was being applied to fieldwork. Training at month 20 began with an  
32 intensive de-briefing, where in-country teams were encouraged to freely discuss their concerns and  
33 challenges arising from using NPT. These focussed on two, related, concerns. There was a continued  
34 lack of confidence in their knowledge of NPT itself and of being able to correctly map issues and data  
35 generated in the field to the NPT constructs. However, the use of visual methods of collecting and  
36 displaying data generated during the interactive group exercises, as exemplified in PLA approaches,<sup>42</sup>  
37 meant that the trainers could quickly identify a high degree of fidelity in the assignment of data to  
38 NPT constructs, thus reassuring the team of their knowledge development (Figure 4).  
39  
40  
41  
42  
43  
44  
45  
46  
47  
48

49  
50 INSERT FIGURE 4 HERE  
51

52  
53 The second major issue continued to reflect the disciplinary and epistemological differences within  
54 the research team. Some researchers were used to policy-related research, where the application of  
55 a theoretical framework to data and the use of approaches such as Framework Analysis<sup>48</sup> were  
56  
57  
58  
59  
60

1  
2  
3 familiar. Others came from a sociological or anthropological background and were more comfortable  
4  
5 with an inductive data-driven approach to analysis. This led to understandable concerns that data  
6  
7 might be “flattened” and shoe-horned into the NPT framework. Thus, the face-to-face training  
8  
9 session at Month 31 focussed mainly on coding data extracts and on round-table discussion of the  
10  
11 approach being taken (Table 2). At this point, the work carried out in early training was invaluable as  
12  
13 there was now a high degree of trust and mutual understanding of NPT within the overall RESTORE  
14  
15 team.  
16  
17  
18  
19  
20  
21  
22  
23  
24  
25  
26  
27  
28  
29  
30  
31  
32  
33  
34  
35  
36  
37  
38  
39  
40  
41  
42  
43  
44  
45  
46  
47  
48  
49  
50  
51  
52  
53  
54  
55  
56  
57  
58  
59  
60

Table 2. Coding example from a transcript

| Speaker       | Text                                                                                                                                                                                                                                                                                                                                                                                                                                                            | NPT Coding                                                                                                                                                                                                                                                                                                                                                                        |
|---------------|-----------------------------------------------------------------------------------------------------------------------------------------------------------------------------------------------------------------------------------------------------------------------------------------------------------------------------------------------------------------------------------------------------------------------------------------------------------------|-----------------------------------------------------------------------------------------------------------------------------------------------------------------------------------------------------------------------------------------------------------------------------------------------------------------------------------------------------------------------------------|
| Facilitator   | So when we began this, this morning [name] as the policy person you made a very interesting comment and you started the whole ball rolling with this didn't you?                                                                                                                                                                                                                                                                                                |                                                                                                                                                                                                                                                                                                                                                                                   |
| Policy maker* | Yeah, I suppose just reflecting on where we are at, at the moment within the health organisation is that we have a ban on travel and there's an embargo on education and training initiatives.<br><br>So something like this that provides a DVD, training and guidance is a major plus. It's something that's really going to tick the boxes for us whilst be very meaningful for front line staff as well<br><br>very meaningful for front line staff as well | Text coded to <b>coherence</b> – trying to make sense of the training initiative; what makes it a new way or working.<br><br>Text coded to <b>collective action</b> – indicates what is involved and the resources provided (DVD, training and guidance).<br><br>Text double coded to <b>cognitive participation</b> – consideration of other groups that need to be engaged with |
| Facilitator   | Okay so it's got two real advantages there, it's going to get over the problem you have about not being able to travel, not being able to go out and do the capacity building and training because it hands it to you right on the plate, as you see it. And also it's going to be very meaningful for front line staff, and if I remember [name] you found that interesting. You had a comment about that...                                                   |                                                                                                                                                                                                                                                                                                                                                                                   |
| GP*           | Yeah I think this was mine here, so as a GP I really liked the fact that there was a resource available to me as a front line member of staff, a resource available to me which answers a lot of the questions that I have about using interpreters in my practice and how that might work. So I found that very helpful.                                                                                                                                       | Coded to coherence – reflects that this is a new way of working ( <b>differentiation</b> ); recognises the benefits ( <b>internalisation</b> ).                                                                                                                                                                                                                                   |

\* Transcript recorded as part of a training DVD where several researchers role-played a discussion amongst health care professionals, policy makers, migrants' representatives and interpreters about the implementation of a training initiative to support the use of trained interpreters in primary care consultations in Ireland. Researchers were assigned these roles; facilitator was one of RESTORE's PLA experts.

## Discussion

### *Principal findings and their relation to other work*

We have described our approach to applying a mid-level sociological theory – Normalisation Process Theory – to a multi-site research study, RESTORE. In our endeavour to use NPT to shape our overall implementation journey, including data collection as well as analysis, we had to develop iterative and flexible training to support our multi-disciplinary, cross-national project team. While this presented challenges, we believe it also strengthened and added value to our work, ensuring it was designed, implemented and analysed in a robust and consistent manner across all five countries in which empirical data collection was conducted. From our experience of developing training for using NPT, we have developed a series of generic recommendations that can be applied to other studies seeking to use theoretical frameworks in health services research (Table 3).

**Table 3 Recommendations for the future development of training to support the use of theory in health services research**

|                                                                                                                                                           |
|-----------------------------------------------------------------------------------------------------------------------------------------------------------|
| 1. The application of theory is not linear and training must acknowledge this                                                                             |
| 2. Experiential learning and the use of interactive, participatory and visual approaches are an important learning device.                                |
| 3. Training can be most effective when it focuses on the high level constructs of a theory.                                                               |
| 4. Different disciplinary backgrounds must be acknowledged and welcomed.                                                                                  |
| 5. Space is required in the training programme to acknowledge and address concerns.                                                                       |
| 6. Training in the qualitative application of theory can support the development and robustness of qualitative coding, especially for multi-site studies. |

A key recommendation is to acknowledge, from the beginning of training, that theory is not linear or sequential. This is often a challenge when applying theoretical frameworks to fieldwork; for example, Michie and colleagues have developed their Behaviour Change model as a wheel, in order to address any pre-conceived conceptions of “linearity”.<sup>49</sup> The model of candidacy has also been

1  
2  
3 criticised for an apparent linearity that is not found when applied in the field.<sup>50 51</sup> The nature and  
4  
5 speed of fieldwork means it is important for researchers to be familiar with all constructs of a  
6  
7 selected theory, in order to fully appreciate the theoretical relevance of the data as it is generated.  
8

9  
10 Thus, training needs to both acknowledge and affirm the complexities of temporal order in  
11  
12 prospective fieldwork and ensure that researchers are familiar with all the components of a  
13  
14 theoretical framework early enough in the research study to ensure confidence when moving into  
15  
16 fieldwork.

17  
18 Team learning and understanding develops more rapidly and deeply by using participatory and  
19  
20 experiential approaches to learning.<sup>42</sup> In our work, interactive exercises with visual methods of  
21  
22 collecting data, role play and non-specific “light” examples were all effective approaches to  
23  
24 supporting learning and understanding. We strongly recommend this approach in the development  
25  
26 of training for any complex theory that requires new users to develop an understanding of a range of  
27  
28 components. The second advantage of using multiple interactive exercises is as a means to check on  
29  
30 research team’s “theoretical fidelity” when analysing the data generated in the field.  
31  
32

33  
34 Theoretical frameworks are often complex, with constructs which can themselves be broken down  
35  
36 to ever smaller sub-constructs. This level of complexity can be daunting for researchers new to the  
37  
38 theory being used and can lead to difficulties when coding data. Our experience suggests that a  
39  
40 focus on the high level constructs of a theory works best in the early stages of training. Once teams  
41  
42 have grasped and understood those, they can intuitively develop a deeper understanding of the  
43  
44 underlying sub-components.  
45

46  
47 Throughout our training programme, we allowed ample time for concerns to be raised and discussed  
48  
49 and for the team to develop solutions. An advantage of the time spent of training was apparent,  
50  
51 however, later in the project as we moved onto coding the qualitative data generated across  
52  
53 multiple sites. By then, the time spent in early training ensured that the team had a much clearer  
54  
55



1  
2  
3 and consistent view of the constructs and their meaning, leading to a consistency and robustness in  
4  
5 coding and analysis.  
6  
7  
8  
9

### 10 ***Strengths and Limitations***

11  
12 This training programme in the use of a mid-level theory was developed for a multi-disciplinary team  
13 working across 6 European countries; thus, it also had to pay careful attention to both language and  
14 cultural differences across the RESTORE research team. The evaluation and careful monitoring of  
15 both the development and delivery of the training is a clear strength of this work. That the training  
16 programme was acceptable to such a diverse group is another strength. Weaknesses include the  
17 small group of researchers involved, although the team did include a range of disciplinary and  
18 research backgrounds. The training was focused on the use of only one theoretical framework – NPT  
19 – but we believe that the lessons learned from this and the recommendations arising from the work  
20 are applicable to other theoretical frameworks.  
21  
22  
23  
24  
25  
26  
27  
28  
29  
30  
31  
32  
33  
34  
35  
36

### 37 **Conclusion**

38 Overall, we have found the prospective application of NPT to our work to be invaluable but, at times,  
39 challenging. We believe that these issues were not unique to the use of NPT, but could arise with the  
40 use of other theoretical frameworks, especially in large multi-site projects. The development of a  
41 complementary package of training to support the use of our chosen theory ensured that our work  
42 has been consistently and robustly informed by theory at all stages of the project, from design  
43 through data collection to analysis. This approach can, and should, be adopted by future research  
44 teams carrying out theoretically-informed implementation studies.  
45  
46  
47  
48  
49  
50  
51  
52  
53  
54  
55  
56  
57  
58  
59  
60

### Competing interests

The authors declare that there are no competing interests.

### Authors contributions

All authors (COD, FM, CD, MO'RdeB, TdeB, NB, CL, AS, MP, MvdM, EvWB, KG, LC, CP, ET, FvdDM, MV, WS, AMcF) made substantial contributions to the design and development of RESTORE and its training programme, to the collection of data or to the analysis and interpretation of the data. Training materials were developed by COD, FM, CD and AMcF, with input from MO'RdeB and TdeB. COD wrote the first draft of the paper and led substantive re-drafting, supported by FM, CD and AMcF; all authors listed above were involved in revising and commenting on later drafts of the manuscript. All authors have given their final approval to this version.

### Acknowledgements

Some of this work was presented at a workshop at the North American Primary Care Research Group Meeting in November 2014 and we thank the participants for their helpful comments; we also thank Professor Carl May, University of Southampton for his support and helpful discussions.

### Consent to use data

Ethical approval to use data generated during training was obtained from the National University of Ireland, Galway. All members of the RESTORE team agreed to their evaluation comments being used in this paper.

**Funding**

RESTORE was funded by the European Union's FP7 Health Programme, contract number 257258.

The funder has not contributed to the views expressed in this paper.

**Data Sharing**

No additional data available. Training materials are available as described in the Supplementary Files.

For peer review only

## References

1. Woolf SH. The meaning of translational research and why it matters. *JAMA* 2008;**299**(2):211-13.
2. Pronovost PJ, Goeschel CA. Time to take health delivery research seriously. *JAMA* 2011;**306**(3):310-11.
3. Eccles MP, Armstrong D, Baker R, et al. An implementation research agenda. *Implementation Science* 2009;**4**(1):18.
4. Greenhalgh T, Robert G, Macfarlane F, et al. Diffusion of innovations in service organizations: Systematic review and recommendations. *Milbank Quarterly* 2004;**82**(4):581-629.
5. The Improved Clinical Effectiveness through Behavioural Research Group (ICEBeRG). Designing theoretically-informed implementation interventions. *Implementation Science* 2006;**1**(1):4.
6. Davidoff F, Dixon-Woods M, Leviton L, et al. Demystifying theory and its use in improvement. *BMJ Quality & Safety* 2015.
7. Sales A, Smith J, Curran G, et al. Models, strategies, and tools. Theory in implementing evidence-based findings into health care practice. *Journal of General Internal Medicine* 2006;**21**(2):S43-S49.
8. Forster D, Newton M, McLachlan H, et al. Exploring implementation and sustainability of models of care: can theory help? *BMC Public Health* 2011;**11**(Suppl 5):S8.
9. Craig P, Dieppe P, Macintyre S, et al. Developing and evaluating complex interventions: The new Medical Research Council guidance. *International Journal of Nursing Studies* 2013;**50**(5):587-92.
10. Davies P, Walker A, Grimshaw J. A systematic review of the use of theory in the design of guideline dissemination and implementation strategies and interpretation of the results of rigorous evaluations. *Implementation Science* 2010;**5**(1):14.

- 1  
2  
3 11. Colquhoun HL, Brehaut JC, Sales A, et al. A systematic review of the use of theory in randomized  
4  
5 controlled trials of audit and feedback. *Implementation Science* 2013;**8**(1):66.  
6
- 7  
8 12. McDonald KM, Graham ID, Grimshaw J. Toward a theoretic basis for quality improvement  
9  
10 interventions. In: Shojania KG, McDonald KM, Wachter RM, et al., eds. *Closing the quality*  
11  
12 *gap: A critical analysis of quality improvement strategies* Rockville, MD: Agency for  
13  
14 *Healthcare Research and Quality*, 2004:27-40.  
15
- 16  
17 13. Nilsen P. Making sense of implementation theories, models and frameworks. *Implementation*  
18  
19 *Science* 2015;**10**(1):53.  
20
- 21  
22 14. Weiss CH. Nothing as practical as a good theory: Exploring theory-based evaluation for  
23  
24 comprehensive community-based initiatives for children and families. In: Connell JP, Kubisch  
25  
26 AC, Schorr LB, et al., eds. *New approaches to evaluating community initiatives, Vol 1*  
27  
28 *Concepts, methods and contexts*. Washington DC: Aspen Institute, 1995.  
29
- 30  
31 15. Tabak RG, Khoong EC, Chambers DA, et al. Bridging research and practice: Models for  
32  
33 dissemination and implementation research. *American Journal of Preventive Medicine*  
34  
35 2012;**43**(3):337-50.  
36
- 37  
38 16. Grol RPTM, Bosch MC, Hulscher MEJL, et al. Planning and studying improvement in patient care:  
39  
40 The use of theoretical perspectives. *The Milbank Quarterly* 2007;**85**(1):93-138.  
41
- 42  
43 17. Wyke S, Adamson J, Dixon D, et al. Consultation and illness behaviour in response to symptoms:  
44  
45 A comparison of models from different disciplinary frameworks and suggestions for future  
46  
47 research directions. *Social Science & Medicine* 2013;**86**(0):79-87.  
48
- 49  
50 18. Ullrich PM, Sahay A, Stetler CB. Use of implementation theory: A focus on PARIHS. *Worldviews*  
51  
52 *on Evidence-Based Nursing* 2014;**11**(1):26-34.  
53
- 54  
55 19. Glasgow RE, Vogt TM, Boles SM. Evaluating the public health impact of health promotion  
56  
57 interventions: the RE-AIM framework. *Am J Public Health* 1999;**89**(9):1322-27.  
58  
59  
60

- 1  
2  
3 20. Gaglio B, Shoup JA, Glasgow RE. The RE-AIM framework: A systematic review of use over time.  
4  
5 American Journal of Public Health 2013;**103**(6):e38-e46.  
6  
7  
8 21. Kitson AL, Rycroft-Malone J, Harvey G, et al. Evaluating the successful implementation of  
9  
10 evidence into practice using the PARIHS framework: theoretical and practical challenges.  
11  
12 Implementation Science 2008;**3**(1):1.  
13  
14  
15 22. Helfrich CD, Damschroder LJ, Hagedorn HJ, et al. A critical synthesis of literature on the  
16  
17 promoting action on research implementation in health services (PARIHS) framework.  
18  
19 Implementation Science 2010;**5**(1):82.  
20  
21  
22 23. Field B, Booth A, Iltott I, et al. Using the Knowledge to Action Framework in practice: a citation  
23  
24 analysis and systematic review. Implementation Science 2014;**9**(1):172.  
25  
26  
27 24. McEvoy R, Ballini L, Maltoni S, et al. A qualitative systematic review of studies using the  
28  
29 normalization process theory to research implementation processes. Implementation  
30  
31 Science 2014;**9**(1):2.  
32  
33  
34 25. Crosby R, Noar SM. Theory development in health promotion: are we there yet? J Behav Med  
35  
36 2010;**33**(4):259-63.  
37  
38  
39 26. Benzer J, Beehler S, Cramer I, et al. Between and within-site variation in qualitative  
40  
41 implementation research. Implementation Science 2013;**8**(1):4.  
42  
43  
44 27. MacFarlane A, O'Donnell C, Mair F, et al. REsearch into implementation STRategies to support  
45  
46 patients of different ORigins and language background in a variety of European primary care  
47  
48 settings (RESTORE): study protocol. Implementation Science 2012;**7**:111.  
49  
50  
51 28. MacFarlane A, O'Reilly-de Brún M, de Brún T, et al. Healthcare for migrants, participatory health  
52  
53 research and implementation science—better health policy and practice through inclusion.  
54  
55 The RESTORE project. European Journal of General Practice 2014:1-5.  
56  
57  
58  
59  
60

- 1  
2  
3 29. O'Donnell CA, Burns N, Mair FS, et al. Reducing the health care burden for marginalised migrants:  
4  
5 The potential role for primary care in Europe. *Health Policy* 2016.  
6  
7  
8 30. O'Reilly-de Brún M, MacFarlane A, de Brún T, et al. Involving migrants in the development of  
9  
10 guidelines for communication in cross-cultural general practice consultations: a participatory  
11  
12 learning and action research project. *BMJ Open* 2015;**5**(9).  
13  
14  
15 31. de Brún T, O'Reilly de-Brún M, van Weel-Baumgarten E, et al. Guidelines and training initiatives  
16  
17 that support communication in cross-cultural primary-care settings: appraising their  
18  
19 implementability using Normalization Process Theory. *Family Practice* 2015;**32**(4):420-25.  
20  
21  
22 32. Lionis C, Papadakaki M, Saridaki A, et al. Engaging migrants and other stakeholders to improve  
23  
24 communication in cross-cultural consultation in primary care: a theoretically informed  
25  
26 participatory study. *BMJ Open* 2016;**6**(7).  
27  
28  
29 33. May C, Finch T, Mair F, et al. Understanding the implementation of complex interventions in  
30  
31 health care: the normalization process model. *BMC Health Services Research* 2007;**7**:148.  
32  
33  
34 34. May C, Mair F, Dowrick C, et al. Process evaluation for complex interventions in primary care:  
35  
36 understanding trials using the normalization process model. *BMC Family Practice*  
37  
38 2007;**8**(1):42.  
39  
40  
41 35. May CR. Assessing and evaluating complex interventions for chronic disease management: The  
42  
43 nomalization process model, 2006.  
44  
45  
46 36. Murray E, Treweek S, Pope C, et al. Normalisation process theory: a framework for developing,  
47  
48 evaluating and implementing complex interventions. *BMC Medicine* 2010;**8**(1):63.  
49  
50  
51 37. Gunn JM, Palmer VJ, Dowrick CF, et al. Embedding effective depression care: using theory for  
52  
53 primary care organisational and systems change. . *Implementation Science* 2010;**5**:62.  
54  
55  
56 38. McEvoy R, MacFarlane A. Community participation in primary care in Ireland: the need for  
57  
58 implementation research. *Primary Health Care Research & Development* 2013;**14**(2):126-39.  
59  
60

- 1  
2  
3 39. Devlin AM, McGee-Lennon M, O'Donnell CA, et al. Delivering digital health and well-being at  
4  
5 scale: Lessons learned during the implementation of the dallas program in the United  
6  
7 Kingdom. *Journal of the American Medical Informatics Association* 2016;**23**:48-59.  
8  
9  
10 40. May C, Finch T. Implementing, embedding, and integrating practices: An outline of Normalization  
11  
12 Process Theory. *Sociology* 2009;**43**(3):535-54.  
13  
14  
15 41. May CR, Mair F, Finch T, et al. Development of a theory of implementation and integration:  
16  
17 Normalization Process Theory. *Implementation Science* 2009;**4**(1):29.  
18  
19  
20 42. de Brún T, O'Reilly-de Brún M, O'Donnell CA, et al. Learning from doing: the case for combining  
21  
22 normalisation process theory and participatory learning and action research methodology  
23  
24 for primary healthcare implementation research. *BMC Health Services Research*  
25  
26 2016;**16**(1):1-12.  
27  
28  
29 43. Bamford C, Heaven B, May C, et al. Implementing nutrition guidelines for older people in  
30  
31 residential care homes: a qualitative study using Normalization Process Theory.  
32  
33 *Implementation Science* 2012;**7**(1):106.  
34  
35  
36 44. May CR, Sibley A, Hunt K. The nursing work of hospital-based clinical practice guideline  
37  
38 implementation: An explanatory systematic review using Normalisation Process Theory.  
39  
40 *International Journal of Nursing Studies* 2014;**51**(2):289-99.  
41  
42  
43 45. Gallacher K, May CR, Montori VM, et al. Understanding patients' experiences of treatment  
44  
45 burden in chronic heart failure using Normalization Process Theory. *Annals of Family*  
46  
47 *Medicine* 2011;**9**(3):235-43.  
48  
49  
50 46. Gallacher K, Morrison D, Jani B, et al. Uncovering treatment burden as a key concept for stroke  
51  
52 care: A systematic review of qualitative research. *PLoS Med* 2013;**10**(6):e1001473.  
53  
54  
55  
56  
57  
58  
59  
60



- 1  
2  
3 47. Jani B, Blane D, Browne S, et al. Identifying treatment burden as an important concept for end of  
4  
5 life care in those with advanced heart failure. *Current Opinion in Supportive Palliative Care*  
6  
7 2013;**7**(1):3-7.  
8  
9  
10 48. Ritchie J, Spencer L. Qualitative data analysis for applied policy research. In: Bryman A, Burgess  
11  
12 RG, eds. *Analyzing qualitative data*. London: Routledge, 1994:173-94.  
13  
14  
15 49. Michie S, van Stralen MM, West R. The behaviour change wheel: A new method for  
16  
17 characterising and designing behaviour change interventions. *Implementation Science*  
18  
19 2011;**6**(1):42.  
20  
21  
22 50. Mackenzie M, Conway E, Hastings A, et al. Is "candidacy" a useful concept for understanding  
23  
24 journeys through public services? A critical interpretive literature synthesis. *Social Policy &*  
25  
26 *Administration* 2013;**47**(7):806-25.  
27  
28  
29 51. Mackenzie M, Conway E, Hastings A, et al. Intersections and multiple 'candidacies': Exploring  
30  
31 connections between two theoretical perspectives on domestic abuse and their implications  
32  
33 for practicing policy. *Social Policy and Society* 2015;**14**(01):43-62.  
34  
35  
36  
37  
38  
39  
40  
41  
42  
43  
44  
45  
46  
47  
48  
49  
50  
51  
52  
53  
54  
55  
56  
57  
58  
59  
60

Figure 1. The three stages of RESTORE

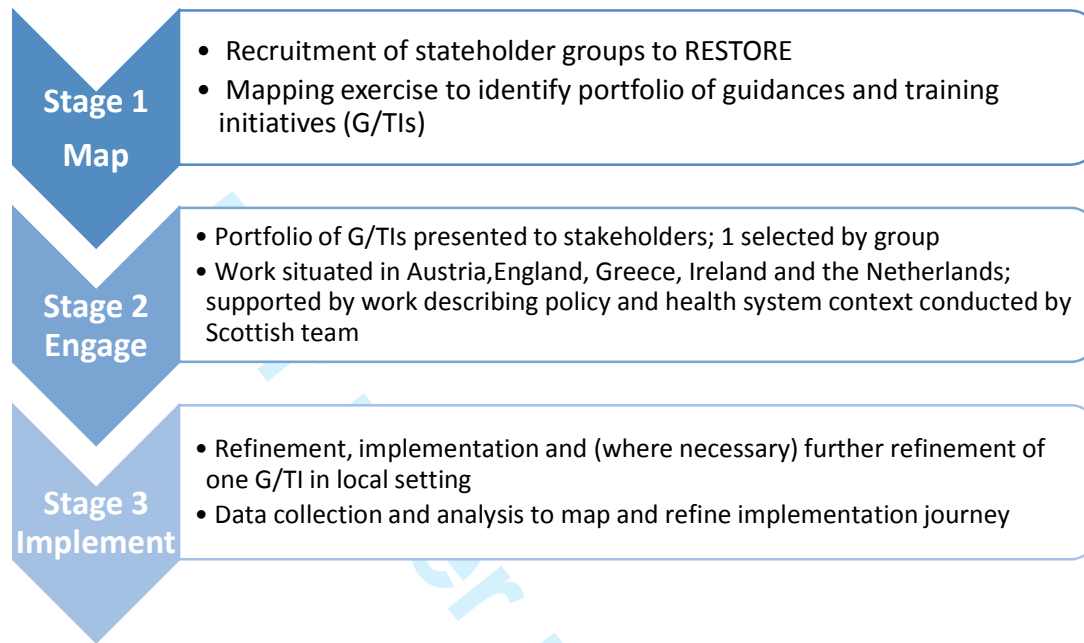

Figure 2. Stages of NPT training and alignment with RESTORE fieldwork

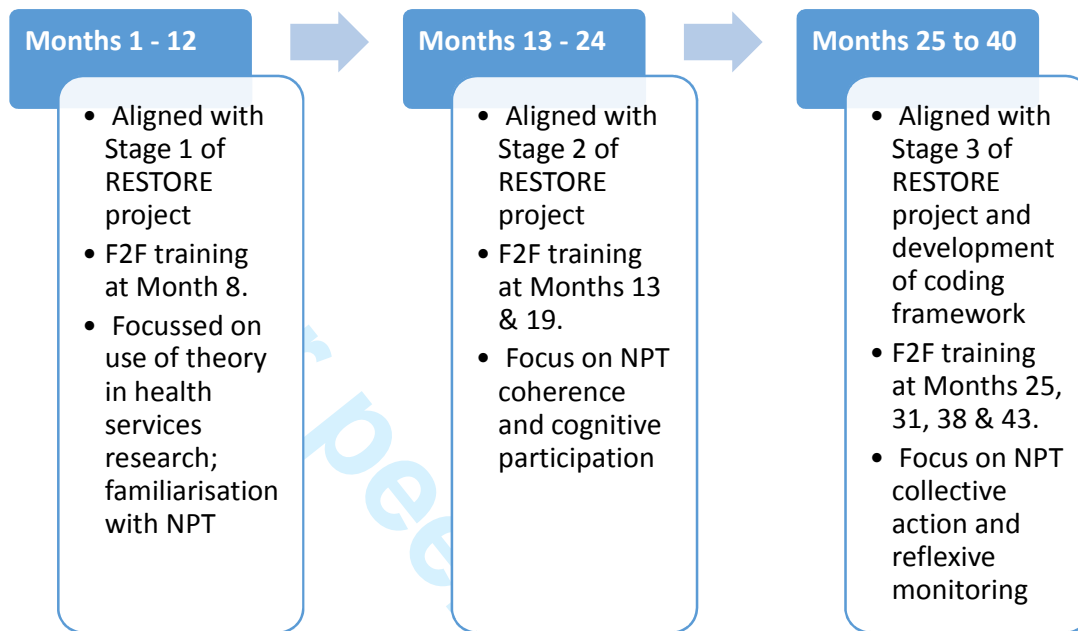

1  
2  
3 **Figure 3. NPT “light” training material**  
4  
5

6  
7 ***Question: Do we think a circus tent can become a normalised venue for accommodation***  
8 ***for our next RESTORE team meeting?***  
9

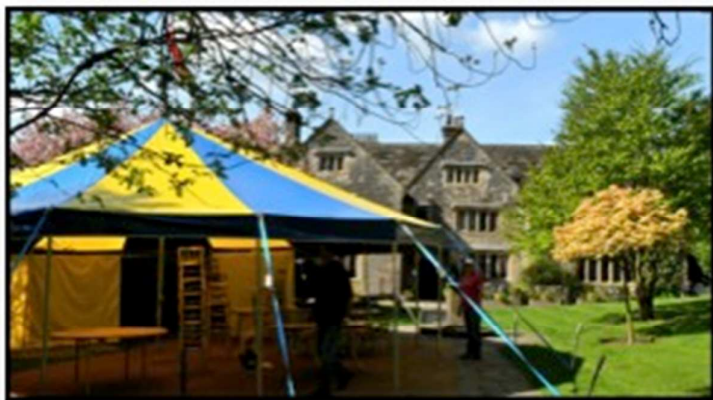

25 In addressing this question, consider the following NPT sensitising questions:  
26

27 Does this make sense to the team as a whole and to individuals within the team?

28 (Coherence)

29 What work needs to be done to get everyone in the team to engage with the idea?

30 (Cognitive participation)

31 Who needs to do what to put this into action? What resources do we need? (Collective  
32 action)

33 How will we know if it worked in practice? (Reflexive monitoring)  
34  
35  
36  
37  
38  
39  
40  
41  
42  
43  
44  
45  
46  
47  
48  
49  
50  
51  
52  
53  
54  
55  
56  
57  
58  
59  
60

1  
2  
3  
4  
5  
6  
7  
8  
9  
10  
11  
12  
13  
14  
15  
16  
17  
18  
19  
20  
21  
22  
23  
24  
25  
26  
27  
28  
29  
30  
31  
32  
33  
34  
35  
36  
37  
38  
39  
40  
41  
42  
43  
44  
45  
46  
47  
48  
49  
50  
51  
52  
53  
54  
55  
56  
57  
58  
59  
60

For peer review only

1  
2  
3  
4  
5  
6  
7  
8  
9  
10  
11  
12  
13  
14  
15  
16  
17  
18  
19  
20  
21  
22  
23  
24  
25  
26  
27  
28  
29  
30  
31  
32  
33  
34  
35  
36  
37  
38  
39  
40  
41  
42  
43  
44  
45  
46  
47  
48  
49  
50  
51  
52  
53  
54  
55  
56  
57  
58  
59  
60

Figure 4. Example of a visual data mapping exercise

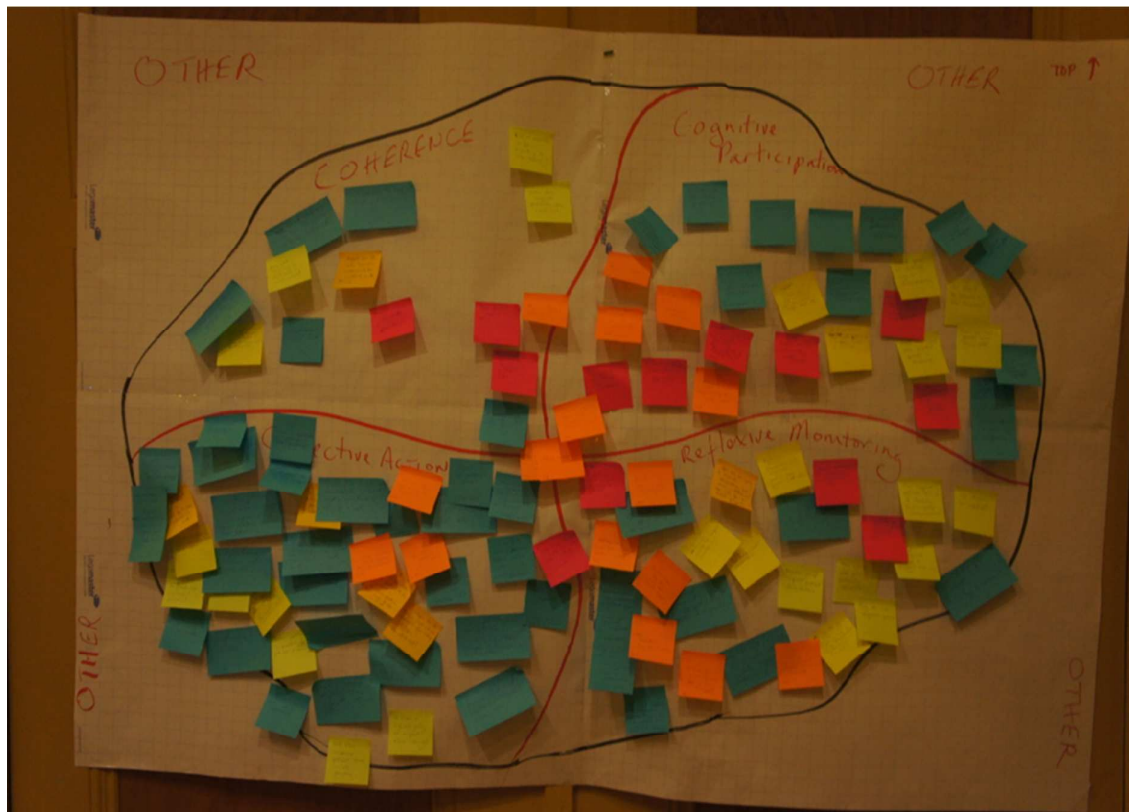

Each “sticky” notelet corresponds to an item of verbal data identified from the interactive role play discussion

View only

## Supplementary File 1. RESTORE team backgrounds and NPT experience

| Country           | Professional background                                                | Experience of NPT                                                   | Country            | Professional background        | Experience of NPT                                                                                  |
|-------------------|------------------------------------------------------------------------|---------------------------------------------------------------------|--------------------|--------------------------------|----------------------------------------------------------------------------------------------------|
| <b>Austria</b>    |                                                                        |                                                                     | <b>Ireland</b>     |                                |                                                                                                    |
| RESTORE Applicant | Academic general practitioner                                          | New to NPT                                                          | RESTORE Applicant  | Social scientist               | Experienced in use of NPT; part of original group who developed NPT; using NPT in several projects |
| Researcher        | Social scientist                                                       | New to NPT                                                          | Researcher         | Social/cultural anthropologist | Familiar with NPM; New to NPT                                                                      |
|                   |                                                                        |                                                                     | Researcher         | Social/cultural anthropologist | New to NPT                                                                                         |
| <b>England</b>    |                                                                        |                                                                     | <b>Netherlands</b> |                                |                                                                                                    |
| RESTORE Applicant | Academic general practitioner                                          | Experienced in use of NPT; part of original group who developed NPT | RESTORE Applicant  | Academic general practitioner  | New to NPT                                                                                         |
| Researcher        | Social anthropologist                                                  | New to NPT                                                          | RESTORE Applicant  | Academic general practitioner  | New to NPT                                                                                         |
| Researcher        | Social scientist                                                       | New to NPT                                                          | Researcher         | Academic general practitioner  | New to NPT                                                                                         |
|                   |                                                                        |                                                                     | Researcher         | Social/cultural anthropologist | New to NPT                                                                                         |
| <b>Greece</b>     |                                                                        |                                                                     | <b>Scotland</b>    |                                |                                                                                                    |
| RESTORE Applicant | Academic general practitioner; Primary health care services researcher | New to NPT                                                          | RESTORE Applicant  | Health services research       | Experienced in use of NPT; part of NIHR NPT user group; using NPT in several projects              |
| Researcher        | Public health researcher                                               | New to NPT                                                          | RESTORE Applicant  | Academic general practitioner  | Experienced in use of NPT; part of original group who developed NPT; using NPT in                  |

1  
2  
3  
4  
5  
6  
7  
8  
9  
10  
11  
12  
13  
14  
15  
16  
17  
18  
19  
20  
21  
22  
23  
24  
25  
26  
27  
28  
29  
30  
31  
32  
33  
34  
35  
36  
37  
38  
39  
40  
41  
42  
43  
44  
45  
46  
47  
48  
49

|            |                         |            |  |            |             |                                |
|------------|-------------------------|------------|--|------------|-------------|--------------------------------|
| Researcher | Lecturer in social work | New to NPT |  | Researcher | Sociologist | several projects<br>New to NPT |
|------------|-------------------------|------------|--|------------|-------------|--------------------------------|

---

For peer review only



## Supplementary File 2. NPT training programme

| Training                     | Session & Duration                 | Content                                                                                                                                                                                                                                                                                                                                            |
|------------------------------|------------------------------------|----------------------------------------------------------------------------------------------------------------------------------------------------------------------------------------------------------------------------------------------------------------------------------------------------------------------------------------------------|
| Month 8<br>November<br>2011  | Training Session 1.<br>(2.5 hours) | <b>Introduction to NPT.</b><br>Development of NPT from ehealth research.<br>Overview of NPT and its four main constructs.                                                                                                                                                                                                                          |
|                              | Training Session 2.<br>(4.5 hours) | <b>Using NPT in RESTORE.</b><br>Example of using NPT in a qualitative study on use of interpreters in primary care.<br>Using NPT in RESTORE – focus on constructs of coherence and cognitive participation<br><br>Participatory Exercise 1: Team asked to think about the issues arising from implementation of paid interpreters in primary care. |
| Month 13<br>April 2012       | Training Session 3.<br>(2.0 hours) | <b>Using NPT in RESTORE.</b><br>Focus of NPT constructs coherence and cognitive participation.<br><br>Participatory Exercise 2: NPT “light” non-RESTORE exercise                                                                                                                                                                                   |
|                              | Training Session 4.<br>(2.0 hours) | Focus of NPT constructs coherence and cognitive participation.<br><br>Participatory Exercise 3: NPT RESTORE exercise                                                                                                                                                                                                                               |
| Month 20<br>November<br>2012 | Training Session 5<br>(2.0 hours)  | <b>Addressing anxieties.</b><br>Roundtable discussion of arising concerns.<br>Review of why NPT being used and its role in the project.                                                                                                                                                                                                            |
|                              | Training Session 6<br>(2.0 hours)  | <b>Using NPT in RESTORE.</b><br>Participatory Exercise 4: NPT RESTORE exercise                                                                                                                                                                                                                                                                     |
| Month 25                     | Training session 7                 | <b>Coding using NPT.</b>                                                                                                                                                                                                                                                                                                                           |

---

|                                                                                                                                                                                                    |                          |                                   |                                                                                                                                                                                             |
|----------------------------------------------------------------------------------------------------------------------------------------------------------------------------------------------------|--------------------------|-----------------------------------|---------------------------------------------------------------------------------------------------------------------------------------------------------------------------------------------|
| 1<br>2<br>3<br>4<br>5<br>6<br>7<br>8<br>9                                                                                                                                                          | April 2013               | (2.5 hours)                       | Preparatory work of coding data extract; face-to-face discussion of coding decisions at Consortium training.<br><br>Participatory Exercise 5: Discussion of coded extract of RESTORE data.  |
| 10<br>11<br>12<br>13<br>14<br>15<br>16<br>17<br>18<br>19<br>20                                                                                                                                     | Month 31<br>October 2013 | Training session 8<br>(1.5 hours) | <b>Addressing anxieties.</b><br>Roundtable discussion of progress with respect to using NPT in fieldwork and in coding.                                                                     |
| 21<br>22<br>23<br>24<br>25<br>26<br>27                                                                                                                                                             | Month 38<br>May 2014     | Training session 9<br>(3 hours)   | <b>Coding using NPT.</b><br>Team reviewed coding exercise conducted in-between face-to-face meetings; discussed Irish data transcript coded by AMacF; and discussed team coding “dilemmas”. |
| 28<br>29<br>30<br>31<br>32<br>33<br>34<br>35<br>36<br>37<br>38<br>39<br>40<br>41<br>42<br>43<br>44<br>45<br>46<br>47<br>48<br>49<br>50<br>51<br>52<br>53<br>54<br>55<br>56<br>57<br>58<br>59<br>60 | Month 43<br>October 2014 | Training session 10<br>(3 hours)  | <b>Coding using NPT.</b><br>Focused on reviewing where each country team was in relation to NPT coding; connections between fieldwork and NPT; identifying and discussing coding dilemmas.  |
|                                                                                                                                                                                                    | Month 43<br>October 2014 | Training session 11               | Final discussion and clarification of coding framework.                                                                                                                                     |

---

1  
2  
3 **Supplementary File 3. Participatory exercises**  
4  
5  
6  
7

---

|                                                                                                                                                                                               |                                               |                                                                                                                                                                                                                                                                                                                                                                                                                                                                                                                                                                                                                                                                                                                                                                                                                                                            |
|-----------------------------------------------------------------------------------------------------------------------------------------------------------------------------------------------|-----------------------------------------------|------------------------------------------------------------------------------------------------------------------------------------------------------------------------------------------------------------------------------------------------------------------------------------------------------------------------------------------------------------------------------------------------------------------------------------------------------------------------------------------------------------------------------------------------------------------------------------------------------------------------------------------------------------------------------------------------------------------------------------------------------------------------------------------------------------------------------------------------------------|
| <p>8<br/>9<br/>10<br/>11<br/>12<br/>13<br/>14<br/>15<br/>16<br/>17<br/>18<br/>19<br/>20<br/>21<br/>22<br/>23<br/>24<br/>25<br/>26<br/>27<br/>28<br/>29<br/>30<br/>31<br/>32<br/>33<br/>34</p> | <p>Month 8,<br/>Participatory Exercise 1</p>  | <p>Consider the following scenario: Your health organisation is about to introduce paid interpreters into the primary care consultation. What NPT-informed questions might you ask to assess how well this is implemented into practice?</p> <p>Participants were directed to the NPT toolkit, with its 16 questions, to help them “think this through”</p>                                                                                                                                                                                                                                                                                                                                                                                                                                                                                                |
| <p>35<br/>36<br/>37<br/>38<br/>39<br/>40<br/>41<br/>42<br/>43<br/>44<br/>45<br/>46<br/>47<br/>48<br/>49<br/>50<br/>51<br/>52</p>                                                              | <p>Month 13,<br/>Participatory Exercise 2</p> | <p>NPT “light”: An exercise designed to get the research team thinking about coherence (understanding) and cognitive participation (participation). Using interactive small group work, the team focussed on an example entitle “Circus tent”. Teams were asked to consider if a circus tent could become normalised as team accommodation for future Consortium meetings.</p> <p>While the team debated this, the NPT trainers observed the questions, took notes and assigned these to NPT categories. E.g.</p> <p>Is this something new to me? (Coherence - Differentiation)</p> <p>Do you think this will be helpful to the team? (Coherence – Internalisation)</p> <p>Will everyone agree that this is reasonable? (Cognitive participation - Legitimation)</p> <p>How many of the team buy into this idea? (Cognitive participation = Enrolment)</p> |
| <p>53<br/>54<br/>55<br/>56<br/>57<br/>58<br/>59<br/>60</p>                                                                                                                                    | <p>Month 13,<br/>Participatory Exercise 3</p> | <p>NPT RESTORE exercise: Teams asked to consider the issues that might arise when implementing paid interpreters in primary care. Half of the team were assigned roles (GP, nurse, interpreter, migrant patient) and role-played a discussion about using interpreters; other half of team watched, noting key questions and issues that arose, then assigned these to NPT constructs.</p> <p>N.B. The exercise was designed to focus on the constructs of coherence and cognitive participation; however, teams also had to pay attention to collective action and reflexive monitoring.</p>                                                                                                                                                                                                                                                              |
| <p>53<br/>54<br/>55<br/>56<br/>57<br/>58<br/>59<br/>60</p>                                                                                                                                    | <p>Month 20,<br/>Participatory Exercise 4</p> | <p>NPT RESTORE exercise: Teams given the G/TL selected by the Irish team. Asked to role play as a practice team with roles assigned to address the question “What levels and barriers will you encounter as you try to implement this guidance in practice?”.</p> <p>Project members took turns at either role playing or noting NPT issue and assigning them to constructs.</p>                                                                                                                                                                                                                                                                                                                                                                                                                                                                           |
| <p>53<br/>54<br/>55<br/>56<br/>57<br/>58<br/>59<br/>60</p>                                                                                                                                    | <p>Month 25,<br/>Participatory Exercise 5</p> | <p>NPT RESTORE exercise: Teams pre-circulated a short extract from a training DVD developed by the PLA trainers in which the Irish team role-played a training session with stakeholders. Teams were asked to code the qualitative extract to the main NPT construct. Three external researchers expert in the use of NPT also asked to code the extract, as</p>                                                                                                                                                                                                                                                                                                                                                                                                                                                                                           |

---

1  
2  
3  
4  
5  
6  
7  
8  
9  
10  
11  
12  
13  
14  
15  
16  
17  
18  
19  
20  
21  
22  
23  
24  
25  
26  
27  
28  
29  
30  
31  
32  
33  
34  
35  
36  
37  
38  
39  
40  
41  
42  
43  
44  
45  
46  
47  
48  
49  
50  
51  
52  
53  
54  
55  
56  
57  
58  
59  
60

well as RESTORE NPT training team. Coding collated and presented, paragraph by paragraph, to team at face-to-face meeting.

---

For peer review only

1  
2  
3 **Supplementary File 4. Location of NPT presentations on Slideshare**  
4

5 NPT Unpicked for the RESTORE project ([http://www.slideshare.net/KateODonnell6/npt-unpicked-](http://www.slideshare.net/KateODonnell6/npt-unpicked-for-restore-project-57742520)  
6 [for-restore-project-57742520](http://www.slideshare.net/KateODonnell6/npt-unpicked-for-restore-project-57742520)).  
7

8  
9 NPT training session 2 for RESTORE ([http://www.slideshare.net/KateODonnell6/npt-training-session-](http://www.slideshare.net/KateODonnell6/npt-training-session-2-for-restore)  
10 [2-for-restore](http://www.slideshare.net/KateODonnell6/npt-training-session-2-for-restore))  
11

12 NPT in RESTORE (<http://www.slideshare.net/KateODonnell6/npt-in-restore>)  
13

14 NPT Coding exercise for RESTORE ([http://www.slideshare.net/KateODonnell6/npt-coding-exercise-](http://www.slideshare.net/KateODonnell6/npt-coding-exercise-for-restore-57743364)  
15 [for-restore-57743364](http://www.slideshare.net/KateODonnell6/npt-coding-exercise-for-restore-57743364))  
16  
17  
18  
19  
20  
21  
22  
23  
24  
25  
26  
27  
28  
29  
30  
31  
32  
33  
34  
35  
36  
37  
38  
39  
40  
41  
42  
43  
44  
45  
46  
47  
48  
49  
50  
51  
52  
53  
54  
55  
56  
57  
58  
59  
60

1  
2  
3  
4  
5  
6  
7  
8  
9  
10  
11  
12  
13  
14  
15  
16  
17  
18  
19  
20  
21  
22  
23  
24  
25  
26  
27  
28  
29  
30  
31  
32  
33  
34  
35  
36  
37  
38  
39  
40  
41  
42  
43  
44  
45  
46  
47  
48  
49

O'Donnell et al.

**Supporting the use of theory in cross-country health services research: Normalisation Process Theory as an example**

**Reporting Checklist.**

**Checklist used:** Smith L, Rosenzweig L, Schmidt M. Best practices in the reporting of participatory action research: Embracing both the forest and the trees. The Counseling Psychologist 2010;**38**(8):1115-38

**Guidelines for the reporting of participatory action research (PAR).**

| Criteria from Smith et al                    | As reported in O'Donnell et al                                                                                                                                                                                                                                                                                                                                                                                                                                                                                                                                                                                                                                                                                                                         |
|----------------------------------------------|--------------------------------------------------------------------------------------------------------------------------------------------------------------------------------------------------------------------------------------------------------------------------------------------------------------------------------------------------------------------------------------------------------------------------------------------------------------------------------------------------------------------------------------------------------------------------------------------------------------------------------------------------------------------------------------------------------------------------------------------------------|
| <b>Organisational structure of the paper</b> | <p>We have based the organizational structure of our paper on the guidance issued by BMJ Open. We have, therefore, reported using the structure of Introduction, Methods, Results, Discussion.</p> <p>While we have sought to match the content of each section to the general expectations of the BMJ Open audience, the Methods section contains a more descriptive account on the way that the training programme evolved and developed in response to the needs of the research team.</p> <p>Again, the discussion section moves beyond a conventional discussion and is the place where we include our generic recommendations which, we believe, could be applied to the development of training in the use of other theoretical frameworks.</p> |
| <b>Key elements of the project</b>           | <p>Please note: in the application of this checklist, the term 'project' is taken to apply to the training programme in the use of NPT (hereafter described as the 'NPT training programme', which is the subject of this paper. Where necessary, we also refer to RESTORE, which was the FP7 funded research project that the NPT training programme was designed to support. We hope this</p>                                                                                                                                                                                                                                                                                                                                                        |

|                                                  |                                                                                                                                                                                                                                                                                                                                                                                                                                                                                                                                                                                                                                                                                                                                                                                                                                                                                                                                                                                                                                                                                                                                                                                                                                                                                                                                                              |
|--------------------------------------------------|--------------------------------------------------------------------------------------------------------------------------------------------------------------------------------------------------------------------------------------------------------------------------------------------------------------------------------------------------------------------------------------------------------------------------------------------------------------------------------------------------------------------------------------------------------------------------------------------------------------------------------------------------------------------------------------------------------------------------------------------------------------------------------------------------------------------------------------------------------------------------------------------------------------------------------------------------------------------------------------------------------------------------------------------------------------------------------------------------------------------------------------------------------------------------------------------------------------------------------------------------------------------------------------------------------------------------------------------------------------|
|                                                  | distinction is clear in our responses below.                                                                                                                                                                                                                                                                                                                                                                                                                                                                                                                                                                                                                                                                                                                                                                                                                                                                                                                                                                                                                                                                                                                                                                                                                                                                                                                 |
| How was the project initiated?                   | <p>The NPT training programme was initiated in response to the needs of the RESTORE research team, to support them in their understanding and use of the theoretical framework being used. This is described in the paper as follows:</p> <p><b>Introduction, Page 7:</b> Research teams must be comfortable and aligned with the use of the selected theory and in agreement about the meaning and application of its individual components or constructs. Such challenges are enhanced when teams are working in different settings, countries and across language as construct understanding and implementation are likely to be both culturally and context-dependent. This mirrors challenges identified in conducting qualitative research across different settings.<sup>26</sup> These challenges faced the EU-funded RESTORE project, a multi-site implementation study across six European countries (Box 1).<sup>27</sup> Focussed on cross-cultural communication in primary care, the design and analysis of RESTORE was underpinned throughout by a recognised theoretical framework - Normalisation Process Theory (NPT). However, the application of theory to a research study was a new concept for many members of the team. As a result, we had to develop a training programme to familiarise and support the team in this process.</p> |
| What was the project's timeframe?                | <p>The RESTORE project was a 48-month project (see Figure 1); the NPT training programme was initiated at month 8 and ran in tandem with the project. This is described on Page 12 and illustrated in Figure 2:</p> <p><b>Methods, Page 12: Application of theory to the RESTORE study</b></p> <p>As described previously, the RESTORE project was designed in three, inter-related stages (Figure 1). Although not entirely linear, the study was designed to broadly align to the four constructs of NPT (Figure 2). Stage 1 focused on familiarisation, first on the broad need to apply theory to RESTORE and then, with NPT itself. Stage 2 mapped to coherence and cognitive participation; Stage 3 mapped to collective action and reflexive monitoring. This structure then influenced the design of the training for the team, which is now described in detail.</p>                                                                                                                                                                                                                                                                                                                                                                                                                                                                                |
| Who were the participants and/or co-researchers? | <p>The participants were the 19 members of the RESTORE research team. They were also the co-researchers in the design, application and evaluation of the NPT training programme. The team consisted of the senior academics who wrote the RESTORE funding application and the researchers who were employed on RESTORE. The team was multi-professional and multi-disciplinary, consisting of academic general practitioners/family doctors, anthropologists, social</p>                                                                                                                                                                                                                                                                                                                                                                                                                                                                                                                                                                                                                                                                                                                                                                                                                                                                                     |

1  
2  
3  
4  
5  
6  
7  
8  
9  
10  
11  
12  
13  
14  
15  
16  
17  
18  
19  
20  
21  
22  
23  
24  
25  
26  
27  
28  
29  
30  
31  
32  
33  
34  
35  
36  
37  
38  
39  
40  
41  
42  
43  
44  
45  
46  
47  
48  
49

|                                                                                  |                                                                                                                                                                                                                                                                                                                                                                                                                                                                                                                                                                                                                                                                                                                                                                                                                                                                                                                                                                                                                                                                                                                                                                                                                                      |
|----------------------------------------------------------------------------------|--------------------------------------------------------------------------------------------------------------------------------------------------------------------------------------------------------------------------------------------------------------------------------------------------------------------------------------------------------------------------------------------------------------------------------------------------------------------------------------------------------------------------------------------------------------------------------------------------------------------------------------------------------------------------------------------------------------------------------------------------------------------------------------------------------------------------------------------------------------------------------------------------------------------------------------------------------------------------------------------------------------------------------------------------------------------------------------------------------------------------------------------------------------------------------------------------------------------------------------|
|                                                                                  | <p>scientists and health services/primary care researchers.</p> <p>The composition of the team is described in the <b>abstract</b>, in <b>Methods page 9</b> and more fully in <b>Supplementary File 1</b>.</p> <p><b>Abstract: Participants:</b> RESTORE research team consisting 8 project applicants, all senior primary care academics; 10 researchers. Professional backgrounds included 7 academic general practitioners; 4 social/cultural anthropologists; 4 sociologists; 3 health services/primary care researchers.</p> <p><b>Methods, Page 9: The RESTORE Team</b></p> <p>The research team included research and clinical disciplines, with a wide range of expertise and knowledge of the chosen theoretical framework (Supplementary File 1). Three country teams (Austria, Greece and the Netherlands) had no experience of using NPT. Four team members (MacFarlane, Mair, Dowrick and O'Donnell) had extensive experience of using NPT<sup>33-36</sup> including applying NPT prospectively to complex interventions.<sup>29 37-39</sup> These four team members thus formed the NPT trainers group, leading the development and delivery of the training reported here.</p>                                       |
| <p>What was the extent of their participation and the nature of their roles?</p> | <p>Four members of the team were experienced in the application of NPT to research projects and so took on the role of NPT programme trainers. The other members of the team were fully engaged in th training programme, first by participating in the NPT training programme and second, by their feedback and reflection on the process. Importantly, it was their feedback on the training that led to the continual development and evolution of the training programme.</p> <p>This is reported at various points of the paper, including:</p> <p><b>Methods, Pages 13 – 17:</b> See paper for text.</p> <p><b>Results, Pages 17 – 19:</b> See paper for text.</p> <p><b>Discussion, Page 22:</b> Throughout our training programme, we allowed ample time for concerns to be raised and discussed and for the team to develop solutions. An advantage of the time spent of training was apparent, however, later in the project as we moved onto coding the qualitative data generated across multiple sites. By then, the time spent in early training ensured that the team had a much clearer and consistent view of the constructs and their meaning, leading to a consistency and robustness in coding and analysis.</p> |



|                                                                                                                                                                                                                                                                                                                                           |                                                                                                                                                                                                                                                                                                                                                                                                                                                                                                                                                                                                                                                                                                                                                                                                                                                                                                                                                                                                                                                                                                                                                                                                                                                                                                                                                                                                                                                                                                                                                                                                                                                                                                                                                                                                                                                                                                                                                                                                                                                                                                                                                                                                                                                                                                                                                                                                                                                                                                                                                                                                                                                                       |
|-------------------------------------------------------------------------------------------------------------------------------------------------------------------------------------------------------------------------------------------------------------------------------------------------------------------------------------------|-----------------------------------------------------------------------------------------------------------------------------------------------------------------------------------------------------------------------------------------------------------------------------------------------------------------------------------------------------------------------------------------------------------------------------------------------------------------------------------------------------------------------------------------------------------------------------------------------------------------------------------------------------------------------------------------------------------------------------------------------------------------------------------------------------------------------------------------------------------------------------------------------------------------------------------------------------------------------------------------------------------------------------------------------------------------------------------------------------------------------------------------------------------------------------------------------------------------------------------------------------------------------------------------------------------------------------------------------------------------------------------------------------------------------------------------------------------------------------------------------------------------------------------------------------------------------------------------------------------------------------------------------------------------------------------------------------------------------------------------------------------------------------------------------------------------------------------------------------------------------------------------------------------------------------------------------------------------------------------------------------------------------------------------------------------------------------------------------------------------------------------------------------------------------------------------------------------------------------------------------------------------------------------------------------------------------------------------------------------------------------------------------------------------------------------------------------------------------------------------------------------------------------------------------------------------------------------------------------------------------------------------------------------------------|
| <p>1<br/>2<br/>3<br/>4<br/>5<br/>6<br/>7<br/>8<br/>9<br/>10<br/>11<br/>12<br/>13<br/>14<br/>15<br/>16<br/>17<br/>18<br/>19<br/>20<br/>21<br/>22<br/>23<br/>24<br/>25<br/>26<br/>27<br/>28<br/>29<br/>30<br/>31<br/>32<br/>33<br/>34<br/>35<br/>36<br/>37<br/>38</p> <p>What was the process within and/or methodology of the project?</p> | <p>The methodology of the work was informed by Participatory Learning and Action (PLA), mirroring the use of PLA in the wider RESTORE project itself. Throughout, we collected qualitative data from the RESTORE team on their views of the training sessions, analysed these data thematically and used the findings to inform the design of later training sessions. This is described in the paper:</p> <p><b>Methods, Page 14:</b> This approach, however, proved too prescriptive and over-whelming for team members trying to assimilate knowledge about applying theory to research (see Results). This led to several important modifications in the development of the training. In consultation with our PLA experts (MO'RdeB and TdeB), we incorporated more PLA-informed exercises and approaches into the training.<sup>42</sup> Consequently, later sessions had one or at most two short didactic presentations, with the remaining time spent on participatory exercises. The training content was aligned more closely to the temporal arrangement of the project itself and linked to the over-arching constructs of NPT. Thus, we focused principally on sense-making (coherence) and engagement work (cognitive participation) first, before turning to the actual work undertaken (collective action) and, finally, monitoring and appraisal work (reflexive monitoring) (Figure 2).</p> <p><b>Methods, Pages 16-17: Evaluation of the NPT training content</b></p> <p>Face-to-face training was evaluated qualitatively at the end of each training day. Methods included: written lists of the 3 most positive and 3 most negative features of the training; speed evaluation where each participant was given two minutes to verbally record which aspects of training had, or had not, been effective for them; scoring elements of the training on a Likert scale (e.g. from 1 = very poor to 5 = very good). These data were collected either as short written comments or recorded on a digital recorder. Trainers reviewed the feedback thematically and used it to inform subsequent training sessions. Additional evaluation was conducted approximately three weeks after the first session, when the team were emailed a short set of questions asking what had worked well; what had not worked well; and what they wanted from future training sessions. The results of the evaluations were summarised and fed back at RESTORE Consortium meetings providing researchers with a further opportunity to comment on whether they believed all the key issues or suggestions regarding training had been captured and addressed.</p> |
| <p>39<br/>40<br/>41<br/>42<br/>43<br/>44<br/>45<br/>46<br/>47<br/>48<br/>49</p> <p>What were the project outcomes and/or</p>                                                                                                                                                                                                              | <p>Training outcomes were increased confidence and comfort amongst the RESTORE research team</p>                                                                                                                                                                                                                                                                                                                                                                                                                                                                                                                                                                                                                                                                                                                                                                                                                                                                                                                                                                                                                                                                                                                                                                                                                                                                                                                                                                                                                                                                                                                                                                                                                                                                                                                                                                                                                                                                                                                                                                                                                                                                                                                                                                                                                                                                                                                                                                                                                                                                                                                                                                      |

|                                                                                        |                                                                                                             |                                                                                                                                                                                                                                                                                                                                                                                                                                                                                       |
|----------------------------------------------------------------------------------------|-------------------------------------------------------------------------------------------------------------|---------------------------------------------------------------------------------------------------------------------------------------------------------------------------------------------------------------------------------------------------------------------------------------------------------------------------------------------------------------------------------------------------------------------------------------------------------------------------------------|
| 1<br>2<br>3<br>4<br>5<br>6                                                             | emergent actions?                                                                                           | in (i) the use of theory in health services research projects; (ii) understanding of NPT.                                                                                                                                                                                                                                                                                                                                                                                             |
| 7<br>8<br>9                                                                            | What comes next (if the project is on-going)?                                                               | The RESTORE project is now finished. We hope, however, that this paper and our generic recommendations can be used to support training for other health service research projects whether they are using NPT or another theoretical framework. See <b>Discussion, Page 21</b> .                                                                                                                                                                                                       |
| 10<br>11<br>12<br>13                                                                   | Consider charts, guidelines, tables, graphics to convey part or all of the project design                   | We have illustrated our data with a number of Figures and Illustrations.                                                                                                                                                                                                                                                                                                                                                                                                              |
| 14<br>15                                                                               |                                                                                                             |                                                                                                                                                                                                                                                                                                                                                                                                                                                                                       |
| 16                                                                                     | <b>Convey the experiences of the co-researchers</b>                                                         |                                                                                                                                                                                                                                                                                                                                                                                                                                                                                       |
| 17<br>18<br>19                                                                         | Pay attention to who is writing the article and how their voices and experiences are represented            | Although the lead author (COD) was one of the trainers, the paper has actively involved all members of the team. Therefore, we believe that all the voices of the RESTORE team are represented in this work.                                                                                                                                                                                                                                                                          |
| 20<br>21<br>22                                                                         | Pay attention to who is <i>not</i> writing the article and how their voices and experiences are represented | See above.                                                                                                                                                                                                                                                                                                                                                                                                                                                                            |
| 23<br>24<br>25<br>26<br>27<br>28<br>29<br>30                                           | What were the personal outcomes of the project?                                                             | A principal aim was to increase individuals' knowledge, expertise and confidence both in the use of theory in health services research projects more generally, and in the use of NPT in particular. We believe that we evidence that these personal outcomes were met. In addition, the team's level of understanding and confidence had the unintended consequence of aiding later processes within the RESTORE project such as cross-country qualitative data coding and analysis. |
| 31<br>32                                                                               |                                                                                                             |                                                                                                                                                                                                                                                                                                                                                                                                                                                                                       |
| 33<br>34                                                                               | <b>Address the challenges, pitfalls, and limitations of the project</b>                                     |                                                                                                                                                                                                                                                                                                                                                                                                                                                                                       |
| 35<br>36<br>37<br>38<br>39<br>40<br>41<br>42<br>43<br>44<br>45<br>46<br>47<br>48<br>49 | What were they?                                                                                             | We have discussed the general strengths and limitations of the project in the discussion:<br><b>Discussion, Page 23: Strengths and Limitations</b><br>This training programme in the use of a mid-level theory was developed for a multi-disciplinary team working across 6 European countries; thus, it also had to pay careful attention to both language and cultural differences across the RESTORE research team. The evaluation and careful                                     |

|                               |                                                                                                                                                                                                                                                                                                                                                                                                                                                                                                                                                                                                                                                                                                                                                                                                                                                                                                                                                                                                                                                                                                                                                                                                                                                                                                                                                                                                                                                                                                                                                                                                                                                                                                                                                                                                                                                                                        |
|-------------------------------|----------------------------------------------------------------------------------------------------------------------------------------------------------------------------------------------------------------------------------------------------------------------------------------------------------------------------------------------------------------------------------------------------------------------------------------------------------------------------------------------------------------------------------------------------------------------------------------------------------------------------------------------------------------------------------------------------------------------------------------------------------------------------------------------------------------------------------------------------------------------------------------------------------------------------------------------------------------------------------------------------------------------------------------------------------------------------------------------------------------------------------------------------------------------------------------------------------------------------------------------------------------------------------------------------------------------------------------------------------------------------------------------------------------------------------------------------------------------------------------------------------------------------------------------------------------------------------------------------------------------------------------------------------------------------------------------------------------------------------------------------------------------------------------------------------------------------------------------------------------------------------------|
|                               | <p>monitoring of both the development and delivery of the training is a clear strength of this work. That the training programme was acceptable to such a diverse group is another strength. Weaknesses include the small group of researchers involved, although the team did include a range of disciplinary and research backgrounds. The training was focused on the use of only one theoretical framework – NPT – but we believe that the lessons learned from this and the recommendations arising from the work are applicable to other theoretical frameworks.</p>                                                                                                                                                                                                                                                                                                                                                                                                                                                                                                                                                                                                                                                                                                                                                                                                                                                                                                                                                                                                                                                                                                                                                                                                                                                                                                             |
| <p>How were they managed?</p> | <p>A particular challenge in the training programme was managing the different levels of knowledge and expertise within the team. One important lesson was the need to build in time for critical reflection and discussion of the process – this is discussed within the Results section.</p> <p><b>Results, Page 18:</b> Interactive exercises and role play designed to focus on coherence and cognitive participation also spontaneously picked up issues relating to collective action (who would actually do the work; how would it be funded) and reflexive monitoring (how would teams know if professional interpreters had an impact). This served as an important reminder that, even when NPT sensitising questions from researchers were designed to focus on sense-making and engagement, other issues would naturally emerge in the discussion, emphasising the lack of linearity in the application of theory to data generation.</p> <p>On-going telephone and email contact ensured that difficulties and tensions were quickly surfaced, particularly when theory was being applied to fieldwork. Training at month 20 began with an intensive de-briefing, where in-country teams were encouraged to freely discuss their concerns and challenges arising from using NPT. These focussed on two, related, concerns. There was a continued lack of confidence in their knowledge of NPT itself and of being able to correctly map issues and data generated in the field to the NPT constructs. However, the use of visual methods of collecting and displaying data generated during the interactive group exercises, as exemplified in PLA approaches,<sup>42</sup> meant that the trainers could quickly identify a high degree of fidelity in the assignment of data to NPT constructs, thus reassuring the team of their knowledge development (Figure 4).</p> |
| <p>What can we learn?</p>     | <p>We believe that a key message from our work is the set of generic recommendations which could be applied to other training programmes seeking to support the use of theory in health services research projects. These are detailed in the <b>Discussion, pages 21 – 23.</b></p>                                                                                                                                                                                                                                                                                                                                                                                                                                                                                                                                                                                                                                                                                                                                                                                                                                                                                                                                                                                                                                                                                                                                                                                                                                                                                                                                                                                                                                                                                                                                                                                                    |

# BMJ Open

## Supporting the use of theory in cross-country health services research: A participatory qualitative approach using Normalisation Process Theory as an example

|                                 |                                                                                                                                                                                                                                                                                                                                                                                                                                                                                                                                                                                                                                                                                                                                                                                                                                                                                                                                                                                                                                                                                                                                                                                                                                                                                                                                                                                                                                                                                                                                                                                                                                                                                                                                                                                                                                                                                                                                                                                                                           |
|---------------------------------|---------------------------------------------------------------------------------------------------------------------------------------------------------------------------------------------------------------------------------------------------------------------------------------------------------------------------------------------------------------------------------------------------------------------------------------------------------------------------------------------------------------------------------------------------------------------------------------------------------------------------------------------------------------------------------------------------------------------------------------------------------------------------------------------------------------------------------------------------------------------------------------------------------------------------------------------------------------------------------------------------------------------------------------------------------------------------------------------------------------------------------------------------------------------------------------------------------------------------------------------------------------------------------------------------------------------------------------------------------------------------------------------------------------------------------------------------------------------------------------------------------------------------------------------------------------------------------------------------------------------------------------------------------------------------------------------------------------------------------------------------------------------------------------------------------------------------------------------------------------------------------------------------------------------------------------------------------------------------------------------------------------------------|
| Journal:                        | <i>BMJ Open</i>                                                                                                                                                                                                                                                                                                                                                                                                                                                                                                                                                                                                                                                                                                                                                                                                                                                                                                                                                                                                                                                                                                                                                                                                                                                                                                                                                                                                                                                                                                                                                                                                                                                                                                                                                                                                                                                                                                                                                                                                           |
| Manuscript ID                   | bmjopen-2016-014289.R1                                                                                                                                                                                                                                                                                                                                                                                                                                                                                                                                                                                                                                                                                                                                                                                                                                                                                                                                                                                                                                                                                                                                                                                                                                                                                                                                                                                                                                                                                                                                                                                                                                                                                                                                                                                                                                                                                                                                                                                                    |
| Article Type:                   | Research                                                                                                                                                                                                                                                                                                                                                                                                                                                                                                                                                                                                                                                                                                                                                                                                                                                                                                                                                                                                                                                                                                                                                                                                                                                                                                                                                                                                                                                                                                                                                                                                                                                                                                                                                                                                                                                                                                                                                                                                                  |
| Date Submitted by the Author:   | 23-Feb-2017                                                                                                                                                                                                                                                                                                                                                                                                                                                                                                                                                                                                                                                                                                                                                                                                                                                                                                                                                                                                                                                                                                                                                                                                                                                                                                                                                                                                                                                                                                                                                                                                                                                                                                                                                                                                                                                                                                                                                                                                               |
| Complete List of Authors:       | <p>O'Donnell, Kate; University of Glasgow, General Practice &amp; Primary Care<br/> Mair, Frances; University of Glasgow, General Practice and Primary Care<br/> Dowrick, CF; University of Liverpool, Institute of Psychology, Health and Society<br/> O'Reillyde Brun, Mary; NUI Galway, Discipline of General Practice<br/> de Brún, Tomas; NUI Galway, Discipline of General Practice<br/> Burns, Nicola; University of Glasgow, General Practice and Primary Care,<br/> Institute of Health &amp; Wellbeing, College of Medical, Veterinary and Life<br/> Sciences; Lancaster University, Lancaster Medical School, Faculty of Health<br/> and Medicine, Furness College<br/> Lionis, Christos; Medical Faculty, University of Crete, Greece,<br/> Saridaki, Aristeia; Medical Faculty, University of Crete, Greece<br/> Papadakaki, Maria; Technological Educational Institute of Crete,<br/> Department of Social Work; Medical Faculty, University of Crete, Greece<br/> van den Muijsenbergh, Maria; Radboud University Nijmegen Medical<br/> Centre, Department of Primary and Community Care; Pharos Centre of<br/> Expertise on Health Disparities<br/> van Weel-Baumgarten, Evelyn; Radboud University Nijmegen Medical<br/> Centre, Department of Primary and Community Care<br/> Gravenhorst, Katja; University of Liverpool, Institute of Psychology, Health<br/> and Society<br/> Cooper, Lucy<br/> Princz, Christine; Medical University of Vienna, Centre for Public Health<br/> Teunissen, Erik; Radboud university medical center, Department of Primary<br/> and Community Care, Nijmegen, Netherlands<br/> van den Driessen Mareeuw, Francine; Radboud university medical center,<br/> Department of Primary and Community Care, Nijmegen, Netherlands<br/> Vlachadi, Maria; University of Crete, Department of Political Sciences<br/> Spiegel, Wolfgang; Medical University of Vienna, Centre for Public Health<br/> Macfarlane, Anne; University of Limerick, Graduate Entry Medical School</p> |
| <b>Primary Subject Heading</b>: | Health services research                                                                                                                                                                                                                                                                                                                                                                                                                                                                                                                                                                                                                                                                                                                                                                                                                                                                                                                                                                                                                                                                                                                                                                                                                                                                                                                                                                                                                                                                                                                                                                                                                                                                                                                                                                                                                                                                                                                                                                                                  |
| Secondary Subject Heading:      | Research methods, Qualitative research                                                                                                                                                                                                                                                                                                                                                                                                                                                                                                                                                                                                                                                                                                                                                                                                                                                                                                                                                                                                                                                                                                                                                                                                                                                                                                                                                                                                                                                                                                                                                                                                                                                                                                                                                                                                                                                                                                                                                                                    |
| Keywords:                       | Theory, Training, Health services research, Normalisation Process Theory                                                                                                                                                                                                                                                                                                                                                                                                                                                                                                                                                                                                                                                                                                                                                                                                                                                                                                                                                                                                                                                                                                                                                                                                                                                                                                                                                                                                                                                                                                                                                                                                                                                                                                                                                                                                                                                                                                                                                  |
|                                 |                                                                                                                                                                                                                                                                                                                                                                                                                                                                                                                                                                                                                                                                                                                                                                                                                                                                                                                                                                                                                                                                                                                                                                                                                                                                                                                                                                                                                                                                                                                                                                                                                                                                                                                                                                                                                                                                                                                                                                                                                           |

1  
2  
3  
4  
5  
6  
7  
8  
9  
10  
11  
12  
13  
14  
15  
16  
17  
18  
19  
20  
21  
22  
23  
24  
25  
26  
27  
28  
29  
30  
31  
32  
33  
34  
35  
36  
37  
38  
39  
40  
41  
42  
43  
44  
45  
46  
47  
48  
49  
50  
51  
52  
53  
54  
55  
56  
57  
58  
59  
60

SCHOLARONE™  
Manuscripts

For peer review only

1  
2  
3 **Supporting the use of theory in cross-country health services research: A participatory qualitative**  
4  
5 **approach using Normalisation Process Theory as an example**  
6  
7

8  
9 **Catherine A O'Donnell<sup>1\*</sup>, Frances S Mair<sup>1</sup>, Christopher Dowrick<sup>2</sup>, Mary O'Reilly-de Brún<sup>3</sup>, Tomas de**  
10 **Brún<sup>3</sup>, Nicola Burns<sup>1,4</sup>, Christos Lionis<sup>5</sup>, Aristoula Saridaki<sup>5</sup>, Maria Papadakaki<sup>5,6</sup>, Maria van den**  
11 **Muijsenbergh<sup>7,8</sup>, Evelyn van Weel-Baumgarten<sup>7</sup>, Katja Gravenhorst<sup>2</sup>, Lucy Cooper<sup>2</sup>, Christine**  
12 **Princz<sup>9</sup>, Erik Teunissen<sup>7</sup>, Francine van den Driessen Mareeuw<sup>7</sup>, Maria Vlahadi<sup>5</sup>, Wolfgang Spiegel<sup>9</sup>,**  
13  
14  
15  
16  
17 **and Anne MacFarlane<sup>10</sup>**  
18  
19

- 20  
21  
22  
23 1. General Practice and Primary Care, Institute of Health and Wellbeing, College of MVLS, University  
24 of Glasgow, 1 Horselethill Road, Glasgow, Scotland, G12 9LX, UK  
25  
26  
27 2. Institute of Psychology, Health and Society, University of Liverpool, Waterhouse Building, Block B,  
28 1st Floor, 1-5 Brownlow Street, Liverpool, L69 3GL, UK  
29  
30  
31 3. Discipline of General Practice, School of Medicine, National University of Ireland, Galway, Ireland  
32  
33 4. Faculty of Health and Medicine, Lancaster Medical School, Furness College, University of  
34 Lancaster, Lancaster, UK  
35  
36  
37 5. Faculty of Medicine, University of Crete, Heraklion, Greece  
38  
39  
40 6. Department of Social Work, School of Health and Social Welfare, Technological Educational  
41 Institute of Crete, Heraklion, Crete  
42  
43  
44 7. Department of Primary and Community Care, Radboud University Nijmegen Medical Centre,  
45 Nijmegen, The Netherlands  
46  
47  
48 8. Pharos Centre of Expertise on Health Disparities, Utrecht, The Netherlands  
49  
50  
51 9. Centre for Public Health, Medical University of Vienna, Vienna, Austria  
52  
53 10. Graduate Entry Medical School, University of Limerick, Limerick, Ireland  
54

55 **\*Corresponding Author**

56 **Email: Kate.O'Donnell@glasgow.ac.uk; Tel: +44 141 330 8329.**  
57  
58  
59  
60

1  
2  
3  
4  
5  
6  
7  
8  
9  
10  
11  
12  
13  
14  
15  
16  
17  
18  
19  
20  
21  
22  
23  
24  
25  
26  
27  
28  
29  
30  
31  
32  
33  
34  
35  
36  
37  
38  
39  
40  
41  
42  
43  
44  
45  
46  
47  
48  
49  
50  
51  
52  
53  
54  
55  
56  
57  
58  
59  
60

For peer review only

## Abstract

**Objectives:** To describe and reflect on the process of designing and delivering a training programme supporting the use of a theoretical framework, Normalisation Process Theory (NPT), in a multi-site cross-country health services research study.

**Design:** Participatory research approach utilising qualitative methods.

**Setting:** Six European primary care settings involving research teams from Austria, England, Greece, Ireland, The Netherlands and Scotland.

**Participants:** RESTORE research team consisting of 8 project applicants, all senior primary care academics; and 10 researchers. Professional backgrounds included general practitioners/family doctors; social/cultural anthropologists; sociologists; health services/primary care researchers.

**Primary outcome measures:** Views of all research team members (n=18) were assessed using qualitative evaluation methods, analysed qualitatively by the trainers after each session.

**Results:** Most of the team had no experience of using NPT and many had not applied a theoretical framework to prospective, qualitative research projects. Early training proved didactic and overloaded participants with information. Drawing on RESTORE's methodological approach of Participatory Learning and Action, workshops using role play, experiential interactive exercises and light-hearted examples not directly related to the study subject matter were developed. Evaluation showed the study team quickly grew in knowledge and confidence in applying theory to fieldwork. Recommendations applicable to other studies include: accepting that theory application is not a linear process; that time is needed to address researcher concerns with the process; and that experiential, interactive learning is a key device in building conceptual and practical knowledge. An unanticipated benefit was the smooth transition to cross-country qualitative coding of study data.

**Conclusion** A structured programme of training enhanced and supported the prospective application of a theory, NPT, to our work, but raised challenges. These were not unique to NPT, but could arise



1  
2  
3  
4  
5  
6  
7  
8  
9  
10  
11  
12  
13  
14  
15  
16  
17  
18  
19  
20  
21  
22  
23  
24  
25  
26  
27  
28  
29  
30  
31  
32  
33  
34  
35  
36  
37  
38  
39  
40  
41  
42  
43  
44  
45  
46  
47  
48  
49  
50  
51  
52  
53  
54  
55  
56  
57  
58  
59  
60

with any theoretical framework, especially in large multi-site, international projects. The lessons learned are applicable to other theoretically-informed studies.

**Keywords**

Theory; Health services research; Training; Normalisation Process Theory.

For peer review only

### Strengths and Limitations

- The training programme was developed to support the use of a mid-level theoretical framework in 6 European countries with different primary care systems and cultures.
- Training development, delivery and evaluation engaged with a multidisciplinary team of clinical and non-clinical researchers encompassing multiple professional disciplines.
- Evaluation and careful monitoring of the training alerted us to delivery challenges and facilitated the development of a participatory approach to learning.
- The group of researchers involved in the design and feedback evaluation was relatively small.
- Training focused on one theoretical framework – Normalisation Process Theory – but has resulted in a set of generic recommendations.

## Introduction

Bridging the research to practice gap is a recognised problem in health services research.<sup>1,2</sup> One important solution is to underpin such research with strong theoretical approaches.<sup>1,3,4</sup> Advantages include providing a framework that is generalizable across settings and individuals; incremental generation of knowledge; and a guide for analysis.<sup>3,5,6</sup> Theory can also enhance our understanding of the barriers to research translation and implementation and alert us to the context into which new interventions and services are placed.<sup>6-9</sup> However, many interventions and services are implemented with little or no attention to theory.<sup>3,5</sup> When theoretical frameworks are used, they often guide analysis rather than inform the design and conduct of the overall study.<sup>5,10,11</sup> This may be due, in part, to recognised challenges in applying theory to health services research.

## Challenges in using theory in health services research

The first challenge is a lack of conceptual clarity as to what a 'theory' is. MacDonald describes theory as "an organized, heuristic, coherent, and systematic articulation of a set of statements related to significant questions ..... providing a generalizable form of understanding".<sup>12</sup> There are three recognised levels of 'theory'. Grand theory is abstract and broadly applicable across different areas and subjects.<sup>6,12,13</sup> The next level – mid-range or 'big theory' – is less abstract, addressing specific phenomena and concepts that can be incorporated into testable propositions or questions and inform intervention development.<sup>6,12</sup> The third level, programme theory, is often considered as 'small' theory, specifying particular components of an intervention in logic models and explicitly linking a programme's processes and inputs to its intended outcomes.<sup>6,14</sup>

The second challenge is to decide which theory best informs the work being conducted. For example, theory can focus on: explaining individual behaviours and responses (e.g. Theory of Planned Behaviour); understanding organisational responses (e.g. Diffusion of Innovation); dissemination (e.g. Streams of Policy Process); or implementation (e.g. Promoting Action on

1  
2  
3 Research Implementation in Health Services or PARIHS).<sup>15</sup> While theoretical choice is informed by  
4  
5 the research, the disciplinary composition and background of the research team is also influential.<sup>16</sup>  
6  
7 <sup>17</sup> Health services research is often multidisciplinary and draws on many fields including sociology,  
8  
9 psychology, biostatistics, health economics and clinical disciplines. This requires teams to  
10  
11 understand and respect each other's theoretical and paradigmatic positions.<sup>3</sup> The final challenge is a  
12  
13 lack of guidance in applying theory to studies.<sup>7 18</sup>  
14  
15

### 16 17 18 19 **The application of theory in practice**

20  
21 Consideration has been given to how research teams could apply theory in practice. For example,  
22  
23 the Reach, Effectiveness, Adoption, Implementation and Maintenance (RE-AIM) framework was  
24  
25 developed for use in the evaluation of public health programmes and interventions but is now  
26  
27 widely applied.<sup>19 20</sup> RE-AIM focuses researchers' attention on: population reach; the intervention's  
28  
29 adoption, implementation and effectiveness; and, finally, on its maintenance in practice.<sup>20</sup> The  
30  
31 developers of Re-AIM have released training and support for other researchers (<http://www.re-aim.hnfe.vt.edu/>).  
32  
33 However, even with such training available, it is not always applied consistently.  
34  
35 Gaglio identified 71 papers published between 1999-2010 that used RE-AIM;<sup>20</sup> of these, 'reach' was  
36  
37 the most frequently reported dimension, with 'maintenance' reported least often. There was also  
38  
39 variation in the reporting of the individual components of each construct. Most reporting was  
40  
41 quantitative, with little qualitative research to explore how components were used or understood.  
42  
43  
44  
45 Similar results were reported for the PARIHS framework, which describes several interacting  
46  
47 components including clinical and patient experience; local context; culture and leadership; and  
48  
49 facilitation.<sup>21</sup> Again, there was variation in its use across studies, with a lack of detail on the  
50  
51 application of different sub-components to fieldwork.<sup>18 22</sup> Two other reviews examined the  
52  
53 application of the Knowledge to Action (KTA) Framework<sup>23</sup> and Normalisation Process Theory<sup>24</sup> to  
54  
55 implementation studies. In both, the authors found stability in the application of the high level  
56  
57  
58  
59  
60

1  
2  
3 constructs across studies but, again, variation in researchers' attention to the sub-constructs of  
4  
5 each. This lack of 'theory fidelity' has been raised in other fields, notably health promotion.<sup>23 25</sup>  
6

7  
8 Translating the constructs of a chosen theory into interventions can be challenging, especially when  
9  
10 applied across multiple research sites.<sup>5 7 23</sup> Research teams must be comfortable and aligned with the  
11  
12 use of the selected theory and in agreement about the meaning and application of its individual  
13  
14 components or constructs. Such challenges are enhanced when teams are working in different  
15  
16 settings, countries and across cultural and language boundaries as construct understanding and  
17  
18 implementation are likely to be both culturally and context-dependent. This mirrors challenges  
19  
20 identified in conducting qualitative research across different settings.<sup>26</sup> These challenges faced the  
21  
22 EU-funded RESTORE project, a multi-site implementation study across six European countries (Box  
23  
24 1).<sup>27</sup> Focused on cross-cultural communication in primary care, the design and analysis of RESTORE  
25  
26 was underpinned throughout by a recognised theoretical framework - Normalisation Process Theory  
27  
28 (NPT). However, the application of theory to a research study was a new concept for many members  
29  
30 of the team. As a result, we had to develop a training programme to familiarise and support the  
31  
32 team in this process.  
33  
34

35  
36 The aim of this paper is to describe and reflect on the process of designing training in the use of a  
37  
38 theoretical framework in a multi-site cross-country research project. We discuss the challenges this  
39  
40 brought, as well as the benefits. Finally, we make recommendations that could be applied to other  
41  
42 theoretically-driven health services research located in multiple settings, regardless of the  
43  
44 theoretical framework selected.  
45  
46  
47  
48  
49  
50  
51  
52  
53  
54  
55  
56  
57  
58  
59  
60

1  
2  
3 **Box 1. Description of the RESTORE project and its theoretical framework, Normalisation Process**  
4 **Theory.**<sup>27</sup>  
5  
6

7 **RESTORE (REsearch into implementation STRategies to support patients of different ORigins and**  
8 **language background)** was focused on the implementation of guidance and training initiatives to  
9 support cross-cultural consultations in primary care for vulnerable migrant populations: asylum  
10 seekers and refugees; migrants in low paid employment; and undocumented migrants.<sup>27 28</sup> Funded  
11 by the EU FP7 Programme, RESTORE aimed to bridge the research-practice gap by collecting  
12 empirical data on the selection, co-design and implementation of such interventions in five  
13 European primary care settings: Austria, England, Greece, Ireland, and the Netherlands. A sixth  
14 partner, Scotland, focused on the role of the policy environment and health systems of participating  
15 countries.<sup>29</sup>  
16  
17

18 RESTORE used a participatory research approach – Participatory Learning and Action (PLA) – as its  
19 over-arching methodological approach, generating rich, in-depth qualitative data.<sup>27 30 31</sup> This involved  
20 a range of stakeholders including primary care practitioners, migrant service users, community  
21 interpreters and policy makers. To shape the study approach, facilitate data collection and guide the  
22 analysis, a theoretical framework was essential. For this, we selected Normalisation Process Theory  
23 (NPT), a mid-range sociological theory concerned with the work that individuals and organisations  
24 have to carry out in order to embed and normalise new, complex ways of working into routine  
25 practice.<sup>32 33</sup> NPT operates through four principal constructs or areas of work: coherence (sense-  
26 making work); cognitive participation (engagement work); collective action (enacting work); and  
27 reflexive monitoring (appraisal work), each with its own set of sub-constructs. NPT has been applied  
28 to a range of studies,<sup>24</sup> including guideline implementation,<sup>34 35</sup> treatment burden in chronic  
29 disease<sup>36-38</sup> and evaluating models of care.<sup>8 39</sup>  
30  
31  
32  
33  
34  
35  
36  
37  
38  
39  
40  
41  
42  
43  
44  
45  
46  
47  
48  
49  
50  
51  
52  
53  
54  
55  
56  
57  
58  
59  
60

## Methods

### RESTORE study design

RESTORE was designed and implemented in three stages over 48 months (Figure 1).<sup>27</sup> Stage 1 identified and recruited key stakeholders in each country, including migrants, community interpreters, primary care practitioners and local policy-makers. An extensive mapping exercise was conducted by each in-country RESTORE team to identify guidance and training initiatives (G/TIs) supporting inter-cultural communication in primary care and to assess their initial suitability for implementation<sup>40</sup>. Stage 2 focused on engaging with local stakeholders to review the identified G/TIs and democratically select one for implementation by considering the implementation potential of each G/TI.<sup>41</sup> In Stage 3, the selected G/TI was refined by local stakeholders supported by the in-country RESTORE team, implemented by the stakeholders and RESTORE team, monitored and, where necessary, further refined to improve the chances of sustaining it in routine practice.

INSERT FIGURE 1 HERE.

Although not entirely linear, the study was designed to broadly align to the four constructs of NPT (Figure 2). Stage 1 focused on familiarisation, first on the broad need to apply theory to RESTORE and then, with NPT itself. Stage 2 mapped to coherence and cognitive participation; Stage 3 mapped to collective action and reflexive monitoring. This structure then influenced the design of the training for the team, which is described below.

INSERT FIGURE 2 HERE.

### The RESTORE Team

The research team of 18 included research and clinical disciplines, with a wide range of expertise and knowledge of the chosen theoretical framework (Supplementary File 1). Three country teams (Austria, Greece and the Netherlands) had no experience of using NPT. Four team members

1  
2  
3 (MacFarlane, Mair, Dowrick and O'Donnell) had extensive experience of using NPT<sup>39 42-44</sup> including  
4  
5 applying NPT prospectively to complex interventions.<sup>29 45-47</sup> These four team members thus formed  
6  
7 the NPT trainers group, leading the development and delivery of the training reported here.  
8  
9

### 10 11 12 **Description of the training programme** 13

14  
15 Face-to-face training sessions each lasted one day. Training content was initially developed by the  
16  
17 NPT trainers based on our knowledge of the content that needed to be covered. As time progressed,  
18  
19 however, the content was developed based on feedback and evaluation from the RESTORE team  
20  
21 members. Here we briefly describe the content of the training sessions. More detailed description of  
22  
23 the training sessions and the participatory exercises are contained in Supplementary Files 2 and 3;  
24  
25 the short presentations can be accessed on Slideshare (see Supplementary File 4 for links).  
26  
27  
28  
29  
30

### 31 ***Early project training (Months 1 to 12).*** 32

33  
34 Training began at Month 8, after the RESTORE researchers had been appointed in each country. In  
35  
36 the first session, the rationale for using theory to shape and inform research study design, data  
37  
38 collection and analysis was presented. NPT, the theory chosen to underpin RESTORE, was then  
39  
40 introduced using previous studies as examples as well as the on-line NPT toolkit  
41  
42 (<http://www.normalizationprocess.org/>). Following this, an interactive group exercise helped the  
43  
44 research team to consider what issues might arise during the implementation of professional  
45  
46 interpreters in primary care. To prompt discussion and improve understanding, the team used a set  
47  
48 of 16 NPT-informed questions developed by the NPT trainers along with TdeB. These questions were  
49  
50 also being used to guide the early stages of data analysis in the project (Table 1).<sup>31 41</sup>  
51  
52  
53  
54  
55  
56  
57  
58  
59  
60



1  
2  
3  
4  
5  
6  
7  
8  
9  
10  
11  
12  
13  
14  
15  
16  
17  
18  
19  
20  
21  
22  
23  
24  
25  
26  
27  
28  
29  
30  
31  
32  
33  
34  
35  
36  
37  
38  
39  
40  
41  
42  
43  
44  
45  
46  
47  
48  
49

Table 1. NPT constructs and sub-constructs as applied to RESTORE<sup>31 41</sup>

| Coherence                                                                                                      | Cognitive Participation                                                                                             | Collective Action                                                                                                         | Reflexive Monitoring                                                                                                |
|----------------------------------------------------------------------------------------------------------------|---------------------------------------------------------------------------------------------------------------------|---------------------------------------------------------------------------------------------------------------------------|---------------------------------------------------------------------------------------------------------------------|
| Can stakeholders make sense of the intervention?                                                               | Can stakeholders get others involved in implementing the intervention?                                              | What needs to be done to make the intervention work in practice?                                                          | Can the intervention be monitored and evaluated?                                                                    |
| <b>Differentiation:</b><br>Do stakeholders see this as a new way working?                                      | <b>Enrolment:</b><br>Do the stakeholders believe they are the correct people to drive forward the implementation?   | <b>Interactional workability:</b><br>Does the intervention make it easier or harder to complete tasks?                    | <b>Systematisation:</b><br>Will stakeholders be able to judge the effectiveness of the intervention?                |
| <b>Individual specification:</b><br>Do individuals understand what tasks the intervention requires of them?    | <b>Initiation:</b><br>Are they willing and able to engage others in the implementation?                             | <b>Skill set workability:</b><br>Do those implementing the intervention have the correct skills and training for the job? | <b>Individual appraisal:</b><br>How will individuals judge the effectiveness of the intervention?                   |
| <b>Communal specification:</b><br>Do all those involved agree about the purpose of the intervention?           | <b>Activation:</b><br>Can stakeholders identify what tasks and activities are required to sustain the intervention? | <b>Relational integration:</b><br>Do those involved in the implementation have confidence in the new way of working?      | <b>Communal appraisal:</b><br>How will stakeholders collectively judge the effectiveness of the intervention?       |
| <b>Internalisation:</b><br>Do all the stakeholders grasp the potential benefits and value of the intervention? | <b>Legitimation:</b><br>Do they believe it is appropriate for them to be involved in the intervention?              | <b>Contextual integration:</b><br>Do local and national resources and policies support the implementation?                | <b>Reconfiguration:</b><br>Will stakeholders be able to modify the intervention based on evaluation and experience? |

1  
2  
3 ***Mid-project training (Months 13 to 24).***  
4

5 At month 13, we focused on the NPT constructs of coherence (sense-making) and cognitive  
6 participation (engagement). Learning from early training, we first used a non-RESTORE 'light'  
7 example with a humorous exercise which all the team could relate to – namely, could you  
8 contemplate staying in a circus tent at a future RESTORE team meeting? (Figure 3)  
9

10  
11  
12  
13  
14  
15 INSERT FIGURE 3 HERE  
16

17 Following this, a RESTORE specific role play was employed to think through the issues of using  
18 professional interpreters in a primary care setting; this example drew on team members' own  
19 experiences of working with interpreters. Although this was designed to focus the discussion on  
20 issues relating to coherence and cognitive participation, issues relating to collective action and  
21 reflexive monitoring also arose (see Results).  
22  
23  
24  
25  
26  
27

28 By month 20, when the next face-to-face training took place, the in-country teams were preparing to  
29 commence fieldwork with their stakeholders (Stage 2 of RESTORE). Teams were given another  
30 opportunity to participate in an interactive role play. For this, a G/TI selected by one of the in-  
31 country RESTORE teams in collaboration with their stakeholders was used; some members of the  
32 RESTORE team were asked to role play the kind of discussions they might encounter in their  
33 fieldwork. The issues and questions that arose during this were recorded and mapped to the four  
34 NPT constructs by the other team members, using large wall charts and stickie notelets. The  
35 resultant mapping was then reviewed by the NPT trainers and discussed by the group.  
36  
37  
38  
39  
40  
41  
42  
43  
44  
45  
46  
47  
48

49 ***Later training sessions (Months 25 to 40).***  
50

51 By month 25, teams were conducting fieldwork and moving into Stage 3, where the chosen G/TI  
52 would be fully adapted, implemented and the result of that implementation monitored. (This  
53 process and the results are reported in<sup>41,48</sup>). Teams were now generating qualitative data about that  
54  
55  
56  
57  
58  
59  
60

1  
2  
3 process, which required the development of a coding framework broadly applicable across all the  
4  
5 participating sites. Thus, training focused both on the constructs of collective action and reflexive  
6  
7 monitoring and on the process of analysis.  
8

9  
10 To begin training in analysis, an anonymised extract of data generated from RESTORE fieldwork in  
11  
12 Ireland was selected. This was pre-circulated to the teams for coding to the four constructs and, if  
13  
14 possible, to the sub-constructs. In addition to team coding, the extract was sent to the trainers and  
15  
16 to three recognised external experts in NPT. Coded data were collated and presented at the  
17  
18 Consortium training at Month 25.  
19

20  
21 Training sessions at Months 38 and 43 continued to focus on analysis. Teams were asked to review  
22  
23 extracts of data or to bring examples of coding dilemmas with them. Coding dilemmas included  
24  
25 examples of data that researchers were concerned were being miscoded; data that did not appear  
26  
27 to fit into the NPT framework; and data that appeared to be particular to only one site. Evaluation at  
28  
29 the end of these later sessions allowed the NPT trainers to clarify the team's understanding of the  
30  
31 coding process and to address any on-going concerns through teleconferences or email.  
32  
33  
34  
35  
36

### 37 **Non face-to-face support**

38  
39 Several mechanisms were put into place to support teams in-between face-to-face sessions,  
40  
41 including buddy groups (linking teams experienced in theory use with less experienced teams);  
42  
43 telephone and video conferences; email feedback on issues and problems. Later in the project,  
44  
45 telephone and video conferences were also used to support data analysis, promoting consistency in  
46  
47 the application of theory to analysis across the participating countries.  
48  
49

50  
51 Outside the formal training sessions, we uploaded NPT relevant information such as key papers and  
52  
53 links to the NPT Toolkit website ([www.normalizationprocess.org](http://www.normalizationprocess.org)) to a shared folder accessible by all  
54  
55 the research team to serve as a resource whenever required.  
56  
57  
58  
59  
60

### **Evaluation of the NPT training content**

Face-to-face training was evaluated qualitatively at the end of each training day. Everyone present at the training days (generally all 18 members of the research team) participated in each evaluation; no one refused to participate. Methods included: written lists of the 3 most positive and 3 most negative features of the training; speed evaluation where each participant was given two minutes to verbally record which aspects of training had, or had not, been effective for them; scoring elements of the training on a Likert scale (e.g. from 1 = very poor to 5 = very good). These data were collected either as short written comments or recorded on a digital recorder. Additional evaluation was conducted approximately three weeks after the first session, when the team were emailed a short set of questions asking what had worked well; what had not worked well; and what they wanted from future training sessions. All the evaluation feedback was reviewed by the four members of the training team and the findings summarised into 'what worked', 'what didn't work' and 'what the team would like to do next'. The results of the evaluations were then summarised and presented back to the full team at the next face-to-face RESTORE Consortium meeting, providing the team with a further opportunity to comment on whether they believed all the key issues or suggestions regarding training had been captured and addressed.

### **Results**

#### ***Early project training (Months 1 to 12).***

Team evaluation indicated that the content of the first training sessions (Sessions 1 and 2, Supplementary File 2) was too didactic and prescriptive. The team felt overwhelmed trying to assimilate general knowledge about the application of theory to research along with NPT-specific information. The early use of the 16 NPT sensitising questions (Table 1) was not well liked by some researchers used to more inductive methods of working in qualitative projects. Others, particularly

1  
2  
3 the clinicians, found this approach helpful as they tried to develop their understanding of the  
4  
5 theory's different constructs.  
6

7  
8 *The 16 questions of the [NPT] toolkit gave us a better insight into what was meant by terms*  
9  
10 *like 'sense-making' 'participation' 'action' and 'monitoring'. (Buddy report from Dutch and*  
11  
12 *English teams).*  
13

### 14 15 16 17 **Mid-project training (Months 13 to 24).** 18

19  
20 As a result of team feedback on the didactic nature of the first sessions, the NPT trainers adopted a  
21  
22 more PLA-focused style for the mid-project training sessions. This also reflected the methodological  
23  
24 approach of the RESTORE project in the field, as described elsewhere.<sup>27 31</sup> Consequently, later  
25  
26 sessions had one or at most two short didactic presentations, with the remaining time spent on  
27  
28 participatory exercises. The mid-project training content was aligned more closely to the temporal  
29  
30 arrangement of the project itself and linked to the over-arching constructs of NPT. Thus, we focused  
31  
32 principally on sense-making (coherence) and engagement work (cognitive participation) first, before  
33  
34 turning to the actual work undertaken (collective action) and, finally, monitoring and appraisal work  
35  
36 (reflexive monitoring) (Figure 2).  
37

38  
39  
40 The use of a 'light' humorous exercise, the circus tent (Figure 3), where the team could concentrate  
41  
42 on the content of the theory without worrying about how it applied to future fieldwork evaluated  
43  
44 well. Exercises using practical examples grounded in the fieldwork they would have to conduct  
45  
46 during the course of the project were also helpful.  
47

48  
49 *Exercises helped a lot! Very comfortable now! (Anonymous response in written evaluation*  
50  
51 *feedback)*

52  
53 *Worked well. I'm beginning to see sense. The use of PLA methods/ techniques really helps*  
54  
55 *grasping NPT and made it digestible! (Anonymous response in written evaluation feedback)*

56  
57 Interactive exercises and role play designed to focus on coherence and cognitive participation also  
58  
59 spontaneously picked up issues relating to collective action (who would actually do the work; how  
60

1  
2  
3 would it be funded) and reflexive monitoring (how would teams know if professional interpreters  
4 had an impact). This served as an important reminder that, even when NPT sensitising questions  
5 from researchers were designed to focus on sense-making and engagement, other issues would  
6 naturally emerge in the discussion, emphasising the lack of linearity in the application of theory to  
7 data generation. This was reflected in feedback obtained from two of the in-country teams.  
8  
9  
10  
11  
12

13  
14 *Coherence and cognitive participation refer, in the main, to processes before any*  
15 *implementation work has occurred. However, we did note that the theory is fluid and not fixed*  
16 *or linear, so this means that the experience of doing the implementation work (collective*  
17 *action) and reflecting on that work (reflexive monitoring) could influence coherence and*  
18 *cognitive participation over time..... An 'aha!' moment occurred when we distilled the thinking*  
19 *in the group around the difference between cognitive participation and collective action as*  
20 *'thinking about the doing' and 'doing the doing' (Buddy Report from Greek and Irish teams).*  
21  
22  
23  
24  
25  
26  
27  
28  
29  
30  
31

32  
33 **Later training sessions (Months 25 to 40).**  
34

35 Training conducted later in the project steadily moved from using theory to inform the collection of  
36 data in the field to using theory to underpin analysis of data. Face-to-face training session at Months  
37 25 and 31 focused mainly on coding data extracts and on round-table discussion of the approach  
38 being taken. Prior to meeting at month 25, teams received an extract of data generated by the Irish  
39 team (Box 2); teams were asked to code this to the main constructs and, if possible, sub-constructs  
40 of NPT. Coding was then compared at the training session in Month 25.  
41  
42  
43  
44  
45  
46  
47  
48  
49  
50  
51  
52  
53  
54  
55  
56  
57  
58  
59  
60

**Box 2. Background to data generation by Irish team.**

MORdeB and TdeB developed training materials to support the RESTORE researchers use the methods of PLA in their fieldwork. One of these was a DVD in which researchers in Ireland role-played a discussion amongst health care professionals, policy makers, migrants' representatives and interpreters about the implementation of a training initiative to support the use of trained interpreters in primary care consultations in Ireland. Researchers were assigned these roles; the facilitator was one of RESTORE's PLA experts. The role play was filmed and the dialogue transcribed to allow teams to review and develop experience in applying NPT to coding data. This PLA training will be described more fully in future publications.

Table 2 shows examples of coding from two of the in-country teams, along with the final coding agreed by the whole RESTORE team. The first coding extract was selected because the data focused mainly on the construct of coherence, i.e. developing an understanding of the rationale for using interpreters in practice and the benefits of that. Overall, there was a high level of agreement between the team in their data coding, particularly when coding to the high-level constructs of NPT. Each in-country team showed a good degree of consistency in coding to the construct of Coherence, with some coding in particular to the sub-constructs of Differentiation ('seeing interpreters as a new way of working') and Internalisation ('articulating the benefits of working with interpreters'). The Dutch team also coded this portion of transcript to the construct Cognitive Participation, suggesting that the conversation was also discussing the need to enrol others into working with interpreters (Table 2). Face-to-face discussion at Month 25 led to a shared understanding and agreement that – where data was referring to both understanding the use of interpreters *and* considering who should be involved – then it was appropriate to double code data to both Coherence and Cognitive Participation. Likewise, where resources were referred to, for example the provision of training and DVD materials, text could be coded to Collective Action (Contextual Integration). Such discussions both helped the team refine their understanding of NPT, but also resulted in a robust coding framework which could be used across all country teams.

1  
2  
3 This process continued at later training meetings, at months 31 and 38 supplemented by telephone  
4  
5 and video conferences, where coding of data was compared and differences in interpretation  
6  
7 discussed. To facilitate this process, each country team nominated one person to lead on coding  
8  
9 qualitative data generated in that country, who then worked with the leads in the other countries to  
10  
11 review and discuss coding. Examples of coding were discussed and memos relating to data coding  
12  
13 circulated across the team, ensuring consistency of meaning and interpretation in relation to coding  
14  
15 data. The final coding frame was then reviewed and discussed at a final training meeting involving all  
16  
17 members of the RESTORE team which took place at month 43.  
18  
19  
20  
21  
22  
23  
24  
25  
26  
27  
28  
29  
30  
31  
32  
33  
34  
35  
36  
37  
38  
39  
40  
41  
42  
43  
44  
45  
46  
47  
48  
49  
50  
51  
52  
53  
54  
55  
56  
57  
58  
59  
60



1  
2  
3  
4  
5  
6  
7  
8  
9  
10  
11  
12  
13  
14  
15  
16  
17  
18  
19  
20  
21  
22  
23  
24  
25  
26  
27  
28  
29  
30  
31  
32  
33  
34  
35  
36  
37  
38  
39  
40  
41  
42  
43  
44  
45  
46  
47  
48  
49

Table 2. Coding example from a transcript: coding by in-country team and final coding after discussion

| Speaker                        | Text                                                                                                                                                                                                                                                                                                                                                                                                            | NPT Coding                                                                                                                                                                                                               |
|--------------------------------|-----------------------------------------------------------------------------------------------------------------------------------------------------------------------------------------------------------------------------------------------------------------------------------------------------------------------------------------------------------------------------------------------------------------|--------------------------------------------------------------------------------------------------------------------------------------------------------------------------------------------------------------------------|
| <b>Coding from Irish Team.</b> |                                                                                                                                                                                                                                                                                                                                                                                                                 |                                                                                                                                                                                                                          |
| Facilitator                    | So when we began this, this morning [name] as the policy person you made a very interesting comment and you started the whole ball rolling with this didn't you?                                                                                                                                                                                                                                                |                                                                                                                                                                                                                          |
| Policy maker*                  | Yeah, I suppose just reflecting on where we are at, at the moment within the health organisation is that we have a ban on travel and there's an embargo on education and <u>training initiatives</u> .<br>So something like this that provides a DVD, training and guidance is a major plus. It's something that's really going to tick the boxes for us whilst be very meaningful for front line staff as well | Coded this text to <b>Coherence (Internalisation)</b> – understands the initiative; sees benefit in it.<br>Underlined text double coded to <b>Collective Action (Contextual Integration)</b> due to mention of training. |
| Facilitator                    | Okay so it's got two real advantages there, it's going to get over the problem you have about not being able to travel, not being able to go out and do the capacity building and training because it hands it to you right on the plate, as you see it. And also it's going to be very meaningful for front line staff, and if I remember [name] you found that interesting. You had a comment about that...   |                                                                                                                                                                                                                          |
| GP*                            | Yeah I think this was mine here, so as a GP I really liked the fact that there was a resource available to me as a front line member of staff, <u>a resource available to me which answers a lot of the questions that I have about using interpreters in my practice and how that might work.</u> So I found that very helpful.                                                                                | Coded text to <b>Coherence (Internalisation)</b> – sees benefit in this initiative.<br>Underlined text double coded to <b>Coherence (Differentiation)</b> as this seems to be a new way of working.                      |
| Facilitator                    | So that's a real positive for you about this particular training initiative. Okay and who else has comments here that they'd like to read out to us and remind us about? There's quite a few here.                                                                                                                                                                                                              |                                                                                                                                                                                                                          |

|    |                               |                                                                                                |                                             |
|----|-------------------------------|------------------------------------------------------------------------------------------------|---------------------------------------------|
| 1  |                               |                                                                                                |                                             |
| 2  |                               |                                                                                                |                                             |
| 3  |                               |                                                                                                |                                             |
| 4  |                               |                                                                                                |                                             |
| 5  | Interpreter*                  | Yeah I think that one there [name] that you pointed to is my one and as an interpreter         | Text coded to Coherence –                   |
| 6  |                               | I felt that this package was particularly relevant because it gives special attention to       | understands initiative and sees             |
| 7  |                               | the Irish context and I feel that that's very important for me in my role as an                | benefit of it.                              |
| 8  |                               | interpreter. <u>And that you know for interpreters working in Ireland that its just very</u>   | Underlined text double coded to             |
| 9  |                               | <u>useful, I don't think this has been done before.</u>                                        | <b>Coherence (Differentiation)</b> as this  |
| 10 |                               |                                                                                                | seems to be a new way of working.           |
| 11 |                               |                                                                                                |                                             |
| 12 |                               |                                                                                                |                                             |
| 13 |                               |                                                                                                |                                             |
| 14 | <b>Coding from Dutch Team</b> |                                                                                                |                                             |
| 15 | Facilitator                   | So when we began this, this morning [name] as the policy person you made a very                |                                             |
| 16 |                               | interesting comment and you started the whole ball rolling with this didn't you?               |                                             |
| 17 |                               |                                                                                                |                                             |
| 18 | Policy maker*                 | Yeah, I suppose just reflecting on where we are at, at the moment within the health            | Text coded to <b>Coherence</b> .            |
| 19 |                               | organisation is that we have a ban on travel and there's an embargo on education and           | Underlined text double coded to             |
| 20 |                               | training initiatives.                                                                          | <b>Cognitive Participation</b> , as need to |
| 21 |                               | So something like this that provides a DVD, training and guidance is a major plus. <u>It's</u> | engage frontline staff.                     |
| 22 |                               | <u>something that's really going to tick the boxes for us whilst be very meaningful for</u>    |                                             |
| 23 |                               | <u>front line staff as well</u>                                                                |                                             |
| 24 |                               |                                                                                                |                                             |
| 25 | Facilitator                   | Okay so it's got two real advantages there, it's going to get over the problem you have        |                                             |
| 26 |                               | about not being able to travel, not being able to go out and do the capacity building          |                                             |
| 27 |                               | and training because it hands it to you right on the plate, as you see it. And also it's       |                                             |
| 28 |                               | going to be very meaningful for front line staff, and if I remember [name] you found           |                                             |
| 29 |                               | that interesting. You had a comment about that...                                              |                                             |
| 30 |                               |                                                                                                |                                             |
| 31 | GP*                           | Yeah I think this was mine here, so as a GP I really liked the fact that there was a           | Text coded to <b>Cognitive</b>              |
| 32 |                               | resource available to me as a front line member of staff, a resource available to me           | <b>Participation</b> as this was            |
| 33 |                               | which answers a lot of the questions that I have about using interpreters in my                | interpreted by Dutch team as                |
| 34 |                               | practice and how that might work. So I found that very helpful.                                | focusing on the individual's                |
| 35 |                               |                                                                                                | willingness to engage with                  |
| 36 |                               |                                                                                                | interpreters.                               |
| 37 |                               |                                                                                                |                                             |
| 38 | Facilitator                   | So that's a real positive for you about this particular training initiative. Okay and who      |                                             |
| 39 |                               | else has comments here that they'd like to read out to us and remind us about?                 |                                             |
| 40 |                               | There's quite a few here.                                                                      |                                             |
| 41 |                               |                                                                                                |                                             |
| 42 |                               |                                                                                                |                                             |
| 43 |                               |                                                                                                |                                             |
| 44 |                               |                                                                                                |                                             |
| 45 |                               |                                                                                                |                                             |
| 46 |                               |                                                                                                |                                             |
| 47 |                               |                                                                                                |                                             |
| 48 |                               |                                                                                                |                                             |
| 49 |                               |                                                                                                |                                             |

1  
2  
3  
4  
5  
6  
7  
8  
9  
10  
11  
12  
13  
14  
15  
16  
17  
18  
19  
20  
21  
22  
23  
24  
25  
26  
27  
28  
29  
30  
31  
32  
33  
34  
35  
36  
37  
38  
39  
40  
41  
42  
43  
44  
45  
46  
47  
48  
49

Interpreter\*

Yeah I think that one there [name] that you pointed to is my one and as an interpreter I felt that this package was particularly relevant because it gives special attention to the Irish context and I feel that that's very important for me in my role as an interpreter. And that you know for interpreters working in Ireland that its just very useful, I don't think this has been done before.

First part coded to **Coherence** – focused on understanding and a new way of working.  
Underlined text double coded to **Cognitive Participation** – focused on buy-in and engagement with interpreters.

**Final coding after face-to-face discussion**

Facilitator

So when we began this, this morning [name] as the policy person you made a very interesting comment and you started the whole ball rolling with this didn't you?

Policy maker\*

Yeah, I suppose just reflecting on where we are at, at the moment within the health organisation is that we have a ban on travel and there's an embargo on education and training initiatives.

Text coded to **Coherence** – trying to make sense of the training initiative; what makes it a new way or working.

So something like this that provides a DVD, training and guidance is a major plus. It's something that's really going to tick the boxes for us whilst be very meaningful for front line staff as well

Text coded to **Collective Action (Contextual Integration)** – refers to what is involved and the resources provided (DVD, training and guidance).

Underlined text double coded to **cognitive participation** – consideration of other groups that need to be engaged with

Facilitator

Okay so it's got two real advantages there, it's going to get over the problem you have about not being able to travel, not being able to go out and do the capacity building and training because it hands it to you right on the plate, as you see it. And also it's going to be very meaningful for front line staff, and if I remember [name] you found that interesting. You had a comment about that...

GP\*

Yeah I think this was mine here, so as a GP I really liked the fact that there was a resource available to me as a front line member of staff, a resource available to me

Text coded to **Coherence** – reflects that this is a new way of working

1  
2  
3  
4  
5  
6  
7  
8  
9  
10  
11  
12  
13  
14  
15  
16  
17  
18  
19  
20  
21  
22  
23  
24  
25  
26  
27  
28  
29  
30  
31  
32  
33  
34  
35  
36  
37  
38  
39  
40  
41  
42  
43  
44  
45  
46  
47  
48  
49

which answers a lot of the questions that I have about using interpreters in my practice and how that might work. So I found that very helpful.

**(Differentiation)**; recognises the benefits **(Internalisation)**.

Facilitator

So that's a real positive for you about this particular training initiative. Okay and who else has comments here that they'd like to read out to us and remind us about? There's quite a few here.

Interpreter\*

Yeah I think that one there [name] that you pointed to is my one and as an interpreter I felt that this package was particularly relevant because it gives special attention to the Irish context and I feel that that's very important for me in my role as an interpreter. And that you know for interpreters working in Ireland that its just very useful, I don't think this has been done before.

Text coded to **Coherence (Differentiation)** – seen as a new way of working.

Text underlined double coded to **Collective Action (Contextual Integration)** – this refers to Irish context.

---

## Challenges

On-going telephone and email contact ensured that difficulties and tensions were quickly surfaced, particularly when theory was being applied to fieldwork. Training at month 20 began with an intensive de-briefing, where in-country teams were encouraged to freely discuss their concerns and challenges arising from using NPT. These focused on two, related, concerns. There was a continued lack of confidence in their knowledge of NPT itself and of being able to correctly map issues and data generated in the field to the NPT constructs. However, the use of visual methods of collecting and displaying data generated during the interactive group exercises, as exemplified in PLA approaches,<sup>31</sup> meant that the trainers could quickly identify a high degree of fidelity in the assignment of data to NPT constructs, thus reassuring the team of their knowledge development (Figure 4).

INSERT FIGURE 4 HERE

The second major issue reflected the disciplinary and epistemological differences within the research team. Some researchers were used to policy-related research, where the application of a theoretical framework to data and the use of approaches such as Framework Analysis<sup>49</sup> were familiar. Others came from a sociological or anthropological background and were more comfortable with an inductive data-driven approach to analysis. This led to understandable concerns that data might be 'flattened' and shoe-horned into the NPT framework. To alleviate this concern, the trainers paid particular attention to the identification and recognition of coding which lay outside the NPT constructs, for example in relation to power dynamics between different stakeholders. A final concern was whether construct application and data generation, in the field, was linear or whether there were 'feedback loops'. For example, the research team considered the question of whether engaging in the work of implementing a G/TI could increase participants understanding or 'coherence' in relation to that G/TI. Training, therefore, continuously emphasised the lack of linearity in the process of applying theory to both data collection and analysis and encouraged the researchers to think through how this would affect data collection in the field.

## Discussion

### *Principal findings and their relation to other work*

We have described our approach to applying a mid-level sociological theory – Normalisation Process Theory – to a multi-site cross-country research study, RESTORE. In our endeavour to use NPT to shape our overall implementation journey, including data collection as well as analysis, we had to develop iterative and flexible training to support our multi-disciplinary, cross-national project team. While this presented challenges, we believe it also strengthened and added value to our work, ensuring it was designed, implemented and analysed in a robust and consistent manner across all five countries in which empirical data collection was conducted.

A multi-disciplinary, multi-national team inevitably has differences in terms of understanding the process of qualitative research and the use of theory. Professional and cultural perspectives impact on both individual and collective comfort (both in terms of country and professional discipline) with the concept of using theory to inform the design and conduct of a largely qualitative, implementation study. For example, researchers used to a more inductive approach to data analysis were initially cautious of an approach that applied a theoretical framework to data analysis. The design of a robust programme of training, which acknowledged and discussed these perspectives during the course of the training, was challenging but also allowed the team to reach a shared understanding of what the study was trying to achieve. The benefits of surfacing these tensions became apparent as the training moved to the process of data analysis.

From our experience of developing training for using NPT, we have developed a series of generic recommendations that can be applied to other studies seeking to use theoretical frameworks in health services research (Table 3).

**Table 3. Recommendations for the future development of training to support the use of theory in health services research**

|                                                                                                                                               |
|-----------------------------------------------------------------------------------------------------------------------------------------------|
| 1. The application of theory to study design and fieldwork is not linear and training must acknowledge this                                   |
| 2. Experiential learning and the use of interactive, participatory and visual approaches are an important learning device.                    |
| 3. Training can be most effective when it focuses on the high level constructs of a theory.                                                   |
| 4. Different disciplinary backgrounds must be acknowledged and welcomed.                                                                      |
| 5. Space is required in the training programme to acknowledge and address researcher concerns.                                                |
| 6. Training in the application of theory can support the development and robustness of qualitative coding, especially for multi-site studies. |

A key recommendation is to acknowledge, from the beginning of training, that theory is not linear or sequential. This is often a challenge when applying theoretical frameworks to fieldwork; for example, Michie and colleagues have developed their Behaviour Change model as a wheel, in order to address any pre-conceived conceptions of 'linearity'.<sup>50</sup> The model of candidacy has also been criticised for an apparent linearity that is not found when applied in the field.<sup>51 52</sup> The nature and speed of fieldwork means it is important for researchers to be familiar with all constructs of a selected theory, in order to fully appreciate the theoretical relevance of the data as it is generated. Thus, training needs to both acknowledge and affirm the complexities of temporal order in prospective fieldwork and ensure that researchers are familiar with all the components of a theoretical framework early enough in the research study to ensure confidence when moving into fieldwork.

Team learning and understanding develops more rapidly and deeply by using participatory and experiential approaches to learning.<sup>31</sup> In our work, interactive exercises with visual methods of collecting data, role play and non-specific 'light' examples were all effective approaches to supporting learning and understanding. We strongly recommend this approach in the development of training for any complex theory that requires new users to develop an understanding of a range of

1  
2  
3 components. The second advantage of using multiple interactive exercises is as a means to check on  
4  
5 research team's 'theoretical fidelity' when analysing the data generated in the field.  
6

7  
8 Theoretical frameworks are often complex, with constructs which can themselves be broken down  
9  
10 to ever smaller sub-constructs. This level of complexity can be daunting for researchers new to the  
11  
12 theory being used and can lead to difficulties when coding data. Our experience suggests that a  
13  
14 focus on the high level constructs of a theory works best in the early stages of training. Once teams  
15  
16 have grasped and understood those, they can intuitively develop a deeper understanding of the  
17  
18 underlying sub-components.  
19

20  
21 Throughout our training programme, we allowed ample time for concerns to be raised and discussed  
22  
23 and for the team to develop solutions. An advantage of the time spent of training was apparent,  
24  
25 however, later in the project as we moved onto coding the qualitative data generated across  
26  
27 multiple sites. By then, the time spent in early training ensured that the team had a much clearer  
28  
29 and consistent view of the constructs and their meaning, leading to a consistency and robustness in  
30  
31 coding and analysis.  
32  
33

### 34 35 36 37 **Conclusion**

38  
39 Overall, we found the prospective application of NPT to our work to be invaluable but, at times,  
40  
41 challenging. We believe that these issues were not unique to the use of NPT, but could arise with the  
42  
43 use of other theoretical frameworks, especially in large multi-site and cross-country projects. The  
44  
45 development of a complementary package of training to support the use of our chosen theory  
46  
47 ensured that our work was consistently and robustly informed by theory at all stages of the project,  
48  
49 from design through data collection to analysis. This approach can, and should, be adopted by future  
50  
51 research teams carrying out theoretically-informed implementation studies.  
52  
53  
54  
55  
56  
57  
58  
59  
60



### Competing interests

The authors declare that there are no competing interests.

### Authors contributions

All authors (COD, FM, CD, MO'RdeB, TdeB, NB, CL, AS, MP, MvdM, EvWB, KG, LC, CP, ET, FvdDM, MV, WS, AMcF) made substantial contributions to the design and development of RESTORE and its training programme, to the collection of data or to the analysis and interpretation of the data. Training materials were developed by COD, FM, CD and AMcF, with input from MO'RdeB and TdeB. COD wrote the first draft of the paper and led substantive re-drafting, supported by FM, CD and AMcF; all authors listed above were involved in revising and commenting on later drafts of the manuscript. All authors have given their final approval to this version.

### Acknowledgements

Some of this work was presented at a workshop at the North American Primary Care Research Group Meeting in November 2014 and we thank the participants for their helpful comments; we also thank Professor Carl May, University of Southampton for his support and helpful discussions.

### Consent to use data

Ethical approval to use data generated during training was obtained from the National University of Ireland, Galway. All members of the RESTORE team agreed to their evaluation comments being used in this paper.

**Funding**

RESTORE was funded by the European Union's FP7 Health Programme, contract number 257258.

The funder has not contributed to the views expressed in this paper.

**Data Sharing**

No additional data available. Training materials are available as described in the Supplementary Files.

For peer review only

## References

1. Woolf SH. The meaning of translational research and why it matters. *JAMA* 2008;299(2):211-13.
2. Pronovost PJ, Goeschel CA. Time to take health delivery research seriously. *JAMA* 2011;306(3):310-11.
3. Eccles MP, Armstrong D, Baker R, et al. An implementation research agenda. *Implementation Science* 2009;4(1):18.
4. Greenhalgh T, Robert G, Macfarlane F, et al. Diffusion of innovations in service organizations: Systematic review and recommendations. *Milbank Quarterly* 2004;82(4):581-629.
5. The Improved Clinical Effectiveness through Behavioural Research Group (ICEBeRG). Designing theoretically-informed implementation interventions. *Implementation Science* 2006;1(1):4.
6. Davidoff F, Dixon-Woods M, Leviton L, et al. Demystifying theory and its use in improvement. *BMJ Quality & Safety* 2015 doi: 10.1136/bmjqs-2014-003627
7. Sales A, Smith J, Curran G, et al. Models, strategies, and tools. Theory in implementing evidence-based findings into health care practice. *Journal of General Internal Medicine* 2006;21(2):S43-S49. doi: 10.1007/s11606-006-0274-x
8. Forster D, Newton M, McLachlan H, et al. Exploring implementation and sustainability of models of care: can theory help? *BMC Public Health* 2011;11(Suppl 5):S8.
9. Craig P, Dieppe P, Macintyre S, et al. Developing and evaluating complex interventions: The new Medical Research Council guidance. *International Journal of Nursing Studies* 2013;50(5):587-92.
10. Davies P, Walker A, Grimshaw J. A systematic review of the use of theory in the design of guideline dissemination and implementation strategies and interpretation of the results of rigorous evaluations. *Implementation Science* 2010;5(1):14.
11. Colquhoun HL, Brehaut JC, Sales A, et al. A systematic review of the use of theory in randomized controlled trials of audit and feedback. *Implementation Science* 2013;8(1):66.
12. McDonald KM, Graham ID, Grimshaw J. Toward a theoretic basis for quality improvement interventions. In: Shojania KG, McDonald KM, Wachter RM, et al., eds. Closing the quality gap: A critical analysis of quality improvement strategies Rockville, MD: Agency for Healthcare Research and Quality 2004:27-40.
13. Nilsen P. Making sense of implementation theories, models and frameworks. *Implementation Science* 2015;10(1):53.

- 1  
2  
3 14. Weiss CH. Nothing as practical as a good theory: Exploring theory-based evaluation for  
4 comprehensive community-based initiatives for children and families. In: Connell JP, Kubisch AC,  
5 Schorr LB, et al., eds. *New approaches to evaluating community initiatives, Vol 1 Concepts, methods*  
6 *and contexts*. Washington DC: Aspen Institute 1995.
- 7  
8  
9  
10 15. Tabak RG, Khoong EC, Chambers DA, et al. Bridging research and practice: Models for  
11 dissemination and implementation research. *American Journal of Preventive Medicine*  
12 2012;43(3):337-50.
- 13  
14  
15 16. Grol RPTM, Bosch MC, Hulscher MEJL, et al. Planning and studying improvement in patient care:  
16 The use of theoretical perspectives. *The Milbank Quarterly* 2007;85(1):93-138.
- 17  
18  
19 17. Wyke S, Adamson J, Dixon D, et al. Consultation and illness behaviour in response to symptoms:  
20 A comparison of models from different disciplinary frameworks and suggestions for future research  
21 directions. *Social Science & Medicine* 2013;86(0):79-87.
- 22  
23  
24 18. Ullrich PM, Sahay A, Stetler CB. Use of implementation theory: A focus on PARIHS. *Worldviews*  
25 *on Evidence-Based Nursing* 2014;11(1):26-34. doi: 10.1111/wvn.12016
- 26  
27  
28 19. Glasgow RE, Vogt TM, Boles SM. Evaluating the public health impact of health promotion  
29 interventions: the RE-AIM framework. *Am J Public Health* 1999;89(9):1322-27.
- 30  
31  
32 20. Gaglio B, Shoup JA, Glasgow RE. The RE-AIM framework: A systematic review of use over time.  
33 *American Journal of Public Health* 2013;103(6):e38-e46. doi: 10.2105/AJPH.2013.301299
- 34  
35  
36 21. Kitson AL, Rycroft-Malone J, Harvey G, et al. Evaluating the successful implementation of  
37 evidence into practice using the PARIHS framework: theoretical and practical challenges.  
38 *Implementation Science* 2008;3(1):1.
- 39  
40  
41 22. Helfrich CD, Damschroder LJ, Hagedorn HJ, et al. A critical synthesis of literature on the  
42 promoting action on research implementation in health services (PARIHS) framework.  
43 *Implementation Science* 2010;5(1):82. doi: 10.1186/1748-5908-5-82
- 44  
45  
46 23. Field B, Booth A, Iltott I, et al. Using the Knowledge to Action Framework in practice: a citation  
47 analysis and systematic review. *Implementation Science* 2014;9(1):172.
- 48  
49  
50 24. McEvoy R, Ballini L, Maltoni S, et al. A qualitative systematic review of studies using the  
51 normalization process theory to research implementation processes. *Implementation Science*  
52 2014;9(1):2.
- 53  
54  
55 25. Crosby R, Noar SM. Theory development in health promotion: are we there yet? *J Behav Med*  
56 2010;33(4):259-63. doi: 10.1007/s10865-010-9260-1
- 57  
58  
59  
60

- 1  
2  
3 26. Benzer J, Beehler S, Cramer I, et al. Between and within-site variation in qualitative  
4 implementation research. *Implementation Science* 2013;8(1):4. doi: 10.1186/1748-5908-8-4  
5  
6  
7 27. MacFarlane A, O'Donnell C, Mair F, et al. REsearch into implementation STRategies to support  
8 patients of different ORigins and language background in a variety of European primary care settings  
9 (RESTORE): study protocol. *Implementation Science* 2012;7:111.  
10  
11  
12 28. MacFarlane A, O'Reilly-de Brún M, de Brún T, et al. Healthcare for migrants, participatory health  
13 research and implementation science—better health policy and practice through inclusion. The  
14 RESTORE project. *European Journal of General Practice* 2014:1-5. doi:  
15 10.3109/13814788.2013.868432  
16  
17  
18 29. O'Donnell CA, Burns N, Mair FS, et al. Reducing the health care burden for marginalised migrants:  
19 The potential role for primary care in Europe. *Health Policy* 2016 doi:  
20 10.1016/j.healthpol.2016.03.012  
21  
22  
23 30. O'Reilly-de Brún M, MacFarlane A, de Brún T, et al. Involving migrants in the development of  
24 guidelines for communication in cross-cultural general practice consultations: a participatory  
25 learning and action research project. *BMJ Open* 2015;5(9) doi: 10.1136/bmjopen-2014-007092  
26  
27  
28 31. de Brún T, O'Reilly-de Brún M, O'Donnell CA, et al. Learning from doing: the case for combining  
29 normalisation process theory and participatory learning and action research methodology for  
30 primary healthcare implementation research. *BMC Health Services Research* 2016;16:346. doi:  
31 10.1186/s12913-016-1587-z  
32  
33  
34 32. May C, Finch T. Implementing, embedding, and integrating practices: An outline of Normalization  
35 Process Theory. *Sociology* 2009;43(3):535-54.  
36  
37  
38 33. May CR, Mair F, Finch T, et al. Development of a theory of implementation and integration:  
39 Normalization Process Theory. *Implementation Science* 2009;4(1):29.  
40  
41  
42 34. Bamford C, Heaven B, May C, et al. Implementing nutrition guidelines for older people in  
43 residential care homes: a qualitative study using Normalization Process Theory. *Implementation  
44 Science* 2012;7(1):106.  
45  
46  
47 35. May CR, Sibley A, Hunt K. The nursing work of hospital-based clinical practice guideline  
48 implementation: An explanatory systematic review using Normalisation Process Theory.  
49 *International Journal of Nursing Studies* 2014;51(2):289-99.  
50  
51  
52 36. Gallacher K, May CR, Montori VM, et al. Understanding patients' experiences of treatment  
53 burden in chronic heart failure using Normalization Process Theory. *Annals of Family Medicine*  
54 2011;9(3):235-43.  
55  
56  
57  
58  
59  
60

- 1  
2  
3 37. Gallacher K, Morrison D, Jani B, et al. Uncovering treatment burden as a key concept for stroke  
4 care: A systematic review of qualitative research. *PLoS Med* 2013;10(6):e1001473. doi:  
5 doi:10.1371/journal.pmed.1001473  
6  
7  
8 38. Jani B, Blane D, Browne S, et al. Identifying treatment burden as an important concept for end of  
9 life care in those with advanced heart failure. *Current Opinion in Supportive Palliative Care*  
10 2013;7(1):3-7. doi: doi:"10.1097/SPC.0b013e32835c071f  
11  
12  
13 39. Murray E, Treweek S, Pope C, et al. Normalisation process theory: a framework for developing,  
14 evaluating and implementing complex interventions. *BMC Medicine* 2010;8(1):63.  
15  
16  
17 40. de Brún T, O'Reilly de-Brún M, van Weel-Baumgarten E, et al. Guidelines and training initiatives  
18 that support communication in cross-cultural primary-care settings: appraising their  
19 implementability using Normalization Process Theory. *Family Practice* 2015;32(4):420-25. doi:  
20 10.1093/fampra/cmV022  
21  
22  
23 41. Lionis C, Papadakaki M, Saridaki A, et al. Engaging migrants and other stakeholders to improve  
24 communication in cross-cultural consultation in primary care: a theoretically informed participatory  
25 study. *BMJ Open* 2016;6:e010822. doi: 10.1136/bmjopen-2015-010822  
26  
27  
28 42. May C, Finch T, Mair F, et al. Understanding the implementation of complex interventions in  
29 health care: the normalization process model. *BMC Health Services Research* 2007;7:148.  
30  
31  
32 43. May C, Mair F, Dowrick C, et al. Process evaluation for complex interventions in primary care:  
33 understanding trials using the normalization process model. *BMC Family Practice* 2007;8(1):42.  
34  
35  
36 44. May CR. Assessing and evaluating complex interventions for chronic disease management: The  
37 nomalization process model, 2006.  
38  
39  
40 45. Gunn JM, Palmer VJ, Dowrick CF, et al. Embedding effective depression care: using theory for  
41 primary care organisational and systems change. . *Implementation Science* 2010;5:62.  
42  
43  
44 46. McEvoy R, MacFarlane A. Community participation in primary care in Ireland: the need for  
45 implementation research. *Primary Health Care Research & Development* 2013;14(2):126-39.  
46  
47  
48 47. Devlin AM, McGee-Lennon M, O'Donnell CA, et al. Delivering digital health and well-being at  
49 scale: Lessons learned during the implementation of the dallas program in the United Kingdom.  
50 *Journal of the American Medical Informatics Association* 2016;23:48-59. doi: 10.1093/jamia/ocv097  
51  
52  
53 48. Teunissen E, Gravenhorst K, Dowrick C, et al. Interpreting guidelines and training initiatives to  
54 improve cross-cultural communication in primary care consultations: A qualitative participatory  
55 European study. *International Journal for Equity in Health* 2017  
56  
57  
58  
59  
60

- 1  
2  
3 49. Ritchie J, Spencer L. Qualitative data analysis for applied policy research. In: Bryman A, Burgess  
4 RG, eds. *Analyzing qualitative data*. London: Routledge 1994:173-94.  
5  
6  
7 50. Michie S, van Stralen MM, West R. The behaviour change wheel: A new method for  
8 characterising and designing behaviour change interventions. *Implementation Science* 2011;6(1):42.  
9  
10 51. Mackenzie M, Conway E, Hastings A, et al. Is "candidacy" a useful concept for understanding  
11 journeys through public services? A critical interpretive literature synthesis. *Social Policy &*  
12 *Administration* 2013;47(7):806-25. doi: 10.1111/j.1467-9515.2012.00864.x  
13  
14 52. Mackenzie M, Conway E, Hastings A, et al. Intersections and multiple 'candidacies': Exploring  
15 connections between two theoretical perspectives on domestic abuse and their implications for  
16 practicing policy. *Social Policy and Society* 2015;14(01):43-62. doi: doi:10.1017/S1474746414000244  
17  
18  
19  
20  
21  
22  
23  
24  
25  
26  
27  
28  
29  
30  
31  
32  
33  
34  
35  
36  
37  
38  
39  
40  
41  
42  
43  
44  
45  
46  
47  
48  
49  
50  
51  
52  
53  
54  
55  
56  
57  
58  
59  
60

1  
2  
3 **Figure 1. The three stages of RESTORE**  
4

5 **Figure 2. Stages of NPT training and alignment with RESTORE fieldwork**  
6

7 **Figure 3. NPT “light” training material**  
8

9 **Figure 4. Example of a visual data mapping exercise**  
10  
11  
12  
13  
14  
15  
16  
17  
18  
19  
20  
21  
22  
23  
24  
25  
26  
27  
28  
29  
30  
31  
32  
33  
34  
35  
36  
37  
38  
39  
40  
41  
42  
43  
44  
45  
46  
47  
48  
49  
50  
51  
52  
53  
54  
55  
56  
57  
58  
59  
60

For peer review only



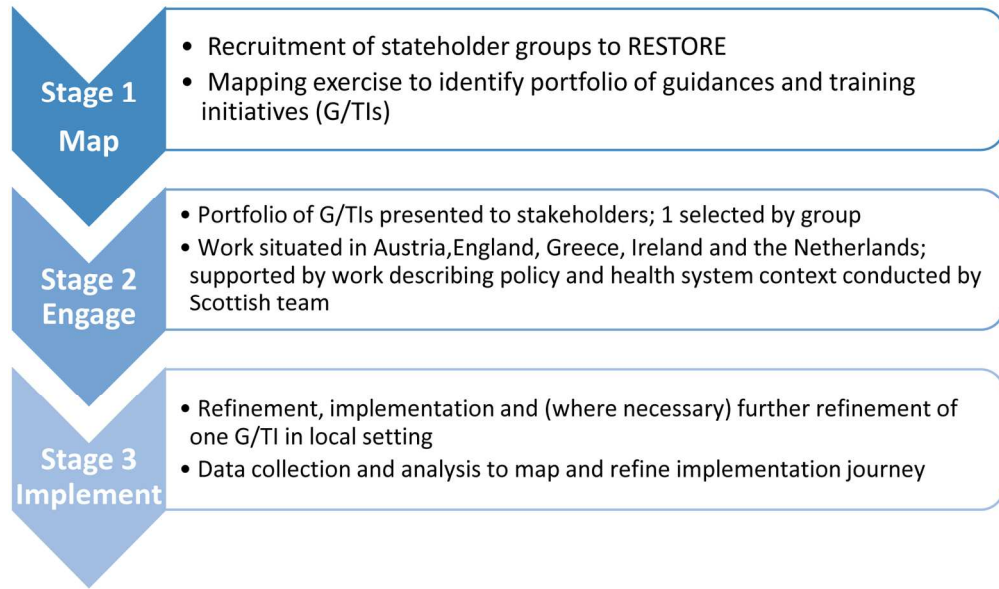

Figure 1. The three stages of RESTORE

154x91mm (300 x 300 DPI)

Review only

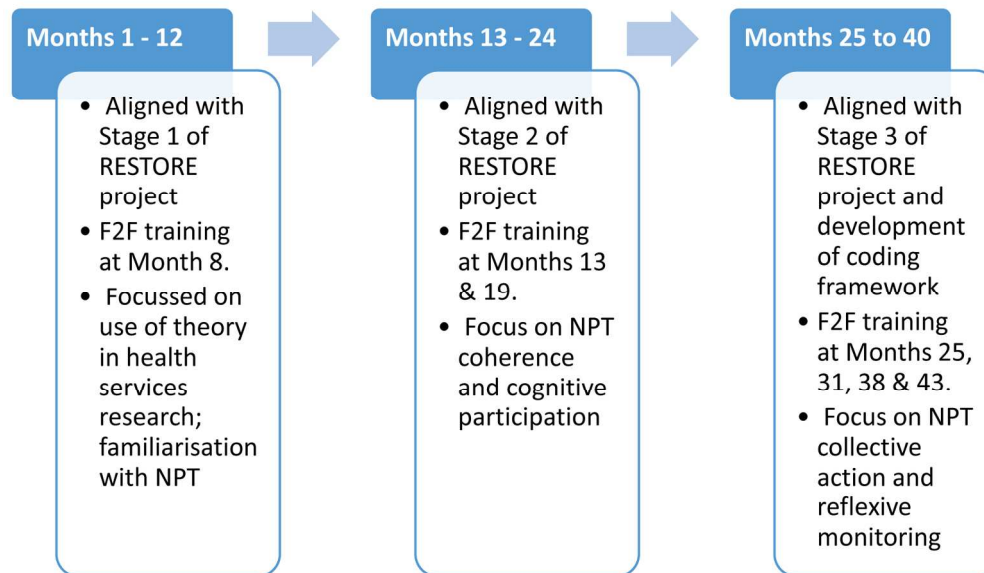

Figure 2. Stages of NPT training and alignment with RESTORE fieldwork

154x90mm (300 x 300 DPI)

1  
2  
3  
4  
5  
6  
7  
8 **Question: Do we think a circus tent can become a normalised venue for accommodation**  
9 **for our next RESTORE team meeting?**

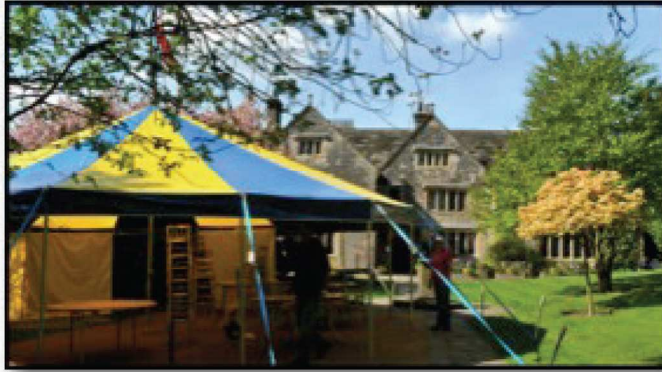

25 In addressing this question, consider the following NPT sensitising questions:

26  
27 Does this make sense to the team as a whole and to individuals within the team?  
28 (Coherence)

29 What work needs to be done to get everyone in the team to engage with the idea?  
30 (Cognitive participation)

31 Who needs to do what to put this into action? What resources do we need? (Collective  
32 action)

33 How will we know if it worked in practice? (Reflexive monitoring)  
34  
35

36  
37 Figure 3. NPT "light" training material

38 149x132mm (300 x 300 DPI)  
39  
40  
41  
42  
43  
44  
45  
46  
47  
48  
49  
50  
51  
52  
53  
54  
55  
56  
57  
58  
59  
60

only

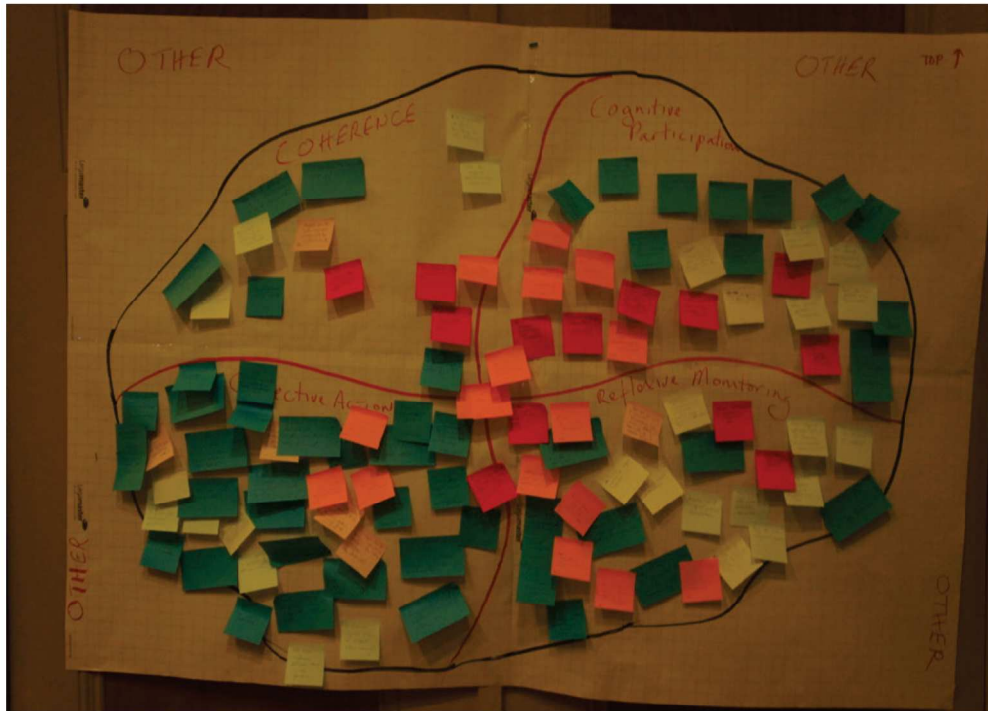

Each “sticky” notelet corresponds to an item of verbal data identified from the interactive role play discussion

Figure 4. Example of a visual data mapping exercise

160x129mm (300 x 300 DPI)

## Supplementary File 1. RESTORE team backgrounds and NPT experience

| Country           | Professional background                                                | Experience of NPT                                                   | Country            | Professional background        | Experience of NPT                                                                                  |
|-------------------|------------------------------------------------------------------------|---------------------------------------------------------------------|--------------------|--------------------------------|----------------------------------------------------------------------------------------------------|
| <b>Austria</b>    |                                                                        |                                                                     | <b>Ireland</b>     |                                |                                                                                                    |
| RESTORE Applicant | Academic general practitioner                                          | New to NPT                                                          | RESTORE Applicant  | Social scientist               | Experienced in use of NPT; part of original group who developed NPT; using NPT in several projects |
| Researcher        | Social scientist                                                       | New to NPT                                                          | Researcher         | Social/cultural anthropologist | Familiar with NPM; New to NPT                                                                      |
|                   |                                                                        |                                                                     | Researcher         | Social/cultural anthropologist | New to NPT                                                                                         |
| <b>England</b>    |                                                                        |                                                                     | <b>Netherlands</b> |                                |                                                                                                    |
| RESTORE Applicant | Academic general practitioner                                          | Experienced in use of NPT; part of original group who developed NPT | RESTORE Applicant  | Academic general practitioner  | New to NPT                                                                                         |
| Researcher        | Social anthropologist                                                  | New to NPT                                                          | RESTORE Applicant  | Academic general practitioner  | New to NPT                                                                                         |
| Researcher        | Social scientist                                                       | New to NPT                                                          | Researcher         | Academic general practitioner  | New to NPT                                                                                         |
|                   |                                                                        |                                                                     | Researcher         | Social/cultural anthropologist | New to NPT                                                                                         |
| <b>Greece</b>     |                                                                        |                                                                     | <b>Scotland</b>    |                                |                                                                                                    |
| RESTORE Applicant | Academic general practitioner; Primary health care services researcher | New to NPT                                                          | RESTORE Applicant  | Health services research       | Experienced in use of NPT; part of NIHR NPT user group; using NPT in several projects              |
| Researcher        | Public health researcher                                               | New to NPT                                                          | RESTORE Applicant  | Academic general practitioner  | Experienced in use of NPT; part of original group who developed NPT; using NPT in                  |

1  
2  
3  
4  
5  
6  
7  
8  
9  
10  
11  
12  
13  
14  
15  
16  
17  
18  
19  
20  
21  
22  
23  
24  
25  
26  
27  
28  
29  
30  
31  
32  
33  
34  
35  
36  
37  
38  
39  
40  
41  
42  
43  
44  
45  
46  
47

|            |                         |            |            |             |                                |
|------------|-------------------------|------------|------------|-------------|--------------------------------|
| Researcher | Lecturer in social work | New to NPT | Researcher | Sociologist | several projects<br>New to NPT |
|------------|-------------------------|------------|------------|-------------|--------------------------------|

---

For peer review only

## Supplementary File 2. NPT training programme

| Training                                         | Session & Duration                 | Content                                                                                                                                                                                                                                                                                                                                                |
|--------------------------------------------------|------------------------------------|--------------------------------------------------------------------------------------------------------------------------------------------------------------------------------------------------------------------------------------------------------------------------------------------------------------------------------------------------------|
| <b>Early project training (Months 1 to 12)</b>   |                                    |                                                                                                                                                                                                                                                                                                                                                        |
| Month 8<br>November<br>2011                      | Training Session 1.<br>(2.5 hours) | <b>Introduction to NPT.</b><br>Development of NPT from ehealth research.<br><br>Overview of NPT and its four main constructs.                                                                                                                                                                                                                          |
|                                                  | Training Session 2.<br>(4.5 hours) | <b>Using NPT in RESTORE.</b><br>Example of using NPT in a qualitative study on use of interpreters in primary care.<br><br>Using NPT in RESTORE – focus on constructs of coherence and cognitive participation<br><br>Participatory Exercise 1: Team asked to think about the issues arising from implementation of paid interpreters in primary care. |
| <b>Mid-project training (Months 13 to 24)</b>    |                                    |                                                                                                                                                                                                                                                                                                                                                        |
| Month 13<br>April 2012                           | Training Session 3.<br>(2.0 hours) | <b>Using NPT in RESTORE.</b><br>Focus of NPT constructs coherence and cognitive participation.<br><br>Participatory Exercise 2: NPT “light” non-RESTORE exercise                                                                                                                                                                                       |
|                                                  | Training Session 4.<br>(2.0 hours) | Focus of NPT constructs coherence and cognitive participation.<br><br>Participatory Exercise 3: NPT RESTORE exercise                                                                                                                                                                                                                                   |
| Month 20<br>November<br>2012                     | Training Session 5<br>(2.0 hours)  | <b>Addressing anxieties.</b><br>Roundtable discussion of arising concerns.<br>Review of why NPT being used and its role in the project.                                                                                                                                                                                                                |
|                                                  | Training Session 6<br>(2.0 hours)  | <b>Using NPT in RESTORE.</b><br>Participatory Exercise 4: NPT RESTORE exercise                                                                                                                                                                                                                                                                         |
| <b>Later training sessions (Months 25 to 48)</b> |                                    |                                                                                                                                                                                                                                                                                                                                                        |
| Month 25<br>April 2013                           | Training session 7<br>(2.5 hours)  | <b>Coding using NPT.</b><br>Preparatory work of coding data extract; face-to-face discussion of coding decisions at Consortium training.<br>Participatory Exercise 5: Discussion of coded extract of RESTORE data.                                                                                                                                     |
| Month 31<br>October 2013                         | Training session 8<br>(1.5 hours)  | <b>Addressing anxieties.</b><br>Roundtable discussion of progress with respect to using NPT                                                                                                                                                                                                                                                            |

|                          |                                     |                                                                                                                                                                                             |
|--------------------------|-------------------------------------|---------------------------------------------------------------------------------------------------------------------------------------------------------------------------------------------|
|                          |                                     | in fieldwork and in coding.                                                                                                                                                                 |
|                          | Training session 9<br>(3 hours)     | <b>Coding using NPT.</b><br>Team reviewed coding exercise conducted in-between face-to-face meetings; discussed Irish data transcript coded by AMacF; and discussed team coding “dilemmas”. |
| Month 38<br>May 2014     | Training session<br>10<br>(3 hours) | <b>Coding using NPT.</b><br>Focused on reviewing where each country team was in relation to NPT coding; connections between fieldwork and NPT; identifying and discussing coding dilemmas.  |
| Month 43<br>October 2014 | Training session<br>11              | Final discussion and clarification of coding framework.                                                                                                                                     |

---



---

**Supplementary File 3. Participatory exercises**

|    |                          |                                                                            |
|----|--------------------------|----------------------------------------------------------------------------|
| 1  |                          |                                                                            |
| 2  |                          |                                                                            |
| 3  |                          |                                                                            |
| 4  |                          |                                                                            |
| 5  |                          |                                                                            |
| 6  |                          |                                                                            |
| 7  |                          |                                                                            |
| 8  |                          |                                                                            |
| 9  | Month 8,                 | Consider the following scenario: Your health organisation is about to      |
| 10 | Participatory Exercise 1 | introduce paid interpreters into the primary care consultation. What       |
| 11 |                          | NPT-informed questions might you ask to assess how well this is            |
| 12 |                          | implemented into practice?                                                 |
| 13 |                          |                                                                            |
| 14 |                          | Participants were directed to the NPT toolkit, with its 16 questions, to   |
| 15 |                          | help them “think this through”                                             |
| 16 |                          |                                                                            |
| 17 | Month 13,                | NPT “light”: An exercise designed to get the research team thinking        |
| 18 | Participatory Exercise 2 | about coherence (understanding) and cognitive participation                |
| 19 |                          | (participation). Using interactive small group work, the team focussed on  |
| 20 |                          | an example entitle “Circus tent”. Teams were asked to consider if a circus |
| 21 |                          | tent could become normalised as team accommodation for future              |
| 22 |                          | Consortium meetings.                                                       |
| 23 |                          |                                                                            |
| 24 |                          | While the team debated this, the NPT trainers observed the questions,      |
| 25 |                          | took notes and assigned these to NPT categories. E.g.                      |
| 26 |                          |                                                                            |
| 27 |                          | Is this something new to me? (Coherence - Differentiation)                 |
| 28 |                          |                                                                            |
| 29 |                          | Do you think this will be helpful to the team? (Coherence –                |
| 30 |                          | Internalisation)                                                           |
| 31 |                          |                                                                            |
| 32 |                          | Will everyone agree that this is reasonable? (Cognitive participation -    |
| 33 |                          | Legitimation)                                                              |
| 34 |                          |                                                                            |
| 35 |                          | How many of the team buy into this idea? (Cognitive participation =        |
| 36 |                          | Enrolment)                                                                 |
| 37 | Month 13,                | NPT RESTORE exercise: Teams asked to consider the issues that might        |
| 38 | Participatory Exercise 3 | arise when implementing paid interpreters in primary care. Half of the     |
| 39 |                          | team were assigned roles (GP, nurse, interpreter, migrant patient) and     |
| 40 |                          | role-played a discussion about using interpreters; other half of team      |
| 41 |                          | watched, noting key questions and issues that arose, then assigned these   |
| 42 |                          | to NPT constructs.                                                         |
| 43 |                          |                                                                            |
| 44 |                          | N.B. The exercise was designed to focus on the constructs of coherence     |
| 45 |                          | and cognitive participation; however, teams also had to pay attention to   |
| 46 |                          | collective action and reflexive monitoring.                                |
| 47 |                          |                                                                            |
| 48 |                          |                                                                            |
| 49 | Month 20,                | NPT RESTORE exercise: Teams given the G/PI selected by the Irish team.     |
| 50 | Participatory Exercise 4 | Asked to role play as a practice team with roles assigned to address the   |
| 51 |                          | question “What levels and barriers will you encounter as you try to        |
| 52 |                          | implement this guidance in practice?”.                                     |
| 53 |                          |                                                                            |
| 54 |                          | Project members took turns at either role playing or noting NPT issue      |
| 55 |                          | and assigning them to constructs.                                          |
| 56 |                          |                                                                            |
| 57 | Month 25,                | NPT RESTORE exercise: Teams pre-circulated a short extract from a          |
| 58 | Participatory Exercise 5 | training DVD developed by the PLA trainers in which the Irish team role-   |
| 59 |                          | played a training session with stakeholders. Teams were asked to code      |
| 60 |                          | the qualitative extract to the main NPT construct. Three external          |
|    |                          | researchers expert in the use of NPT also asked to code the extract, as    |

---

1  
2  
3 well as RESTORE NPT training team. Coding collated and presented,  
4 paragraph by paragraph, to team at face-to-face meeting.  
5  
6

---

7  
8  
9  
10  
11  
12  
13  
14  
15  
16  
17  
18  
19  
20  
21  
22  
23  
24  
25  
26  
27  
28  
29  
30  
31  
32  
33  
34  
35  
36  
37  
38  
39  
40  
41  
42  
43  
44  
45  
46  
47  
48  
49  
50  
51  
52  
53  
54  
55  
56  
57  
58  
59  
60

For peer review only

**Supplementary File 4. Location of NPT presentations on Slideshare**

NPT Unpicked for the RESTORE project (<http://www.slideshare.net/KateODonnell6/npt-unpicked-for-restore-project-57742520>).

NPT training session 2 for RESTORE (<http://www.slideshare.net/KateODonnell6/npt-training-session-2-for-restore>)

NPT in RESTORE (<http://www.slideshare.net/KateODonnell6/npt-in-restore>)

NPT Coding exercise for RESTORE (<http://www.slideshare.net/KateODonnell6/npt-coding-exercise-for-restore-57743364>)

For peer review only

O'Donnell et al.

BMJOpen-2016-014289

Supporting the use of theory in cross-country health services research using Normalisation Process Theory as an example: A participatory qualitative approach

Reporting Checklist.

**Checklist used:** Tong A, Sainsbury P, Craig J. Consolidated criteria for reporting qualitative research (COREQ): a 32-item checklist for interviews and focus groups. *International Journal for Quality in Health Care* 2007;19(6):349-57. doi: 10.1093/intqhc/mzm042

| Criteria from Tong et al                                                           | As reported in O'Donnell et al                                                                                                                                                                                                                        |
|------------------------------------------------------------------------------------|-------------------------------------------------------------------------------------------------------------------------------------------------------------------------------------------------------------------------------------------------------|
| <b>Domain 1: Research team and reflexivity.</b>                                    |                                                                                                                                                                                                                                                       |
| Personal Characteristics                                                           |                                                                                                                                                                                                                                                       |
| 1. Interviewer/facilitator. Which author/s conducted the interview or focus group? | Training and qualitative evaluation of training led by Catherine O'Donnell and Anne MacFarlane, assisted by Christopher Dowrick, Frances Mair and Mary O'Reilly de Brun.                                                                              |
| 2. Credentials What were the researcher's credentials? E.g. PhD, MD.               | Catherine O'Donnell (COD): BSc (Hons), PhD, MPH.<br>Anne MacFarlane (AMcF): BA, MA, PhD.<br>Christopher Dowrick (CD): BA, MSc, MD, CQSW, FRCGP, FFPHM.<br>Frances Mair (FM): MBChB, MD, FRCGP, DRCOG.<br>Mary O'Reilly de Brun (MORdeB): BA.Th, M.Th. |
| 3. Occupation What was their occupation at the time of the study?                  | Catherine O'Donnell (COD): Professor of Primary Care Research & Development                                                                                                                                                                           |

|                                                                                                                                                                           |                                                                                                                                                                                                                                                                                                                                                                                                                                                                                                                                                                                                   |
|---------------------------------------------------------------------------------------------------------------------------------------------------------------------------|---------------------------------------------------------------------------------------------------------------------------------------------------------------------------------------------------------------------------------------------------------------------------------------------------------------------------------------------------------------------------------------------------------------------------------------------------------------------------------------------------------------------------------------------------------------------------------------------------|
|                                                                                                                                                                           | <p>Anne MacFarlane (AMcF): Professor of Primary Healthcare Research.</p> <p>Christopher Dowrick (CD): Professor of Primary Medical Care.</p> <p>Frances Mair (FM): Professor of Primary Care Research.</p> <p>Mary O'Reilly de Brun (MORdeB): Research Fellow.</p>                                                                                                                                                                                                                                                                                                                                |
| 4. Gender. Was the researcher male or female?                                                                                                                             | NPT training team consisted of four females; one male.                                                                                                                                                                                                                                                                                                                                                                                                                                                                                                                                            |
| 5. Experience and training. What experience or training did the researcher have?                                                                                          | <p>O'Donnell, MacFarlane, Mair, Dowrick are experienced, senior primary care academics. All four have led substantive programmes of research, using quantitative and qualitative methodologies, exploring a range of primary care issues. All have extensive experience of using NPT including applying NPT prospectively to complex interventions. These four team members thus formed the NPT trainers group, leading the development and delivery of the training reported here.</p> <p>Mary O'Reilly de Brun is an experienced researcher in the use of Participatory Learning in Action.</p> |
| <b>Relationship with participants</b>                                                                                                                                     | In answering these questions, I have regarded 'participants' as the members of the research team who were the focus of the training.                                                                                                                                                                                                                                                                                                                                                                                                                                                              |
| 6. Relationship established Was a relationship established prior to study commencement?                                                                                   | Throughout the project, there was a close working relationship across the entire team of 18 individuals. Regular meetings of the project team, coupled with the training described in this paper, resulted in a strong-knot groups with high levels of confidence in each other. This also engendered a powerful sense of community within the team, which crossed county location, disciplinary background, and level of seniority.                                                                                                                                                              |
| 7. Participant knowledge of the interviewer. What did the participants know about the researcher? e.g. personal goals, reasons for doing the research                     | The NPT trainers, who led on the evaluation, were part of the full RESTORE team. Thus the other members of the RESTORE research team knew NPT trainers well. The purpose of obtaining evaluation feedback was explained to the team and all consented to their feedback being used both to inform future training, and to being used in future publications.                                                                                                                                                                                                                                      |
| 8. Interviewer characteristics. What characteristics were reported about the interviewer/facilitator? e.g. Bias, assumptions, reasons and interests in the research topic | Reasons for collecting evaluation feedback from the research team was explained, and re-iterated, at each training session. The research team knew that the NPT trainers group (COD, AMacF, CD and FM) were interested in developing future training for use with other research groups.                                                                                                                                                                                                                                                                                                          |
| <b>Domain 2: study design</b>                                                                                                                                             |                                                                                                                                                                                                                                                                                                                                                                                                                                                                                                                                                                                                   |
| <b>Theoretical framework</b>                                                                                                                                              |                                                                                                                                                                                                                                                                                                                                                                                                                                                                                                                                                                                                   |

|                                                                                                                                                                                                    |                                                                                                                                                                                                                                                                                                                                                                                                                                                                                                                                                                                                                                                                                                                     |
|----------------------------------------------------------------------------------------------------------------------------------------------------------------------------------------------------|---------------------------------------------------------------------------------------------------------------------------------------------------------------------------------------------------------------------------------------------------------------------------------------------------------------------------------------------------------------------------------------------------------------------------------------------------------------------------------------------------------------------------------------------------------------------------------------------------------------------------------------------------------------------------------------------------------------------|
| 9. Methodological orientation and Theory. What methodological orientation was stated to underpin the study? e.g. grounded theory, discourse analysis, ethnography, phenomenology, content analysis | <p>The methodological approach was that of Participatory Learning and Action, a participatory and democratic approach to the generation and analysis of data.</p> <p>The theoretical framework used was Normalisation Process Theory. This is a mid-range sociological theory concerned with the work that individuals and organisations have to carry out in order to embed and normalise new, complex ways of working into routine practice. NPT operates through four principal constructs or areas of work: coherence (sense-making work); cognitive participation (engagement work); collective action (enacting work); and reflexive monitoring (appraisal work), each with its own set of sub-constructs</p> |
| <b>Participant selection</b>                                                                                                                                                                       |                                                                                                                                                                                                                                                                                                                                                                                                                                                                                                                                                                                                                                                                                                                     |
| 10. Sampling How were participants selected? e.g. purposive, convenience, consecutive, snowball                                                                                                    | There was no participant sampling; all 18 members of the RESTORE team participated in the NPT training and in the evaluation of that training.                                                                                                                                                                                                                                                                                                                                                                                                                                                                                                                                                                      |
| 11. Method of approach How were participants approached? e.g. face-to-face, telephone, mail, email                                                                                                 | N/A.                                                                                                                                                                                                                                                                                                                                                                                                                                                                                                                                                                                                                                                                                                                |
| 12. Sample size How many participants were in the study?                                                                                                                                           | N/A.                                                                                                                                                                                                                                                                                                                                                                                                                                                                                                                                                                                                                                                                                                                |
| 13. Non-participation How many people refused to participate or dropped out? Reasons?                                                                                                              | All members of the RESTORE team participated in the training and evaluation of that training; there were no drop-outs.                                                                                                                                                                                                                                                                                                                                                                                                                                                                                                                                                                                              |
| <b>Setting</b>                                                                                                                                                                                     |                                                                                                                                                                                                                                                                                                                                                                                                                                                                                                                                                                                                                                                                                                                     |
| 14. Setting of data collection Where was the data collected? e.g. home, clinic, workplace                                                                                                          | Data on the evaluation of the training were collected at each face-to-face RESTORE Consortium meeting. These meetings were held in the participating institutions across the 6 RESTORE countries: Austria, England, Greece, Ireland, the Netherlands and Scotland.                                                                                                                                                                                                                                                                                                                                                                                                                                                  |
| 15. Presence of non-participants Was anyone else present besides the participants and researchers?                                                                                                 | No.                                                                                                                                                                                                                                                                                                                                                                                                                                                                                                                                                                                                                                                                                                                 |
| 16. Description of sample What are the                                                                                                                                                             | The RESTORE research team consisting of 8 project applicants, all senior primary care academics;                                                                                                                                                                                                                                                                                                                                                                                                                                                                                                                                                                                                                    |

1  
2  
3  
4  
5  
6  
7  
8  
9  
10  
11  
12  
13  
14  
15  
16  
17  
18  
19  
20  
21  
22  
23  
24  
25  
26  
27  
28  
29  
30  
31  
32  
33  
34  
35  
36  
37  
38  
39  
40  
41  
42  
43  
44  
45  
46  
47  
48  
49

|                                                                                                   |                                                                                                                                                                                                                                                                                                                                                                                                                                                                                                                                                                                                                                                                                                                                                                                                                                                                                          |
|---------------------------------------------------------------------------------------------------|------------------------------------------------------------------------------------------------------------------------------------------------------------------------------------------------------------------------------------------------------------------------------------------------------------------------------------------------------------------------------------------------------------------------------------------------------------------------------------------------------------------------------------------------------------------------------------------------------------------------------------------------------------------------------------------------------------------------------------------------------------------------------------------------------------------------------------------------------------------------------------------|
| important characteristics of the sample? e.g. demographic data, date                              | and 10 researchers. Professional backgrounds included general practitioners/family doctors; social/cultural anthropologists; sociologists; health services/primary care researchers.                                                                                                                                                                                                                                                                                                                                                                                                                                                                                                                                                                                                                                                                                                     |
| <b>Data collection</b>                                                                            |                                                                                                                                                                                                                                                                                                                                                                                                                                                                                                                                                                                                                                                                                                                                                                                                                                                                                          |
| 17. Interview guide Were questions, prompts, guides provided by the authors? Was it pilot tested? | Data were collected from the RESTORE team in a number of ways – all consistent with the methodological approach on Participatory Learning in Action. As described the paper methods included: written lists of the 3 most positive and 3 most negative features of the training; speed evaluation where each participant was given two minutes to verbally record which aspects of training had, or had not, been effective for them; scoring elements of the training on a Likert scale (e.g. from 1 = very poor to 5 = very good). These data were collected either as short written comments or recorded on a digital recorder. Additional evaluation was conducted approximately three weeks after the first session, when the team were emailed a short set of questions asking what had worked well; what had not worked well; and what they wanted from future training sessions. |
| 18. Repeat interviews Were repeat interviews carried out? If yes, how many?                       | No                                                                                                                                                                                                                                                                                                                                                                                                                                                                                                                                                                                                                                                                                                                                                                                                                                                                                       |
| 19. Audio/visual recording Did the research use audio or visual recording to collect the data?    | Some feedback was recorded on a digital recorder.                                                                                                                                                                                                                                                                                                                                                                                                                                                                                                                                                                                                                                                                                                                                                                                                                                        |
| 20. Field notes Were field notes made during and/or after the interview or focus group?           | No                                                                                                                                                                                                                                                                                                                                                                                                                                                                                                                                                                                                                                                                                                                                                                                                                                                                                       |
| 21. Duration What was the duration of the interviews or focus group?                              | N/A                                                                                                                                                                                                                                                                                                                                                                                                                                                                                                                                                                                                                                                                                                                                                                                                                                                                                      |
| 22. Data saturation Was data saturation discussed?                                                | N/A                                                                                                                                                                                                                                                                                                                                                                                                                                                                                                                                                                                                                                                                                                                                                                                                                                                                                      |
| 23. Transcripts returned Were transcripts returned to participants for comment and/or correction? | N/A. Evaluation comments were collated and feedback to the team at the next face-to-face meeting to permit discussion and clarification.                                                                                                                                                                                                                                                                                                                                                                                                                                                                                                                                                                                                                                                                                                                                                 |

|                                                                                                                                                            |  |                                                                                                                                                                                                 |
|------------------------------------------------------------------------------------------------------------------------------------------------------------|--|-------------------------------------------------------------------------------------------------------------------------------------------------------------------------------------------------|
| <b>Domain 3: analysis and findings</b>                                                                                                                     |  |                                                                                                                                                                                                 |
| <b>Data analysis</b>                                                                                                                                       |  |                                                                                                                                                                                                 |
| 24. Number of data coders How many data coders coded the data?                                                                                             |  | All the evaluation feedback was reviewed by the four members of the training team and the findings summarised into 'what worked', 'what didn't work' and 'what the team would like to do next'. |
| 25. Description of the coding tree Did authors provide a description of the coding tree?                                                                   |  | N/A                                                                                                                                                                                             |
| 26. Derivation of themes Were themes identified in advance or derived from the data?                                                                       |  | N/A                                                                                                                                                                                             |
| 27. Software What software, if applicable, was used to manage the data?                                                                                    |  | No software was used                                                                                                                                                                            |
| 28. Participant checking Did participants provide feedback on the findings?                                                                                |  | Evaluation feedback was presented back to the team for discussion and clarification.                                                                                                            |
| <b>Reporting</b>                                                                                                                                           |  |                                                                                                                                                                                                 |
| 29. Quotations presented Were participant quotations presented to illustrate the themes / findings? Was each quotation identified? e.g. participant number |  | Yes – quotations have a descriptor that is non-identifiable of individuals.                                                                                                                     |
| 30. Data and findings consistent Was there consistency between the data presented and the findings?                                                        |  | Yes.                                                                                                                                                                                            |
| 31. Clarity of major themes Were major themes clearly presented in the findings?                                                                           |  | N/A                                                                                                                                                                                             |
| 32. Clarity of minor themes Is there a description of diverse cases or discussion of minor themes?                                                         |  | N/A.                                                                                                                                                                                            |



1  
2  
3  
4  
5  
6  
7  
8  
9  
10  
11  
12  
13  
14  
15  
16  
17  
18  
19  
20  
21  
22  
23  
24  
25  
26  
27  
28  
29  
30  
31  
32  
33  
34  
35  
36  
37  
38  
39  
40  
41  
42  
43  
44  
45  
46  
47  
48  
49

|  |  |
|--|--|
|  |  |
|  |  |

For peer review only

O'Donnell et al.

**Supporting the use of theory in cross-country health services research: Normalisation Process Theory as an example**

**Reporting Checklist.**

**Checklist used:** Smith L, Rosenzweig L, Schmidt M. Best practices in the reporting of participatory action research: Embracing both the forest and the trees. The Counseling Psychologist 2010;**38**(8):1115-38

**Guidelines for the reporting of participatory action research (PAR).**

| Criteria from Smith et al                    | As reported in O'Donnell et al                                                                                                                                                                                                                                                                                                                                                                                                                                                                                                                                                                                                                                                                                                                         |
|----------------------------------------------|--------------------------------------------------------------------------------------------------------------------------------------------------------------------------------------------------------------------------------------------------------------------------------------------------------------------------------------------------------------------------------------------------------------------------------------------------------------------------------------------------------------------------------------------------------------------------------------------------------------------------------------------------------------------------------------------------------------------------------------------------------|
| <b>Organisational structure of the paper</b> | <p>We have based the organizational structure of our paper on the guidance issued by BMJ Open. We have, therefore, reported using the structure of Introduction, Methods, Results, Discussion.</p> <p>While we have sought to match the content of each section to the general expectations of the BMJ Open audience, the Methods section contains a more descriptive account on the way that the training programme evolved and developed in response to the needs of the research team.</p> <p>Again, the discussion section moves beyond a conventional discussion and is the place where we include our generic recommendations which, we believe, could be applied to the development of training in the use of other theoretical frameworks.</p> |
| <b>Key elements of the project</b>           | <p>Please note: in the application of this checklist, the term 'project' is taken to apply to the training programme in the use of NPT (hereafter described as the 'NPT training programme', which is the subject of this paper. Where necessary, we also refer to RESTORE, which was the FP7 funded research project that the NPT training programme was designed to support. We hope this</p>                                                                                                                                                                                                                                                                                                                                                        |

1  
2  
3  
4  
5  
6  
7  
8  
9  
10  
11  
12  
13  
14  
15  
16  
17  
18  
19  
20  
21  
22  
23  
24  
25  
26  
27  
28  
29  
30  
31  
32  
33  
34  
35  
36  
37  
38  
39  
40  
41  
42  
43  
44  
45  
46  
47  
48  
49

|                                                  |                                                                                                                                                                                                                                                                                                                                                                                                                                                                                                                                                                                                                                                                                                                                                                                                                                                                                                                                                                                                                                                                                                                                                                                                                                                                                                                                                              |
|--------------------------------------------------|--------------------------------------------------------------------------------------------------------------------------------------------------------------------------------------------------------------------------------------------------------------------------------------------------------------------------------------------------------------------------------------------------------------------------------------------------------------------------------------------------------------------------------------------------------------------------------------------------------------------------------------------------------------------------------------------------------------------------------------------------------------------------------------------------------------------------------------------------------------------------------------------------------------------------------------------------------------------------------------------------------------------------------------------------------------------------------------------------------------------------------------------------------------------------------------------------------------------------------------------------------------------------------------------------------------------------------------------------------------|
|                                                  | distinction is clear in our responses below.                                                                                                                                                                                                                                                                                                                                                                                                                                                                                                                                                                                                                                                                                                                                                                                                                                                                                                                                                                                                                                                                                                                                                                                                                                                                                                                 |
| How was the project initiated?                   | <p>The NPT training programme was initiated in response to the needs of the RESTORE research team, to support them in their understanding and use of the theoretical framework being used. This is described in the paper as follows:</p> <p><b>Introduction, Page 7:</b> Research teams must be comfortable and aligned with the use of the selected theory and in agreement about the meaning and application of its individual components or constructs. Such challenges are enhanced when teams are working in different settings, countries and across language as construct understanding and implementation are likely to be both culturally and context-dependent. This mirrors challenges identified in conducting qualitative research across different settings.<sup>26</sup> These challenges faced the EU-funded RESTORE project, a multi-site implementation study across six European countries (Box 1).<sup>27</sup> Focussed on cross-cultural communication in primary care, the design and analysis of RESTORE was underpinned throughout by a recognised theoretical framework - Normalisation Process Theory (NPT). However, the application of theory to a research study was a new concept for many members of the team. As a result, we had to develop a training programme to familiarise and support the team in this process.</p> |
| What was the project’s timeframe?                | <p>The RESTORE project was a 48-month project (see Figure 1); the NPT training programme was initiated at month 8 and ran in tandem with the project. This is described on Page 12 and illustrated in Figure 2:</p> <p><b>Methods, Page 12: Application of theory to the RESTORE study</b></p> <p>As described previously, the RESTORE project was designed in three, inter-related stages (Figure 1). Although not entirely linear, the study was designed to broadly align to the four constructs of NPT (Figure 2). Stage 1 focused on familiarisation, first on the broad need to apply theory to RESTORE and then, with NPT itself. Stage 2 mapped to coherence and cognitive participation; Stage 3 mapped to collective action and reflexive monitoring. This structure then influenced the design of the training for the team, which is now described in detail.</p>                                                                                                                                                                                                                                                                                                                                                                                                                                                                                |
| Who were the participants and/or co-researchers? | <p>The participants were the 19 members of the RESTORE research team. They were also the co-researchers in the design, application and evaluation of the NPT training programme. The team consisted of the senior academics who wrote the RESTORE funding application and the researchers who were employed on RESTORE. The team was multi-professional and multi-disciplinary, consisting of academic general practitioners/family doctors, anthropologists, social</p>                                                                                                                                                                                                                                                                                                                                                                                                                                                                                                                                                                                                                                                                                                                                                                                                                                                                                     |

|                                                                                  |                                                                                                                                                                                                                                                                                                                                                                                                                                                                                                                                                                                                                                                                                                                                                                                                                                                                                                                                                                                                                                                                                                                                                                                                                                      |
|----------------------------------------------------------------------------------|--------------------------------------------------------------------------------------------------------------------------------------------------------------------------------------------------------------------------------------------------------------------------------------------------------------------------------------------------------------------------------------------------------------------------------------------------------------------------------------------------------------------------------------------------------------------------------------------------------------------------------------------------------------------------------------------------------------------------------------------------------------------------------------------------------------------------------------------------------------------------------------------------------------------------------------------------------------------------------------------------------------------------------------------------------------------------------------------------------------------------------------------------------------------------------------------------------------------------------------|
|                                                                                  | <p>scientists and health services/primary care researchers.</p> <p>The composition of the team is described in the <b>abstract</b>, in <b>Methods page 9</b> and more fully in <b>Supplementary File 1</b>.</p> <p><b>Abstract: Participants:</b> RESTORE research team consisting 8 project applicants, all senior primary care academics; 10 researchers. Professional backgrounds included 7 academic general practitioners; 4 social/cultural anthropologists; 4 sociologists; 3 health services/primary care researchers.</p> <p><b>Methods, Page 9: The RESTORE Team</b></p> <p>The research team included research and clinical disciplines, with a wide range of expertise and knowledge of the chosen theoretical framework (Supplementary File 1). Three country teams (Austria, Greece and the Netherlands) had no experience of using NPT. Four team members (MacFarlane, Mair, Dowrick and O'Donnell) had extensive experience of using NPT<sup>33-36</sup> including applying NPT prospectively to complex interventions.<sup>29 37-39</sup> These four team members thus formed the NPT trainers group, leading the development and delivery of the training reported here.</p>                                       |
| <p>What was the extent of their participation and the nature of their roles?</p> | <p>Four members of the team were experienced in the application of NPT to research projects and so took on the role of NPT programme trainers. The other members of the team were fully engaged in th training programme, first by participating in the NPT training programme and second, by their feedback and reflection on the process. Importantly, it was their feedback on the training that led to the continual development and evolution of the training programme.</p> <p>This is reported at various points of the paper, including:</p> <p><b>Methods, Pages 13 – 17:</b> See paper for text.</p> <p><b>Results, Pages 17 – 19:</b> See paper for text.</p> <p><b>Discussion, Page 22:</b> Throughout our training programme, we allowed ample time for concerns to be raised and discussed and for the team to develop solutions. An advantage of the time spent of training was apparent, however, later in the project as we moved onto coding the qualitative data generated across multiple sites. By then, the time spent in early training ensured that the team had a much clearer and consistent view of the constructs and their meaning, leading to a consistency and robustness in coding and analysis.</p> |

1  
2  
3  
4  
5  
6  
7  
8  
9  
10  
11  
12  
13  
14  
15  
16  
17  
18  
19  
20  
21  
22  
23  
24  
25  
26  
27  
28  
29  
30  
31  
32  
33  
34  
35  
36  
37  
38  
39  
40  
41  
42  
43  
44  
45  
46  
47  
48  
49

|                                                                       |                                                                                                                                                                                                                                                                                                                                                                                                                                                                                                                                                                                                                                                                                                                                                                                                                                                                                                                                                                                                                                                                                                                                                                                                                                                                                                                                                                                                                                                                                                                                                                                                                                                                                                                                                                                                                                                                                                                                                                                                                                                                                                                                                                                                                                                                                                                                                                                                                                                                                                                                                                                                                                                                       |
|-----------------------------------------------------------------------|-----------------------------------------------------------------------------------------------------------------------------------------------------------------------------------------------------------------------------------------------------------------------------------------------------------------------------------------------------------------------------------------------------------------------------------------------------------------------------------------------------------------------------------------------------------------------------------------------------------------------------------------------------------------------------------------------------------------------------------------------------------------------------------------------------------------------------------------------------------------------------------------------------------------------------------------------------------------------------------------------------------------------------------------------------------------------------------------------------------------------------------------------------------------------------------------------------------------------------------------------------------------------------------------------------------------------------------------------------------------------------------------------------------------------------------------------------------------------------------------------------------------------------------------------------------------------------------------------------------------------------------------------------------------------------------------------------------------------------------------------------------------------------------------------------------------------------------------------------------------------------------------------------------------------------------------------------------------------------------------------------------------------------------------------------------------------------------------------------------------------------------------------------------------------------------------------------------------------------------------------------------------------------------------------------------------------------------------------------------------------------------------------------------------------------------------------------------------------------------------------------------------------------------------------------------------------------------------------------------------------------------------------------------------------|
| <p>What was the process within and/or methodology of the project?</p> | <p>The methodology of the work was informed by Participatory Learning and Action (PLA), mirroring the use of PLA in the wider RESTORE project itself. Throughout, we collected qualitative data from the RESTORE team on their views of the training sessions, analysed these data thematically and used the findings to inform the design of later training sessions. This is described in the paper:</p> <p><b>Methods, Page 14:</b> This approach, however, proved too prescriptive and over-whelming for team members trying to assimilate knowledge about applying theory to research (see Results). This led to several important modifications in the development of the training. In consultation with our PLA experts (MO'RdeB and TdeB), we incorporated more PLA-informed exercises and approaches into the training.<sup>42</sup> Consequently, later sessions had one or at most two short didactic presentations, with the remaining time spent on participatory exercises. The training content was aligned more closely to the temporal arrangement of the project itself and linked to the over-arching constructs of NPT. Thus, we focused principally on sense-making (coherence) and engagement work (cognitive participation) first, before turning to the actual work undertaken (collective action) and, finally, monitoring and appraisal work (reflexive monitoring) (Figure 2).</p> <p><b>Methods, Pages 16-17: Evaluation of the NPT training content</b></p> <p>Face-to-face training was evaluated qualitatively at the end of each training day. Methods included: written lists of the 3 most positive and 3 most negative features of the training; speed evaluation where each participant was given two minutes to verbally record which aspects of training had, or had not, been effective for them; scoring elements of the training on a Likert scale (e.g. from 1 = very poor to 5 = very good). These data were collected either as short written comments or recorded on a digital recorder. Trainers reviewed the feedback thematically and used it to inform subsequent training sessions. Additional evaluation was conducted approximately three weeks after the first session, when the team were emailed a short set of questions asking what had worked well; what had not worked well; and what they wanted from future training sessions. The results of the evaluations were summarised and fed back at RESTORE Consortium meetings providing researchers with a further opportunity to comment on whether they believed all the key issues or suggestions regarding training had been captured and addressed.</p> |
| <p>What were the project outcomes and/or</p>                          | <p>Training outcomes were increased confidence and comfort amongst the RESTORE research team</p>                                                                                                                                                                                                                                                                                                                                                                                                                                                                                                                                                                                                                                                                                                                                                                                                                                                                                                                                                                                                                                                                                                                                                                                                                                                                                                                                                                                                                                                                                                                                                                                                                                                                                                                                                                                                                                                                                                                                                                                                                                                                                                                                                                                                                                                                                                                                                                                                                                                                                                                                                                      |

|                                                                                                                                                                                                                                                                                           |                                                                                                             |                                                                                                                                                                                                                                                                                                                                                                                                                                                                                       |
|-------------------------------------------------------------------------------------------------------------------------------------------------------------------------------------------------------------------------------------------------------------------------------------------|-------------------------------------------------------------------------------------------------------------|---------------------------------------------------------------------------------------------------------------------------------------------------------------------------------------------------------------------------------------------------------------------------------------------------------------------------------------------------------------------------------------------------------------------------------------------------------------------------------------|
| 1<br>2<br>3<br>4<br>5<br>6<br>7<br>8<br>9<br>10<br>11<br>12<br>13<br>14<br>15<br>16<br>17<br>18<br>19<br>20<br>21<br>22<br>23<br>24<br>25<br>26<br>27<br>28<br>29<br>30<br>31<br>32<br>33<br>34<br>35<br>36<br>37<br>38<br>39<br>40<br>41<br>42<br>43<br>44<br>45<br>46<br>47<br>48<br>49 | emergent actions?                                                                                           | in (i) the use of theory in health services research projects; (ii) understanding of NPT.                                                                                                                                                                                                                                                                                                                                                                                             |
|                                                                                                                                                                                                                                                                                           | What comes next (if the project is on-going)?                                                               | The RESTORE project is now finished. We hope, however, that this paper and our generic recommendations can be used to support training for other health service research projects whether they are using NPT or another theoretical framework. See <b>Discussion, Page 21</b> .                                                                                                                                                                                                       |
|                                                                                                                                                                                                                                                                                           | Consider charts, guidelines, tables, graphics to convey part or all of the project design                   | We have illustrated our data with a number of Figures and Illustrations.                                                                                                                                                                                                                                                                                                                                                                                                              |
|                                                                                                                                                                                                                                                                                           |                                                                                                             |                                                                                                                                                                                                                                                                                                                                                                                                                                                                                       |
|                                                                                                                                                                                                                                                                                           | <b>Convey the experiences of the co-researchers</b>                                                         |                                                                                                                                                                                                                                                                                                                                                                                                                                                                                       |
|                                                                                                                                                                                                                                                                                           | Pay attention to who is writing the article and how their voices and experiences are represented            | Although the lead author (COD) was one of the trainers, the paper has actively involved all members of the team. Therefore, we believe that all the voices of the RESTORE team are represented in this work.                                                                                                                                                                                                                                                                          |
|                                                                                                                                                                                                                                                                                           | Pay attention to who is <i>not</i> writing the article and how their voices and experiences are represented | See above.                                                                                                                                                                                                                                                                                                                                                                                                                                                                            |
|                                                                                                                                                                                                                                                                                           | What were the personal outcomes of the project?                                                             | A principal aim was to increase individuals' knowledge, expertise and confidence both in the use of theory in health services research projects more generally, and in the use of NPT in particular. We believe that we evidence that these personal outcomes were met. In addition, the team's level of understanding and confidence had the unintended consequence of aiding later processes within the RESTORE project such as cross-country qualitative data coding and analysis. |
|                                                                                                                                                                                                                                                                                           |                                                                                                             |                                                                                                                                                                                                                                                                                                                                                                                                                                                                                       |
|                                                                                                                                                                                                                                                                                           | <b>Address the challenges, pitfalls, and limitations of the project</b>                                     |                                                                                                                                                                                                                                                                                                                                                                                                                                                                                       |
|                                                                                                                                                                                                                                                                                           | What were they?                                                                                             | We have discussed the general strengths and limitations of the project in the discussion:<br><b>Discussion, Page 23: Strengths and Limitations</b><br>This training programme in the use of a mid-level theory was developed for a multi-disciplinary team working across 6 European countries; thus, it also had to pay careful attention to both language and cultural differences across the RESTORE research team. The evaluation and careful                                     |

1  
2  
3  
4  
5  
6  
7  
8  
9  
10  
11  
12  
13  
14  
15  
16  
17  
18  
19  
20  
21  
22  
23  
24  
25  
26  
27  
28  
29  
30  
31  
32  
33  
34  
35  
36  
37  
38  
39  
40  
41  
42  
43  
44  
45  
46  
47  
48  
49

|                               |                                                                                                                                                                                                                                                                                                                                                                                                                                                                                                                                                                                                                                                                                                                                                                                                                                                                                                                                                                                                                                                                                                                                                                                                                                                                                                                                                                                                                                                                                                                                                                                                                                                                                                                                                                                                                                                                                        |
|-------------------------------|----------------------------------------------------------------------------------------------------------------------------------------------------------------------------------------------------------------------------------------------------------------------------------------------------------------------------------------------------------------------------------------------------------------------------------------------------------------------------------------------------------------------------------------------------------------------------------------------------------------------------------------------------------------------------------------------------------------------------------------------------------------------------------------------------------------------------------------------------------------------------------------------------------------------------------------------------------------------------------------------------------------------------------------------------------------------------------------------------------------------------------------------------------------------------------------------------------------------------------------------------------------------------------------------------------------------------------------------------------------------------------------------------------------------------------------------------------------------------------------------------------------------------------------------------------------------------------------------------------------------------------------------------------------------------------------------------------------------------------------------------------------------------------------------------------------------------------------------------------------------------------------|
|                               | <p>monitoring of both the development and delivery of the training is a clear strength of this work. That the training programme was acceptable to such a diverse group is another strength. Weaknesses include the small group of researchers involved, although the team did include a range of disciplinary and research backgrounds. The training was focused on the use of only one theoretical framework – NPT – but we believe that the lessons learned from this and the recommendations arising from the work are applicable to other theoretical frameworks.</p>                                                                                                                                                                                                                                                                                                                                                                                                                                                                                                                                                                                                                                                                                                                                                                                                                                                                                                                                                                                                                                                                                                                                                                                                                                                                                                             |
| <p>How were they managed?</p> | <p>A particular challenge in the training programme was managing the different levels of knowledge and expertise within the team. One important lesson was the need to build in time for critical reflection and discussion of the process – this is discussed within the Results section.</p> <p><b>Results, Page 18:</b> Interactive exercises and role play designed to focus on coherence and cognitive participation also spontaneously picked up issues relating to collective action (who would actually do the work; how would it be funded) and reflexive monitoring (how would teams know if professional interpreters had an impact). This served as an important reminder that, even when NPT sensitising questions from researchers were designed to focus on sense-making and engagement, other issues would naturally emerge in the discussion, emphasising the lack of linearity in the application of theory to data generation.</p> <p>On-going telephone and email contact ensured that difficulties and tensions were quickly surfaced, particularly when theory was being applied to fieldwork. Training at month 20 began with an intensive de-briefing, where in-country teams were encouraged to freely discuss their concerns and challenges arising from using NPT. These focussed on two, related, concerns. There was a continued lack of confidence in their knowledge of NPT itself and of being able to correctly map issues and data generated in the field to the NPT constructs. However, the use of visual methods of collecting and displaying data generated during the interactive group exercises, as exemplified in PLA approaches,<sup>42</sup> meant that the trainers could quickly identify a high degree of fidelity in the assignment of data to NPT constructs, thus reassuring the team of their knowledge development (Figure 4).</p> |
| <p>What can we learn?</p>     | <p>We believe that a key message from our work is the set of generic recommendations which could be applied to other training programmes seeking to support the use of theory in health services research projects. These are detailed in the <b>Discussion, pages 21 – 23.</b></p>                                                                                                                                                                                                                                                                                                                                                                                                                                                                                                                                                                                                                                                                                                                                                                                                                                                                                                                                                                                                                                                                                                                                                                                                                                                                                                                                                                                                                                                                                                                                                                                                    |

# BMJ Open

## Supporting the use of theory in cross-country health services research: A participatory qualitative approach using Normalisation Process Theory as an example

|                                 |                                                                                                                                                                                                                                                                                                                                                                                                                                                                                                                                                                                                                                                                                                                                                                                                                                                                                                                                                                                                                                                                                                                                                                                                                                                                                                                                                                                                                                                                                                                                                                                                                                                                                                                                                                                                                                                                                                                                                                                                                           |
|---------------------------------|---------------------------------------------------------------------------------------------------------------------------------------------------------------------------------------------------------------------------------------------------------------------------------------------------------------------------------------------------------------------------------------------------------------------------------------------------------------------------------------------------------------------------------------------------------------------------------------------------------------------------------------------------------------------------------------------------------------------------------------------------------------------------------------------------------------------------------------------------------------------------------------------------------------------------------------------------------------------------------------------------------------------------------------------------------------------------------------------------------------------------------------------------------------------------------------------------------------------------------------------------------------------------------------------------------------------------------------------------------------------------------------------------------------------------------------------------------------------------------------------------------------------------------------------------------------------------------------------------------------------------------------------------------------------------------------------------------------------------------------------------------------------------------------------------------------------------------------------------------------------------------------------------------------------------------------------------------------------------------------------------------------------------|
| Journal:                        | <i>BMJ Open</i>                                                                                                                                                                                                                                                                                                                                                                                                                                                                                                                                                                                                                                                                                                                                                                                                                                                                                                                                                                                                                                                                                                                                                                                                                                                                                                                                                                                                                                                                                                                                                                                                                                                                                                                                                                                                                                                                                                                                                                                                           |
| Manuscript ID                   | bmjopen-2016-014289.R2                                                                                                                                                                                                                                                                                                                                                                                                                                                                                                                                                                                                                                                                                                                                                                                                                                                                                                                                                                                                                                                                                                                                                                                                                                                                                                                                                                                                                                                                                                                                                                                                                                                                                                                                                                                                                                                                                                                                                                                                    |
| Article Type:                   | Research                                                                                                                                                                                                                                                                                                                                                                                                                                                                                                                                                                                                                                                                                                                                                                                                                                                                                                                                                                                                                                                                                                                                                                                                                                                                                                                                                                                                                                                                                                                                                                                                                                                                                                                                                                                                                                                                                                                                                                                                                  |
| Date Submitted by the Author:   | 16-Apr-2017                                                                                                                                                                                                                                                                                                                                                                                                                                                                                                                                                                                                                                                                                                                                                                                                                                                                                                                                                                                                                                                                                                                                                                                                                                                                                                                                                                                                                                                                                                                                                                                                                                                                                                                                                                                                                                                                                                                                                                                                               |
| Complete List of Authors:       | <p>O'Donnell, Kate; University of Glasgow, General Practice &amp; Primary Care<br/> Mair, Frances; University of Glasgow, General Practice and Primary Care<br/> Dowrick, CF; University of Liverpool, Institute of Psychology, Health and Society<br/> O'Reillyde Brun, Mary; NUI Galway, Discipline of General Practice<br/> de Brún, Tomas; NUI Galway, Discipline of General Practice<br/> Burns, Nicola; University of Glasgow, General Practice and Primary Care,<br/> Institute of Health &amp; Wellbeing, College of Medical, Veterinary and Life<br/> Sciences; Lancaster University, Lancaster Medical School, Faculty of Health<br/> and Medicine, Furness College<br/> Lionis, Christos; Medical Faculty, University of Crete, Greece,<br/> Saridaki, Aristeia; Medical Faculty, University of Crete, Greece<br/> Papadakaki, Maria; Technological Educational Institute of Crete,<br/> Department of Social Work; Medical Faculty, University of Crete, Greece<br/> van den Muijsenbergh, Maria; Radboud University Nijmegen Medical<br/> Centre, Department of Primary and Community Care; Pharos Centre of<br/> Expertise on Health Disparities<br/> van Weel-Baumgarten, Evelyn; Radboud University Nijmegen Medical<br/> Centre, Department of Primary and Community Care<br/> Gravenhorst, Katja; University of Liverpool, Institute of Psychology, Health<br/> and Society<br/> Cooper, Lucy<br/> Princz, Christine; Medical University of Vienna, Centre for Public Health<br/> Teunissen, Erik; Radboud university medical center, Department of Primary<br/> and Community Care, Nijmegen, Netherlands<br/> van den Driessen Mareeuw, Francine; Radboud university medical center,<br/> Department of Primary and Community Care, Nijmegen, Netherlands<br/> Vlachadi, Maria; University of Crete, Department of Political Sciences<br/> Spiegel, Wolfgang; Medical University of Vienna, Centre for Public Health<br/> Macfarlane, Anne; University of Limerick, Graduate Entry Medical School</p> |
| <b>Primary Subject Heading</b>: | Health services research                                                                                                                                                                                                                                                                                                                                                                                                                                                                                                                                                                                                                                                                                                                                                                                                                                                                                                                                                                                                                                                                                                                                                                                                                                                                                                                                                                                                                                                                                                                                                                                                                                                                                                                                                                                                                                                                                                                                                                                                  |
| Secondary Subject Heading:      | Research methods, Qualitative research                                                                                                                                                                                                                                                                                                                                                                                                                                                                                                                                                                                                                                                                                                                                                                                                                                                                                                                                                                                                                                                                                                                                                                                                                                                                                                                                                                                                                                                                                                                                                                                                                                                                                                                                                                                                                                                                                                                                                                                    |
| Keywords:                       | Theory, Training, Health services research, Normalisation Process Theory                                                                                                                                                                                                                                                                                                                                                                                                                                                                                                                                                                                                                                                                                                                                                                                                                                                                                                                                                                                                                                                                                                                                                                                                                                                                                                                                                                                                                                                                                                                                                                                                                                                                                                                                                                                                                                                                                                                                                  |
|                                 |                                                                                                                                                                                                                                                                                                                                                                                                                                                                                                                                                                                                                                                                                                                                                                                                                                                                                                                                                                                                                                                                                                                                                                                                                                                                                                                                                                                                                                                                                                                                                                                                                                                                                                                                                                                                                                                                                                                                                                                                                           |



1  
2  
3  
4  
5  
6  
7  
8  
9  
10  
11  
12  
13  
14  
15  
16  
17  
18  
19  
20  
21  
22  
23  
24  
25  
26  
27  
28  
29  
30  
31  
32  
33  
34  
35  
36  
37  
38  
39  
40  
41  
42  
43  
44  
45  
46  
47  
48  
49  
50  
51  
52  
53  
54  
55  
56  
57  
58  
59  
60

SCHOLARONE™  
Manuscripts

For peer review only

1  
2  
3 **Supporting the use of theory in cross-country health services research: A participatory qualitative**  
4  
5 **approach using Normalisation Process Theory as an example**  
6  
7

8  
9 **Catherine A O'Donnell<sup>1\*</sup>, Frances S Mair<sup>1</sup>, Christopher Dowrick<sup>2</sup>, Mary O'Reilly-de Brún<sup>3</sup>, Tomas de**  
10 **Brún<sup>3</sup>, Nicola Burns<sup>1,4</sup>, Christos Lionis<sup>5</sup>, Aristoula Saridaki<sup>5</sup>, Maria Papadakaki<sup>5,6</sup>, Maria van den**  
11 **Muijsenbergh<sup>7,8</sup>, Evelyn van Weel-Baumgarten<sup>7</sup>, Katja Gravenhorst<sup>2</sup>, Lucy Cooper<sup>2</sup>, Christine**  
12 **Princz<sup>9</sup>, Erik Teunissen<sup>7</sup>, Francine van den Driessen Mareeuw<sup>7</sup>, Maria Vlahadi<sup>5</sup>, Wolfgang Spiegel<sup>9</sup>,**  
13 **and Anne MacFarlane<sup>10</sup>**  
14  
15  
16  
17  
18  
19

- 20  
21  
22  
23 1. General Practice and Primary Care, Institute of Health and Wellbeing, College of MVLS, University  
24 of Glasgow, 1 Horselethill Road, Glasgow, Scotland, G12 9LX, UK  
25  
26  
27 2. Institute of Psychology, Health and Society, University of Liverpool, Waterhouse Building, Block B,  
28 1st Floor, 1-5 Brownlow Street, Liverpool, L69 3GL, UK  
29  
30  
31 3. Discipline of General Practice, School of Medicine, National University of Ireland, Galway, Ireland  
32  
33 4. Faculty of Health and Medicine, Lancaster Medical School, Furness College, University of  
34 Lancaster, Lancaster, UK  
35  
36  
37 5. Faculty of Medicine, University of Crete, Heraklion, Greece  
38  
39  
40 6. Department of Social Work, School of Health and Social Welfare, Technological Educational  
41 Institute of Crete, Heraklion, Crete  
42  
43  
44 7. Department of Primary and Community Care, Radboud University Nijmegen Medical Centre,  
45 Nijmegen, The Netherlands  
46  
47  
48 8. Pharos Centre of Expertise on Health Disparities, Utrecht, The Netherlands  
49  
50  
51 9. Centre for Public Health, Medical University of Vienna, Vienna, Austria  
52  
53 10. Graduate Entry Medical School, University of Limerick, Limerick, Ireland  
54

55 **\*Corresponding Author**

56 **Email: Kate.O'Donnell@glasgow.ac.uk; Tel: +44 141 330 8329.**  
57  
58  
59  
60

1  
2  
3  
4  
5  
6  
7  
8  
9  
10  
11  
12  
13  
14  
15  
16  
17  
18  
19  
20  
21  
22  
23  
24  
25  
26  
27  
28  
29  
30  
31  
32  
33  
34  
35  
36  
37  
38  
39  
40  
41  
42  
43  
44  
45  
46  
47  
48  
49  
50  
51  
52  
53  
54  
55  
56  
57  
58  
59  
60

For peer review only

## Abstract

**Objectives:** To describe and reflect on the process of designing and delivering a training programme supporting the use of theory, in this case Normalisation Process Theory (NPT), in a multi-site cross-country health services research study.

**Design:** Participatory research approach utilising qualitative methods.

**Setting:** Six European primary care settings involving research teams from Austria, England, Greece, Ireland, The Netherlands and Scotland.

**Participants:** RESTORE research team consisting of 8 project applicants, all senior primary care academics; and 10 researchers. Professional backgrounds included general practitioners/family doctors; social/cultural anthropologists; sociologists; health services/primary care researchers.

**Primary outcome measures:** Views of all research team members (n=18) were assessed using qualitative evaluation methods, analysed qualitatively by the trainers after each session.

**Results:** Most of the team had no experience of using NPT and many had not applied theory to prospective, qualitative research projects. Early training proved didactic and overloaded participants with information. Drawing on RESTORE's methodological approach of Participatory Learning and Action, workshops using role play, experiential interactive exercises and light-hearted examples not directly related to the study subject matter were developed. Evaluation showed the study team quickly grew in knowledge and confidence in applying theory to fieldwork.

Recommendations applicable to other studies include: accepting that theory application is not a linear process; that time is needed to address researcher concerns with the process; and that experiential, interactive learning is a key device in building conceptual and practical knowledge. An unanticipated benefit was the smooth transition to cross-country qualitative coding of study data.

**Conclusion** A structured programme of training enhanced and supported the prospective application of a theory, NPT, to our work, but raised challenges. These were not unique to NPT, but

1  
2  
3  
4  
5  
6  
7  
8  
9  
10  
11  
12  
13  
14  
15  
16  
17  
18  
19  
20  
21  
22  
23  
24  
25  
26  
27  
28  
29  
30  
31  
32  
33  
34  
35  
36  
37  
38  
39  
40  
41  
42  
43  
44  
45  
46  
47  
48  
49  
50  
51  
52  
53  
54  
55  
56  
57  
58  
59  
60

could arise with the application of any theory, especially in large multi-site, international projects.

The lessons learned are applicable to other theoretically-informed studies.

**Keywords**

Theory; Health services research; Training; Normalisation Process Theory.

For peer review only

### Strengths and Limitations

- The training programme was developed to support the use of a mid-level theory in 6 European countries with different primary care systems and cultures.
- Training development, delivery and evaluation engaged with a multidisciplinary team of clinical and non-clinical researchers encompassing multiple professional disciplines.
- Evaluation and careful monitoring of the training alerted us to delivery challenges and facilitated the development of a participatory approach to learning.
- The group of researchers involved in the design and feedback evaluation was relatively small.
- Training focused on one theory – Normalisation Process Theory – but has resulted in a set of generic recommendations.

## Introduction

Bridging the research to practice gap is a recognised problem in health services research.<sup>12</sup> One important solution is to underpin such research with strong theoretical approaches.<sup>134</sup> Advantages include providing a framework that is generalizable across settings and individuals; incremental generation of knowledge; and a guide for analysis.<sup>356</sup> Theory can also enhance our understanding of the barriers to research translation and implementation and alert us to the context into which new interventions and services are placed.<sup>6-9</sup> However, many interventions and services are implemented with little or no attention to theory.<sup>35</sup> When theories are used, they often guide analysis rather than inform the design and conduct of the overall study.<sup>51011</sup> This may be due, in part, to recognised challenges in applying theory to health services research.

## Challenges in using theory in health services research

The first challenge is a lack of conceptual clarity as to what a 'theory' is. MacDonald describes theory as "an organized, heuristic, coherent, and systematic articulation of a set of statements related to significant questions ..... providing a generalizable form of understanding".<sup>12</sup> There are three recognised levels of 'theory'. Grand theory is abstract and broadly applicable across different areas and subjects.<sup>61213</sup> The next level – mid-range or 'big theory' – is less abstract, addressing specific phenomena and concepts that can be incorporated into testable propositions or questions and inform intervention development.<sup>612</sup> The third level, programme theory, is often considered as 'small' theory, specifying particular components of an intervention in logic models and explicitly linking a programme's processes and inputs to its intended outcomes.<sup>614</sup>

The second challenge is to decide which theory best informs the work being conducted. For example, theory can focus on: explaining individual behaviours and responses (e.g. Theory of Planned Behaviour); understanding organisational responses (e.g. Diffusion of Innovation); dissemination (e.g. Streams of Policy Process); or implementation (e.g. Promoting Action on

1  
2  
3 Research Implementation in Health Services or PARIHS).<sup>15</sup> While theoretical choice is informed by  
4  
5 the research, the disciplinary composition and background of the research team is also influential.<sup>16</sup>  
6  
7 <sup>17</sup> Health services research is often multidisciplinary and draws on many fields including sociology,  
8  
9 psychology, biostatistics, health economics and clinical disciplines. This requires teams to  
10  
11 understand and respect each other's theoretical and paradigmatic positions.<sup>3</sup> The final challenge is a  
12  
13 lack of guidance in applying theory to studies.<sup>7 18</sup>  
14  
15

### 16 17 18 19 **The application of theory in practice**

20  
21 Consideration has been given to how research teams could apply theory in practice. For example,  
22  
23 the Reach, Effectiveness, Adoption, Implementation and Maintenance (RE-AIM) framework was  
24  
25 developed for use in the evaluation of public health programmes and interventions but is now  
26  
27 widely applied.<sup>19 20</sup> RE-AIM focuses researchers' attention on: population reach; the intervention's  
28  
29 adoption, implementation and effectiveness; and, finally, on its maintenance in practice.<sup>20</sup> The  
30  
31 developers of Re-AIM have released training and support for other researchers ([http://www.re-  
32  
33 aim.hnfe.vt.edu/](http://www.re-aim.hnfe.vt.edu/)). However, even with such training available, it is not always applied consistently.  
34  
35 Gaglio identified 71 papers published between 1999-2010 that used RE-AIM;<sup>20</sup> of these, 'reach' was  
36  
37 the most frequently reported dimension, with 'maintenance' reported least often. There was also  
38  
39 variation in the reporting of the individual components of each construct. Most reporting was  
40  
41 quantitative, with little qualitative research to explore how components were used or understood.  
42  
43  
44  
45 Similar results were reported for the PARIHS framework, which describes several interacting  
46  
47 components including clinical and patient experience; local context; culture and leadership; and  
48  
49 facilitation.<sup>21</sup> Again, there was variation in its use across studies, with a lack of detail on the  
50  
51 application of different sub-components to fieldwork.<sup>18 22</sup> Two other reviews examined the  
52  
53 application of the Knowledge to Action (KTA) Framework<sup>23</sup> and Normalisation Process Theory<sup>24</sup> to  
54  
55 implementation studies. In both, the authors found stability in the application of the high level  
56  
57  
58  
59  
60



1  
2  
3 constructs across studies but, again, variation in researchers' attention to the sub-constructs of  
4  
5 each. This lack of 'theory fidelity' has been raised in other fields, notably health promotion.<sup>23 25</sup>  
6  
7

8 Translating the constructs of a chosen theory into interventions can be challenging, especially when  
9  
10 applied across multiple research sites.<sup>5 7 23</sup> Research teams must be comfortable and aligned with the  
11  
12 use of the selected theory and in agreement about the meaning and application of its individual  
13  
14 components or constructs. Such challenges are enhanced when teams are working in different  
15  
16 settings, countries and across cultural and language boundaries as construct understanding and  
17  
18 implementation are likely to be both culturally and context-dependent. This mirrors challenges  
19  
20 identified in conducting qualitative research across different settings.<sup>26</sup> These challenges faced the  
21  
22 EU-funded RESTORE project, a multi-site implementation study across six European countries (Box  
23  
24 1).<sup>27</sup> Focused on cross-cultural communication in primary care, the design and analysis of RESTORE  
25  
26 was underpinned throughout by a recognised mid-level, sociological theory - Normalisation Process  
27  
28 Theory (NPT). However, the application of theory to a research study was a new concept for many  
29  
30 members of the team. As a result, we had to develop a training programme to familiarise and  
31  
32 support the team in this process.  
33  
34  
35

36 The aim of this paper is to describe and reflect on the process of designing training in the use of  
37  
38 theory in a multi-site cross-country research project. We discuss the challenges this brought, as well  
39  
40 as the benefits. Finally, we make recommendations that could be applied to other theoretically-  
41  
42 driven health services research located in multiple settings, regardless of the theory selected.  
43  
44  
45  
46  
47  
48  
49  
50  
51  
52  
53  
54  
55  
56  
57  
58  
59  
60

**Box 1. Description of the RESTORE project and its underpinning theory, Normalisation Process****Theory.<sup>27</sup>**

RESTORE (**RE**search into implementation **ST**ratgies to support patients of different **OR**igins and **language background**) was focused on the implementation of guidance and training initiatives to support cross-cultural consultations in primary care for vulnerable migrant populations: asylum seekers and refugees; migrants in low paid employment; and undocumented migrants.<sup>27 28</sup> Funded by the EU FP7 Programme, RESTORE aimed to bridge the research-practice gap by collecting empirical data on the selection, co-design and implementation of such interventions in five European primary care settings: Austria, England, Greece, Ireland, and the Netherlands. A sixth partner, Scotland, focused on the role of the policy environment and health systems of participating countries.<sup>29</sup>

RESTORE used a participatory research approach – Participatory Learning and Action (PLA) – as its over-arching methodological approach, generating rich, in-depth qualitative data.<sup>27 30 31</sup> This involved a range of stakeholders including primary care practitioners, migrant service users, community interpreters and policy makers. To shape the study approach, facilitate data collection and guide the analysis, a robust theoretical approach was essential. For this, we selected Normalisation Process Theory (NPT), a mid-range sociological theory concerned with the work that individuals and organisations have to carry out in order to embed and normalise new, complex ways of working into routine practice.<sup>32 33</sup> NPT operates through four principal constructs or areas of work: coherence (sense-making work); cognitive participation (engagement work); collective action (enacting work); and reflexive monitoring (appraisal work), each with its own set of sub-constructs. NPT has been applied to a range of studies,<sup>24</sup> including guideline implementation,<sup>34 35</sup> treatment burden in chronic disease<sup>36-38</sup> and evaluating models of care.<sup>8 39</sup>

## Methods

### RESTORE study design

RESTORE was designed and implemented in three stages over 48 months (Figure 1).<sup>27</sup> Stage 1 identified and recruited key stakeholders in each country, including migrants, community interpreters, primary care practitioners and local policy-makers. An extensive mapping exercise was conducted by each in-country RESTORE team to identify guidance and training initiatives (G/TIs) supporting inter-cultural communication in primary care and to assess their initial suitability for implementation<sup>40</sup>. Stage 2 focused on engaging with local stakeholders to review the identified G/TIs and democratically select one for implementation by considering the implementation potential of each G/TI.<sup>41</sup> In Stage 3, the selected G/TI was refined by local stakeholders supported by the in-country RESTORE team, implemented by the stakeholders and RESTORE team, monitored and, where necessary, further refined to improve the chances of sustaining it in routine practice.

INSERT FIGURE 1 HERE.

Although not entirely linear, the study was designed to broadly align to the four constructs of NPT (Figure 2). Stage 1 focused on familiarisation, first on the broad need to apply theory to RESTORE and then, with NPT itself. Stage 2 mapped to coherence and cognitive participation; Stage 3 mapped to collective action and reflexive monitoring. This structure then influenced the design of the training for the team, which is described below.

INSERT FIGURE 2 HERE.

### The RESTORE Team

The research team of 18 included research and clinical disciplines, with a wide range of expertise and knowledge of the chosen theoretical approach (Supplementary File 1). Three country teams (Austria, Greece and the Netherlands) had no experience of using NPT. Four team members (MacFarlane,

1  
2  
3 Mair, Dowrick and O'Donnell) had extensive experience of using NPT<sup>39 42-44</sup> including applying NPT  
4  
5 prospectively to complex interventions.<sup>29 45-47</sup> These four team members thus formed the NPT  
6  
7 trainers group, leading the development and delivery of the training reported here.  
8  
9

### 10 11 12 **Description of the training programme** 13

14  
15 Face-to-face training sessions each lasted one day. Training content was initially developed by the  
16  
17 NPT trainers based on our knowledge of the content that needed to be covered. As time progressed,  
18  
19 however, the content was developed based on feedback and evaluation from the RESTORE team  
20  
21 members. Here we briefly describe the content of the training sessions. More detailed description of  
22  
23 the training sessions and the participatory exercises are contained in Supplementary Files 2 and 3;  
24  
25 the short presentations can be accessed on Slideshare (see Supplementary File 4 for links).  
26  
27  
28  
29  
30

### 31 ***Early project training (Months 1 to 12).*** 32

33  
34 Training began at Month 8, after the RESTORE researchers had been appointed in each country. In  
35  
36 the first session, the rationale for using theory to shape and inform research study design, data  
37  
38 collection and analysis was presented. NPT, the theory chosen to underpin RESTORE, was then  
39  
40 introduced using previous studies as examples as well as the on-line NPT toolkit  
41  
42 (<http://www.normalizationprocess.org/>). Following this, an interactive group exercise helped the  
43  
44 research team to consider what issues might arise during the implementation of professional  
45  
46 interpreters in primary care. To prompt discussion and improve understanding, the team used a set  
47  
48 of 16 NPT-informed questions developed by the NPT trainers along with TdeB. These questions were  
49  
50 also being used to guide the early stages of data analysis in the project (Table 1).<sup>31 41</sup>  
51  
52  
53  
54  
55  
56  
57  
58  
59  
60

1  
2  
3  
4  
5  
6  
7  
8  
9  
10  
11  
12  
13  
14  
15  
16  
17  
18  
19  
20  
21  
22  
23  
24  
25  
26  
27  
28  
29  
30  
31  
32  
33  
34  
35  
36  
37  
38  
39  
40  
41  
42  
43  
44  
45  
46  
47  
48  
49

Table 1. NPT constructs and sub-constructs as applied to RESTORE<sup>31 41</sup>

| Coherence                                                                                                      | Cognitive Participation                                                                                             | Collective Action                                                                                                         | Reflexive Monitoring                                                                                                |
|----------------------------------------------------------------------------------------------------------------|---------------------------------------------------------------------------------------------------------------------|---------------------------------------------------------------------------------------------------------------------------|---------------------------------------------------------------------------------------------------------------------|
| Can stakeholders make sense of the intervention?                                                               | Can stakeholders get others involved in implementing the intervention?                                              | What needs to be done to make the intervention work in practice?                                                          | Can the intervention be monitored and evaluated?                                                                    |
| <b>Differentiation:</b><br>Do stakeholders see this as a new way working?                                      | <b>Enrolment:</b><br>Do the stakeholders believe they are the correct people to drive forward the implementation?   | <b>Interactional workability:</b><br>Does the intervention make it easier or harder to complete tasks?                    | <b>Systematisation:</b><br>Will stakeholders be able to judge the effectiveness of the intervention?                |
| <b>Individual specification:</b><br>Do individuals understand what tasks the intervention requires of them?    | <b>Initiation:</b><br>Are they willing and able to engage others in the implementation?                             | <b>Skill set workability:</b><br>Do those implementing the intervention have the correct skills and training for the job? | <b>Individual appraisal:</b><br>How will individuals judge the effectiveness of the intervention?                   |
| <b>Communal specification:</b><br>Do all those involved agree about the purpose of the intervention?           | <b>Activation:</b><br>Can stakeholders identify what tasks and activities are required to sustain the intervention? | <b>Relational integration:</b><br>Do those involved in the implementation have confidence in the new way of working?      | <b>Communal appraisal:</b><br>How will stakeholders collectively judge the effectiveness of the intervention?       |
| <b>Internalisation:</b><br>Do all the stakeholders grasp the potential benefits and value of the intervention? | <b>Legitimation:</b><br>Do they believe it is appropriate for them to be involved in the intervention?              | <b>Contextual integration:</b><br>Do local and national resources and policies support the implementation?                | <b>Reconfiguration:</b><br>Will stakeholders be able to modify the intervention based on evaluation and experience? |

1  
2  
3 ***Mid-project training (Months 13 to 24).***  
4

5 At month 13, we focused on the NPT constructs of coherence (sense-making) and cognitive  
6 participation (engagement). Learning from early training, we first used a non-RESTORE 'light'  
7 example with a humorous exercise which all the team could relate to – namely, could you  
8 contemplate staying in a circus tent at a future RESTORE team meeting? (Figure 3)  
9

10  
11  
12  
13  
14  
15 INSERT FIGURE 3 HERE  
16

17 Following this, a RESTORE specific role play was employed to think through the issues of using  
18 professional interpreters in a primary care setting; this example drew on team members' own  
19 experiences of working with interpreters. Although this was designed to focus the discussion on  
20 issues relating to coherence and cognitive participation, issues relating to collective action and  
21 reflexive monitoring also arose (see Results).  
22  
23  
24  
25  
26  
27

28 By month 20, when the next face-to-face training took place, the in-country teams were preparing to  
29 commence fieldwork with their stakeholders (Stage 2 of RESTORE). Teams were given another  
30 opportunity to participate in an interactive role play. For this, a G/TI selected by one of the in-  
31 country RESTORE teams in collaboration with their stakeholders was used; some members of the  
32 RESTORE team were asked to role play the kind of discussions they might encounter in their  
33 fieldwork. The issues and questions that arose during this were recorded and mapped to the four  
34 NPT constructs by the other team members, using large wall charts and stickie notelets. The  
35 resultant mapping was then reviewed by the NPT trainers and discussed by the group.  
36  
37  
38  
39  
40  
41  
42  
43  
44  
45  
46  
47  
48

49 ***Later training sessions (Months 25 to 40).***  
50

51 By month 25, teams were conducting fieldwork and moving into Stage 3, where the chosen G/TI  
52 would be fully adapted, implemented and the result of that implementation monitored. (This  
53 process and the results are reported in two recent RESTORE project papers.<sup>41 48</sup>) Teams were now  
54  
55  
56  
57  
58  
59  
60

1  
2  
3 generating qualitative data about that process, which required the development of a coding  
4  
5 framework broadly applicable across all the participating sites. Thus, training focused both on the  
6  
7 constructs of collective action and reflexive monitoring and on the process of analysis.  
8  
9

10 To begin training in analysis, an anonymised extract of data generated from RESTORE fieldwork in  
11  
12 Ireland was selected. This was pre-circulated to the teams for coding to the four constructs and, if  
13  
14 possible, to the sub-constructs. In addition to team coding, the extract was sent to the trainers and  
15  
16 to three recognised external experts in NPT. Coded data were collated and presented at the  
17  
18 Consortium training at Month 25.  
19

20  
21 Training sessions at Months 38 and 43 continued to focus on analysis. Teams were asked to review  
22  
23 extracts of data or to bring examples of coding dilemmas with them. Coding dilemmas included  
24  
25 examples of data that researchers were concerned were being miscoded; data that did not appear  
26  
27 to fit into the NPT framework; and data that appeared to be particular to only one site. Evaluation at  
28  
29 the end of these later sessions allowed the NPT trainers to clarify the team's understanding of the  
30  
31 coding process and to address any on-going concerns through teleconferences or email.  
32  
33  
34  
35  
36

### 37 **Non face-to-face support**

38  
39 Several mechanisms were put into place to support teams in-between face-to-face sessions,  
40  
41 including buddy groups (linking teams experienced in theory use with less experienced teams);  
42  
43 telephone and video conferences; email feedback on issues and problems. Later in the project,  
44  
45 telephone and video conferences were also used to support data analysis, promoting consistency in  
46  
47 the application of theory to analysis across the participating countries.  
48  
49

50  
51 Outside the formal training sessions, we uploaded NPT relevant information such as key papers and  
52  
53 links to the NPT Toolkit website ([www.normalizationprocess.org](http://www.normalizationprocess.org)) to a shared folder accessible by all  
54  
55 the research team to serve as a resource whenever required.  
56  
57  
58  
59  
60

### **Evaluation of the NPT training content**

Face-to-face training was evaluated qualitatively at the end of each training day. Everyone present at the training days (generally all 18 members of the research team) participated in each evaluation; no one refused to participate. Methods included: written lists of the 3 most positive and 3 most negative features of the training; speed evaluation where each participant was given two minutes to verbally record which aspects of training had, or had not, been effective for them; scoring elements of the training on a Likert scale (e.g. from 1 = very poor to 5 = very good). These data were collected either as short written comments or recorded on a digital recorder. Additional evaluation was conducted approximately three weeks after the first session, when the team were emailed a short set of questions asking what had worked well; what had not worked well; and what they wanted from future training sessions. All the evaluation feedback was reviewed by the four members of the training team and the findings summarised into 'what worked', 'what didn't work' and 'what the team would like to do next'. The results of the evaluations were then summarised and presented back to the full team at the next face-to-face RESTORE Consortium meeting, providing the team with a further opportunity to comment on whether they believed all the key issues or suggestions regarding training had been captured and addressed.

### **Results**

#### ***Early project training (Months 1 to 12).***

Team evaluation indicated that the content of the first training sessions (Sessions 1 and 2, Supplementary File 2) was too didactic and prescriptive. The team felt overwhelmed trying to assimilate general knowledge about the application of theory to research along with NPT-specific information. The early use of the 16 NPT sensitising questions (Table 1) was not well liked by some researchers used to more inductive methods of working in qualitative projects. Others, particularly



1  
2  
3 the clinicians, found this approach helpful as they tried to develop their understanding of the  
4  
5 theory's different constructs.  
6

7  
8 *The 16 questions of the [NPT] toolkit gave us a better insight into what was meant by terms*  
9  
10 *like 'sense-making' 'participation' 'action' and 'monitoring'. (Buddy report from Dutch and*  
11  
12 *English teams).*  
13

### 14 15 16 17 **Mid-project training (Months 13 to 24).** 18

19  
20 As a result of team feedback on the didactic nature of the first sessions, the NPT trainers adopted a  
21  
22 more PLA-focused style for the mid-project training sessions. This also reflected the methodological  
23  
24 approach of the RESTORE project in the field, as described elsewhere.<sup>27 31</sup> Consequently, later  
25  
26 sessions had one or at most two short didactic presentations, with the remaining time spent on  
27  
28 participatory exercises. The mid-project training content was aligned more closely to the temporal  
29  
30 arrangement of the project itself and linked to the over-arching constructs of NPT. Thus, we focused  
31  
32 principally on sense-making (coherence) and engagement work (cognitive participation) first, before  
33  
34 turning to the actual work undertaken (collective action) and, finally, monitoring and appraisal work  
35  
36 (reflexive monitoring) (Figure 2).  
37

38  
39  
40 The use of a 'light' humorous exercise, the circus tent (Figure 3), where the team could concentrate  
41  
42 on the content of the theory without worrying about how it applied to future fieldwork evaluated  
43  
44 well. Exercises using practical examples grounded in the fieldwork they would have to conduct  
45  
46 during the course of the project were also helpful.  
47

48  
49 *Exercises helped a lot! Very comfortable now! (Anonymous response in written evaluation*  
50  
51 *feedback)*

52  
53 *Worked well. I'm beginning to see sense. The use of PLA methods/ techniques really helps*  
54  
55 *grasping NPT and made it digestible! (Anonymous response in written evaluation feedback)*  
56  
57  
58  
59  
60

1  
2  
3 Interactive exercises and role play designed to focus on coherence and cognitive participation also  
4  
5 spontaneously picked up issues relating to collective action (who would actually do the work; how  
6  
7 would it be funded) and reflexive monitoring (how would teams know if professional interpreters  
8  
9 had an impact). This served as an important reminder that, even when NPT sensitising questions  
10  
11 from researchers were designed to focus on sense-making and engagement, other issues would  
12  
13 naturally emerge in the discussion, emphasising the lack of linearity in the application of theory to  
14  
15 data generation. This was reflected in feedback obtained from two of the in-country teams.  
16

17  
18 *Coherence and cognitive participation refer, in the main, to processes before any*  
19  
20 *implementation work has occurred. However, we did note that the theory is fluid and not fixed*  
21  
22 *or linear, so this means that the experience of doing the implementation work (collective*  
23  
24 *action) and reflecting on that work (reflexive monitoring) could influence coherence and*  
25  
26 *cognitive participation over time..... An 'aha!' moment occurred when we distilled the thinking*  
27  
28 *in the group around the difference between cognitive participation and collective action as*  
29  
30 *'thinking about the doing' and 'doing the doing' (Buddy Report from Greek and Irish teams).*  
31  
32

### 33 34 35 36 37 **Later training sessions (Months 25 to 40).**

38  
39 Training conducted later in the project steadily moved from using theory to inform the collection of  
40  
41 data in the field to using theory to underpin analysis of data. Face-to-face training session at Months  
42  
43 25 and 31 focused mainly on coding data extracts and on round-table discussion of the approach  
44  
45 being taken. Prior to meeting at month 25, teams received an extract of data generated by the Irish  
46  
47 team (Box 2); teams were asked to code this to the main constructs and, if possible, sub-constructs  
48  
49 of NPT. Coding was then compared at the training session in Month 25.  
50  
51  
52  
53  
54  
55  
56  
57  
58  
59  
60

**Box 2. Background to data generation by Irish team.**

MORdeB and TdeB developed training materials to support the RESTORE researchers use the methods of PLA in their fieldwork. One of these was a DVD in which researchers in Ireland role-played a discussion amongst health care professionals, policy makers, migrants' representatives and interpreters about the implementation of a training initiative to support the use of trained interpreters in primary care consultations in Ireland. Researchers were assigned these roles; the facilitator was one of RESTORE's PLA experts. The role play was filmed and the dialogue transcribed to allow teams to review and develop experience in applying NPT to coding data. This PLA training will be described more fully in future publications.

Table 2 shows examples of coding from two of the in-country teams, along with the final coding agreed by the whole RESTORE team. The first coding extract was selected because the data focused mainly on the construct of coherence, i.e. developing an understanding of the rationale for using interpreters in practice and the benefits of that. Overall, there was a high level of agreement between the team in their data coding, particularly when coding to the high-level constructs of NPT. Each in-country team showed a good degree of consistency in coding to the construct of Coherence, with some coding in particular to the sub-constructs of Differentiation ('seeing interpreters as a new way of working') and Internalisation ('articulating the benefits of working with interpreters'). The Dutch team also coded this portion of transcript to the construct Cognitive Participation, suggesting that the conversation was also discussing the need to enrol others into working with interpreters (Table 2). Face-to-face discussion at Month 25 led to a shared understanding and agreement that – where data was referring to both understanding the use of interpreters *and* considering who should be involved – then it was appropriate to double code data to both Coherence and Cognitive Participation. Likewise, where resources were referred to, for example the provision of training and DVD materials, text could be coded to Collective Action (Contextual Integration). Such discussions both helped the team refine their understanding of NPT, but also resulted in a robust coding framework which could be used across all country teams.

1  
2  
3 This process continued at later training meetings, at months 31 and 38 supplemented by telephone  
4  
5 and video conferences, where coding of data was compared and differences in interpretation  
6  
7 discussed. To facilitate this process, each country team nominated one person to lead on coding  
8  
9 qualitative data generated in that country, who then worked with the leads in the other countries to  
10  
11 review and discuss coding. Examples of coding were discussed and memos relating to data coding  
12  
13 circulated across the team, ensuring consistency of meaning and interpretation in relation to coding  
14  
15 data. The final coding frame was then reviewed and discussed at a final training meeting involving all  
16  
17 members of the RESTORE team which took place at month 43.  
18  
19  
20  
21  
22  
23  
24  
25  
26  
27  
28  
29  
30  
31  
32  
33  
34  
35  
36  
37  
38  
39  
40  
41  
42  
43  
44  
45  
46  
47  
48  
49  
50  
51  
52  
53  
54  
55  
56  
57  
58  
59  
60

Table 2. Coding example from a transcript: coding by in-country team and final coding after discussion

| Speaker                        | Text                                                                                                                                                                                                                                                                                                                                                                                                          | NPT Coding                                                                                                                                                                                          |
|--------------------------------|---------------------------------------------------------------------------------------------------------------------------------------------------------------------------------------------------------------------------------------------------------------------------------------------------------------------------------------------------------------------------------------------------------------|-----------------------------------------------------------------------------------------------------------------------------------------------------------------------------------------------------|
| <b>Coding from Irish Team.</b> |                                                                                                                                                                                                                                                                                                                                                                                                               |                                                                                                                                                                                                     |
| Facilitator                    | So when we began this, this morning [name] as the policy person you made a very interesting comment and you started the whole ball rolling with this didn't you?                                                                                                                                                                                                                                              |                                                                                                                                                                                                     |
| Policy maker*                  | Yeah, I suppose just reflecting on where we are at, at the moment within the health organisation is that we have a ban on travel and there's an embargo on education and <u>training initiatives</u> .                                                                                                                                                                                                        | Coded this text to <b>Coherence (Internalisation)</b> – understands the initiative; sees benefit in it.                                                                                             |
|                                | So something like this that provides a DVD, training and guidance is a major plus. It's something that's really going to tick the boxes for us whilst be very meaningful for front line staff as well                                                                                                                                                                                                         | Underlined text double coded to <b>Collective Action (Contextual Integration)</b> due to mention of training.                                                                                       |
| Facilitator                    | Okay so it's got two real advantages there, it's going to get over the problem you have about not being able to travel, not being able to go out and do the capacity building and training because it hands it to you right on the plate, as you see it. And also it's going to be very meaningful for front line staff, and if I remember [name] you found that interesting. You had a comment about that... |                                                                                                                                                                                                     |
| GP*                            | Yeah I think this was mine here, so as a GP I really liked the fact that there was a resource available to me as a front line member of staff, <u>a resource available to me which answers a lot of the questions that I have about using interpreters in my practice and how that might work.</u> So I found that very helpful.                                                                              | Coded text to <b>Coherence (Internalisation)</b> – sees benefit in this initiative.<br>Underlined text double coded to <b>Coherence (Differentiation)</b> as this seems to be a new way of working. |
| Facilitator                    | So that's a real positive for you about this particular training initiative. Okay and who else has comments here that they'd like to read out to us and remind us about? There's quite a few here.                                                                                                                                                                                                            |                                                                                                                                                                                                     |

|    |                               |                                                                                                |                                             |
|----|-------------------------------|------------------------------------------------------------------------------------------------|---------------------------------------------|
| 1  |                               |                                                                                                |                                             |
| 2  |                               |                                                                                                |                                             |
| 3  |                               |                                                                                                |                                             |
| 4  |                               |                                                                                                |                                             |
| 5  | Interpreter*                  | Yeah I think that one there [name] that you pointed to is my one and as an interpreter         | Text coded to Coherence –                   |
| 6  |                               | I felt that this package was particularly relevant because it gives special attention to       | understands initiative and sees             |
| 7  |                               | the Irish context and I feel that that's very important for me in my role as an                | benefit of it.                              |
| 8  |                               | interpreter. <u>And that you know for interpreters working in Ireland that its just very</u>   | Underlined text double coded to             |
| 9  |                               | <u>useful, I don't think this has been done before.</u>                                        | <b>Coherence (Differentiation)</b> as this  |
| 10 |                               |                                                                                                | seems to be a new way of working.           |
| 11 |                               |                                                                                                |                                             |
| 12 |                               |                                                                                                |                                             |
| 13 |                               |                                                                                                |                                             |
| 14 | <b>Coding from Dutch Team</b> |                                                                                                |                                             |
| 15 | Facilitator                   | So when we began this, this morning [name] as the policy person you made a very                |                                             |
| 16 |                               | interesting comment and you started the whole ball rolling with this didn't you?               |                                             |
| 17 |                               |                                                                                                |                                             |
| 18 | Policy maker*                 | Yeah, I suppose just reflecting on where we are at, at the moment within the health            | Text coded to <b>Coherence</b> .            |
| 19 |                               | organisation is that we have a ban on travel and there's an embargo on education and           | Underlined text double coded to             |
| 20 |                               | training initiatives.                                                                          | <b>Cognitive Participation</b> , as need to |
| 21 |                               | So something like this that provides a DVD, training and guidance is a major plus. <u>It's</u> | engage frontline staff.                     |
| 22 |                               | <u>something that's really going to tick the boxes for us whilst be very meaningful for</u>    |                                             |
| 23 |                               | <u>front line staff as well</u>                                                                |                                             |
| 24 |                               |                                                                                                |                                             |
| 25 | Facilitator                   | Okay so it's got two real advantages there, it's going to get over the problem you have        |                                             |
| 26 |                               | about not being able to travel, not being able to go out and do the capacity building          |                                             |
| 27 |                               | and training because it hands it to you right on the plate, as you see it. And also it's       |                                             |
| 28 |                               | going to be very meaningful for front line staff, and if I remember [name] you found           |                                             |
| 29 |                               | that interesting. You had a comment about that...                                              |                                             |
| 30 |                               |                                                                                                |                                             |
| 31 | GP*                           | Yeah I think this was mine here, so as a GP I really liked the fact that there was a           | Text coded to <b>Cognitive</b>              |
| 32 |                               | resource available to me as a front line member of staff, a resource available to me           | <b>Participation</b> as this was            |
| 33 |                               | which answers a lot of the questions that I have about using interpreters in my                | interpreted by Dutch team as                |
| 34 |                               | practice and how that might work. So I found that very helpful.                                | focusing on the individual's                |
| 35 |                               |                                                                                                | willingness to engage with                  |
| 36 |                               |                                                                                                | interpreters.                               |
| 37 |                               |                                                                                                |                                             |
| 38 | Facilitator                   | So that's a real positive for you about this particular training initiative. Okay and who      |                                             |
| 39 |                               | else has comments here that they'd like to read out to us and remind us about?                 |                                             |
| 40 |                               | There's quite a few here.                                                                      |                                             |
| 41 |                               |                                                                                                |                                             |
| 42 |                               |                                                                                                |                                             |
| 43 |                               |                                                                                                |                                             |
| 44 |                               |                                                                                                |                                             |
| 45 |                               |                                                                                                |                                             |
| 46 |                               |                                                                                                |                                             |
| 47 |                               |                                                                                                |                                             |
| 48 |                               |                                                                                                |                                             |
| 49 |                               |                                                                                                |                                             |

1  
2  
3  
4  
5  
6  
7  
8  
9  
10  
11  
12  
13  
14  
15  
16  
17  
18  
19  
20  
21  
22  
23  
24  
25  
26  
27  
28  
29  
30  
31  
32  
33  
34  
35  
36  
37  
38  
39  
40  
41  
42  
43  
44  
45  
46  
47  
48  
49

Interpreter\*

Yeah I think that one there [name] that you pointed to is my one and as an interpreter I felt that this package was particularly relevant because it gives special attention to the Irish context and I feel that that's very important for me in my role as an interpreter. And that you know for interpreters working in Ireland that its just very useful, I don't think this has been done before.

First part coded to **Coherence** – focused on understanding and a new way of working.

Underlined text double coded to **Cognitive Participation** – focused on buy-in and engagement with interpreters.

#### Final coding after face-to-face discussion

Facilitator

So when we began this, this morning [name] as the policy person you made a very interesting comment and you started the whole ball rolling with this didn't you?

Policy maker\*

Yeah, I suppose just reflecting on where we are at, at the moment within the health organisation is that we have a ban on travel and there's an embargo on education and training initiatives.

Text coded to **Coherence** – trying to make sense of the training initiative; what makes it a new way or working.

So something like this that provides a DVD, training and guidance is a major plus. It's something that's really going to tick the boxes for us whilst be very meaningful for front line staff as well

Text coded to **Collective Action (Contextual Integration)** – refers to what is involved and the resources provided (DVD, training and guidance).

Underlined text double coded to **cognitive participation** – consideration of other groups that need to be engaged with

Facilitator

Okay so it's got two real advantages there, it's going to get over the problem you have about not being able to travel, not being able to go out and do the capacity building and training because it hands it to you right on the plate, as you see it. And also it's going to be very meaningful for front line staff, and if I remember [name] you found that interesting. You had a comment about that...

GP\*

Yeah I think this was mine here, so as a GP I really liked the fact that there was a resource available to me as a front line member of staff, a resource available to me

Text coded to **Coherence** – reflects that this is a new way of working

1  
2  
3  
4  
5  
6  
7  
8  
9  
10  
11  
12  
13  
14  
15  
16  
17  
18  
19  
20  
21  
22  
23  
24  
25  
26  
27  
28  
29  
30  
31  
32  
33  
34  
35  
36  
37  
38  
39  
40  
41  
42  
43  
44  
45  
46  
47  
48  
49

which answers a lot of the questions that I have about using interpreters in my practice and how that might work. So I found that very helpful.

**(Differentiation)**; recognises the benefits **(Internalisation)**.

Facilitator

So that's a real positive for you about this particular training initiative. Okay and who else has comments here that they'd like to read out to us and remind us about? There's quite a few here.

Interpreter\*

Yeah I think that one there [name] that you pointed to is my one and as an interpreter I felt that this package was particularly relevant because it gives special attention to the Irish context and I feel that that's very important for me in my role as an interpreter. And that you know for interpreters working in Ireland that its just very useful, I don't think this has been done before.

Text coded to **Coherence (Differentiation)** – seen as a new way of working.  
Text underlined double coded to **Collective Action (Contextual Integration)** – this refers to Irish context.

---



## Challenges

On-going telephone and email contact ensured that difficulties and tensions were quickly surfaced, particularly when theory was being applied to fieldwork. Training at month 20 began with an intensive de-briefing, where in-country teams were encouraged to freely discuss their concerns and challenges arising from using NPT. These focused on two, related, concerns. There was a continued lack of confidence in their knowledge of NPT itself and of being able to correctly map issues and data generated in the field to the NPT constructs. However, the use of visual methods of collecting and displaying data generated during the interactive group exercises, as exemplified in PLA approaches,<sup>31</sup> meant that the trainers could quickly identify a high degree of fidelity in the assignment of data to NPT constructs, thus reassuring the team of their knowledge development (Figure 4).

INSERT FIGURE 4 HERE

The second major issue reflected the disciplinary and epistemological differences within the research team. Some researchers were used to policy-related research, where the application of theory to data and the use of approaches such as Framework Analysis<sup>49</sup> were familiar. Others came from a sociological or anthropological background and were more comfortable with an inductive data-driven approach to analysis. This led to understandable concerns that data might be 'flattened' and shoe-horned into the NPT framework. To alleviate this concern, the trainers paid particular attention to the identification and recognition of coding which lay outside the NPT constructs, for example in relation to power dynamics between different stakeholders. A final concern was whether construct application and data generation, in the field, was linear or whether there were 'feedback loops'. For example, the research team considered the question of whether engaging in the work of implementing a G/TI could increase participants understanding or 'coherence' in relation to that G/TI? Training, therefore, continuously emphasised the lack of linearity in the process of applying theory to both data collection and analysis and encouraged the researchers to think through how this would affect data collection in the field.

## Discussion

### *Principal findings and their relation to other work*

We have described our approach to applying a mid-level sociological theory – Normalisation Process Theory – to a multi-site cross-country research study, RESTORE. In our endeavour to use NPT to shape our overall implementation journey, including data collection as well as analysis, we had to develop iterative and flexible training to support our multi-disciplinary, cross-national project team. While this presented challenges, we believe it also strengthened and added value to our work, ensuring it was designed, implemented and analysed in a robust and consistent manner across all five countries in which empirical data collection was conducted.

A multi-disciplinary, multi-national team inevitably has differences in terms of understanding the process of qualitative research and the use of theory. Professional and cultural perspectives impact on both individual and collective comfort (both in terms of country and professional discipline) with the concept of using theory to inform the design and conduct of a largely qualitative, implementation study. For example, researchers used to a more inductive approach to data analysis were initially cautious of an approach that applied theory to data analysis. The design of a robust programme of training, which acknowledged and discussed these perspectives during the course of the training, was challenging but also allowed the team to reach a shared understanding of what the study was trying to achieve. The benefits of surfacing these tensions became apparent as the training moved to the process of data analysis.

From our experience of developing training for using NPT, we have developed a series of generic recommendations that can be applied to other studies seeking to use theory in health services research (Table 3).

**Table 3. Recommendations for the future development of training to support the use of theory in health services research**

|                                                                                                                                               |
|-----------------------------------------------------------------------------------------------------------------------------------------------|
| 1. The application of theory to study design and fieldwork is not linear and training must acknowledge this                                   |
| 2. Experiential learning and the use of interactive, participatory and visual approaches are an important learning device.                    |
| 3. Training can be most effective when it focuses on the high level constructs of a theory.                                                   |
| 4. Different disciplinary backgrounds must be acknowledged and welcomed.                                                                      |
| 5. Space is required in the training programme to acknowledge and address researcher concerns.                                                |
| 6. Training in the application of theory can support the development and robustness of qualitative coding, especially for multi-site studies. |

A key recommendation is to acknowledge, from the beginning of training, that theory is not linear or sequential. This is often a challenge when applying theory to fieldwork; for example, Michie and colleagues have developed their Behaviour Change model as a wheel, in order to address any pre-conceived conceptions of 'linearity'.<sup>50</sup> The model of candidacy has also been criticised for an apparent linearity that is not found when applied in the field.<sup>51 52</sup> The nature and speed of fieldwork means it is important for researchers to be familiar with all constructs of a selected theory, in order to fully appreciate the theoretical relevance of the data as it is generated. Thus, training needs to both acknowledge and affirm the complexities of temporal order in prospective fieldwork and ensure that researchers are familiar with all the components of a theory early enough in the research study to ensure confidence when moving into fieldwork.

Team learning and understanding develops more rapidly and deeply by using participatory and experiential approaches to learning.<sup>31</sup> In our work, interactive exercises with visual methods of collecting data, role play and non-specific 'light' examples were all effective approaches to supporting learning and understanding. We strongly recommend this approach in the development of training for any complex theory that requires new users to develop an understanding of a range of

1  
2  
3 components. The second advantage of using multiple interactive exercises is as a means to check on  
4  
5 research team's 'theoretical fidelity' when analysing the data generated in the field.  
6

7  
8 Theoretical frameworks are often complex, with constructs which can themselves be broken down  
9  
10 to ever smaller sub-constructs. This level of complexity can be daunting for researchers new to the  
11  
12 theory being used and can lead to difficulties when coding data. Our experience suggests that a  
13  
14 focus on the high level constructs of a theory works best in the early stages of training. Once teams  
15  
16 have grasped and understood those, they can intuitively develop a deeper understanding of the  
17  
18 underlying sub-components.  
19

20  
21 Throughout our training programme, we allowed ample time for concerns to be raised and discussed  
22  
23 and for the team to develop solutions. An advantage of the time spent of training was apparent,  
24  
25 however, later in the project as we moved onto coding the qualitative data generated across  
26  
27 multiple sites. By then, the time spent in early training ensured that the team had a much clearer  
28  
29 and consistent view of the constructs and their meaning, leading to a consistency and robustness in  
30  
31 coding and analysis.  
32  
33

### 34 35 36 37 **Conclusion**

38  
39 Overall, we found the prospective application of NPT to our work to be invaluable but, at times,  
40  
41 challenging. We believe that these issues were not unique to the use of NPT, but could arise with the  
42  
43 use of other theories, especially in large multi-site and cross-country projects. The development of a  
44  
45 complementary package of training to support the use of our chosen theory ensured that our work  
46  
47 was consistently and robustly informed by theory at all stages of the project, from design through  
48  
49 data collection to analysis. This approach can, and should, be adopted by future research teams  
50  
51 carrying out theoretically-informed implementation studies.  
52  
53  
54  
55  
56  
57  
58  
59  
60

### Competing interests

The authors declare that there are no competing interests.

### Authors contributions

All authors (COD, FM, CD, MO'RdeB, TdeB, NB, CL, AS, MP, MvdM, EvWB, KG, LC, CP, ET, FvdDM, MV, WS, AMcF) made substantial contributions to the design and development of RESTORE and its training programme, to the collection of data or to the analysis and interpretation of the data. Training materials were developed by COD, FM, CD and AMcF, with input from MO'RdeB and TdeB. COD wrote the first draft of the paper and led substantive re-drafting, supported by FM, CD and AMcF; all authors listed above were involved in revising and commenting on later drafts of the manuscript. All authors have given their final approval to this version.

### Acknowledgements

Some of this work was presented at a workshop at the North American Primary Care Research Group Meeting in November 2014 and we thank the participants for their helpful comments; we also thank Professor Carl May, University of Southampton for his support and helpful discussions. We also thank our reviewers, whose insightful comments have enhanced the clarity and order of this paper.

### Consent to use data

Ethical approval to use data generated during training was obtained from the National University of Ireland, Galway. All members of the RESTORE team agreed to their evaluation comments being used in this paper.

**Funding**

RESTORE was funded by the European Union's FP7 Health Programme, contract number 257258.

The funder has not contributed to the views expressed in this paper.

**Data Sharing**

No additional data available. Training materials are available as described in the Supplementary Files.

For peer review only

## References

1. Woolf SH. The meaning of translational research and why it matters. *JAMA* 2008;299(2):211-13.
2. Pronovost PJ, Goeschel CA. Time to take health delivery research seriously. *JAMA* 2011;306(3):310-11.
3. Eccles MP, Armstrong D, Baker R, et al. An implementation research agenda. *Implementation Science* 2009;4(1):18.
4. Greenhalgh T, Robert G, Macfarlane F, et al. Diffusion of innovations in service organizations: Systematic review and recommendations. *Milbank Quarterly* 2004;82(4):581-629.
5. The Improved Clinical Effectiveness through Behavioural Research Group (ICEBeRG). Designing theoretically-informed implementation interventions. *Implementation Science* 2006;1(1):4.
6. Davidoff F, Dixon-Woods M, Leviton L, et al. Demystifying theory and its use in improvement. *BMJ Quality & Safety* 2015 doi: 10.1136/bmjqs-2014-003627
7. Sales A, Smith J, Curran G, et al. Models, strategies, and tools. Theory in implementing evidence-based findings into health care practice. *Journal of General Internal Medicine* 2006;21(2):S43-S49. doi: 10.1007/s11606-006-0274-x
8. Forster D, Newton M, McLachlan H, et al. Exploring implementation and sustainability of models of care: can theory help? *BMC Public Health* 2011;11(Suppl 5):S8.
9. Craig P, Dieppe P, Macintyre S, et al. Developing and evaluating complex interventions: The new Medical Research Council guidance. *International Journal of Nursing Studies* 2013;50(5):587-92.
10. Davies P, Walker A, Grimshaw J. A systematic review of the use of theory in the design of guideline dissemination and implementation strategies and interpretation of the results of rigorous evaluations. *Implementation Science* 2010;5(1):14.
11. Colquhoun HL, Brehaut JC, Sales A, et al. A systematic review of the use of theory in randomized controlled trials of audit and feedback. *Implementation Science* 2013;8(1):66.
12. McDonald KM, Graham ID, Grimshaw J. Toward a theoretic basis for quality improvement interventions. In: Shojania KG, McDonald KM, Wachter RM, et al., eds. Closing the quality gap: A

- 1  
2  
3 critical analysis of quality improvement strategies Rockville, MD: Agency for Healthcare Research  
4 and Quality 2004:27-40.  
5  
6  
7 13. Nilsen P. Making sense of implementation theories, models and frameworks. *Implementation*  
8  
9 *Science* 2015;10(1):53.  
10  
11 14. Weiss CH. Nothing as practical as a good theory: Exploring theory-based evaluation for  
12 comprehensive community-based initiatives for children and families. In: Connell JP, Kubisch AC,  
13 Schorr LB, et al., eds. *New approaches to evaluating community initiatives, Vol 1 Concepts, methods*  
14 *and contexts*. Washington DC: Aspen Institute 1995.  
15  
16  
17 15. Tabak RG, Khoong EC, Chambers DA, et al. Bridging research and practice: Models for  
18 dissemination and implementation research. *American Journal of Preventive Medicine*  
19  
20 2012;43(3):337-50.  
21  
22  
23 16. Grol RPTM, Bosch MC, Hulscher MEJL, et al. Planning and studying improvement in patient care:  
24 The use of theoretical perspectives. *The Milbank Quarterly* 2007;85(1):93-138.  
25  
26  
27 17. Wyke S, Adamson J, Dixon D, et al. Consultation and illness behaviour in response to symptoms:  
28 A comparison of models from different disciplinary frameworks and suggestions for future research  
29 directions. *Social Science & Medicine* 2013;86(0):79-87.  
30  
31  
32 18. Ullrich PM, Sahay A, Stetler CB. Use of implementation theory: A focus on PARIHS. *Worldviews*  
33 *on Evidence-Based Nursing* 2014;11(1):26-34. doi: 10.1111/wvn.12016  
34  
35  
36 19. Glasgow RE, Vogt TM, Boles SM. Evaluating the public health impact of health promotion  
37 interventions: the RE-AIM framework. *Am J Public Health* 1999;89(9):1322-27.  
38  
39  
40 20. Gaglio B, Shoup JA, Glasgow RE. The RE-AIM framework: A systematic review of use over time.  
41 *American Journal of Public Health* 2013;103(6):e38-e46. doi: 10.2105/AJPH.2013.301299  
42  
43  
44 21. Kitson AL, Rycroft-Malone J, Harvey G, et al. Evaluating the successful implementation of  
45 evidence into practice using the PARIHS framework: theoretical and practical challenges.  
46  
47  
48 *Implementation Science* 2008;3(1):1.  
49  
50  
51  
52  
53  
54  
55  
56  
57  
58  
59  
60



- 1  
2  
3 22. Helfrich CD, Damschroder LJ, Hagedorn HJ, et al. A critical synthesis of literature on the  
4 promoting action on research implementation in health services (PARIHS) framework.  
5  
6  
7 *Implementation Science* 2010;5(1):82. doi: 10.1186/1748-5908-5-82  
8  
9  
10 23. Field B, Booth A, Ilott I, et al. Using the Knowledge to Action Framework in practice: a citation  
11 analysis and systematic review. *Implementation Science* 2014;9(1):172.  
12  
13  
14 24. McEvoy R, Ballini L, Maltoni S, et al. A qualitative systematic review of studies using the  
15 normalization process theory to research implementation processes. *Implementation Science*  
16  
17 2014;9(1):2.  
18  
19  
20 25. Crosby R, Noar SM. Theory development in health promotion: are we there yet? *J Behav Med*  
21  
22 2010;33(4):259-63. doi: 10.1007/s10865-010-9260-1  
23  
24  
25 26. Benzer J, Beehler S, Cramer I, et al. Between and within-site variation in qualitative  
26 implementation research. *Implementation Science* 2013;8(1):4. doi: 10.1186/1748-5908-8-4  
27  
28  
29 27. MacFarlane A, O'Donnell C, Mair F, et al. REsearch into implementation STRategies to support  
30 patients of different ORigins and language background in a variety of European primary care settings  
31 (RESTORE): study protocol. *Implementation Science* 2012;7:111.  
32  
33  
34 28. MacFarlane A, O'Reilly-de Brún M, de Brún T, et al. Healthcare for migrants, participatory health  
35 research and implementation science—better health policy and practice through inclusion. The  
36 RESTORE project. *European Journal of General Practice* 2014:1-5. doi:  
37  
38 10.3109/13814788.2013.868432  
39  
40  
41 29. O'Donnell CA, Burns N, Mair FS, et al. Reducing the health care burden for marginalised migrants:  
42 The potential role for primary care in Europe. *Health Policy* 2016 doi:  
43  
44 10.1016/j.healthpol.2016.03.012  
45  
46  
47  
48  
49 30. O'Reilly-de Brún M, MacFarlane A, de Brún T, et al. Involving migrants in the development of  
50 guidelines for communication in cross-cultural general practice consultations: a participatory  
51 learning and action research project. *BMJ Open* 2015;5(9) doi: 10.1136/bmjopen-2014-007092  
52  
53  
54  
55  
56  
57  
58  
59  
60

- 1  
2  
3 31. de Brún T, O'Reilly-de Brún M, O'Donnell CA, et al. Learning from doing: the case for combining  
4  
5 normalisation process theory and participatory learning and action research methodology for  
6  
7 primary healthcare implementation research. *BMC Health Services Research* 2016;16:346. doi:  
8  
9 10.1186/s12913-016-1587-z  
10  
11 32. May C, Finch T. Implementing, embedding, and integrating practices: An outline of Normalization  
12  
13 Process Theory. *Sociology* 2009;43(3):535-54.  
14  
15 33. May CR, Mair F, Finch T, et al. Development of a theory of implementation and integration:  
16  
17 Normalization Process Theory. *Implementation Science* 2009;4(1):29.  
18  
19 34. Bamford C, Heaven B, May C, et al. Implementing nutrition guidelines for older people in  
20  
21 residential care homes: a qualitative study using Normalization Process Theory. *Implementation*  
22  
23 *Science* 2012;7(1):106.  
24  
25 35. May CR, Sibley A, Hunt K. The nursing work of hospital-based clinical practice guideline  
26  
27 implementation: An explanatory systematic review using Normalisation Process Theory.  
28  
29 *International Journal of Nursing Studies* 2014;51(2):289-99.  
30  
31 36. Gallacher K, May CR, Montori VM, et al. Understanding patients' experiences of treatment  
32  
33 burden in chronic heart failure using Normalization Process Theory. *Annals of Family Medicine*  
34  
35 2011;9(3):235-43.  
36  
37 37. Gallacher K, Morrison D, Jani B, et al. Uncovering treatment burden as a key concept for stroke  
38  
39 care: A systematic review of qualitative research. *PLoS Med* 2013;10(6):e1001473. doi:  
40  
41 doi:10.1371/journal.pmed.1001473  
42  
43 38. Jani B, Blane D, Browne S, et al. Identifying treatment burden as an important concept for end of  
44  
45 life care in those with advanced heart failure. *Current Opinion in Supportive Palliative Care*  
46  
47 2013;7(1):3-7. doi: doi:"10.1097/SPC.0b013e32835c071f"  
48  
49 39. Murray E, Treweek S, Pope C, et al. Normalisation process theory: a framework for developing,  
50  
51 evaluating and implementing complex interventions. *BMC Medicine* 2010;8(1):63.  
52  
53  
54  
55  
56  
57  
58  
59  
60

- 1  
2  
3 40. de Brún T, O'Reilly de-Brún M, van Weel-Baumgarten E, et al. Guidelines and training initiatives  
4 that support communication in cross-cultural primary-care settings: appraising their  
5  
6  
7 implementability using Normalization Process Theory. *Family Practice* 2015;32(4):420-25. doi:  
8  
9 10.1093/fampra/cmz022  
10  
11 41. Lionis C, Papadakaki M, Saridaki A, et al. Engaging migrants and other stakeholders to improve  
12 communication in cross-cultural consultation in primary care: a theoretically informed participatory  
13  
14 study. *BMJ Open* 2016;6:e010822. doi: 10.1136/bmjopen-2015-010822  
15  
16  
17 42. May C, Finch T, Mair F, et al. Understanding the implementation of complex interventions in  
18 health care: the normalization process model. *BMC Health Services Research* 2007;7:148.  
19  
20  
21 43. May C, Mair F, Dowrick C, et al. Process evaluation for complex interventions in primary care:  
22 understanding trials using the normalization process model. *BMC Family Practice* 2007;8(1):42.  
23  
24  
25 44. May CR. Assessing and evaluating complex interventions for chronic disease management: The  
26  
27 nomalization process model, 2006.  
28  
29  
30 45. Gunn JM, Palmer VJ, Dowrick CF, et al. Embedding effective depression care: using theory for  
31 primary care organisational and systems change. . *Implementation Science* 2010;5:62.  
32  
33  
34 46. McEvoy R, MacFarlane A. Community participation in primary care in Ireland: the need for  
35  
36 implementation research. *Primary Health Care Research & Development* 2013;14(2):126-39.  
37  
38  
39 47. Devlin AM, McGee-Lennon M, O'Donnell CA, et al. Delivering digital health and well-being at  
40 scale: Lessons learned during the implementation of the dallas program in the United Kingdom.  
41  
42  
43 *Journal of the American Medical Informatics Association* 2016;23:48-59. doi: 10.1093/jamia/ocv097  
44  
45  
46 48. Teunissen E, Gravenhorst K, Dowrick C, et al. Implementing guidelines and training initiatives to  
47 improve cross-cultural communication in primary care consultations: a qualitative participatory  
48  
49 European study. *International Journal for Equity in Health* 2017;16(1):32. doi: 10.1186/s12939-017-  
50  
51 0525-y  
52  
53  
54 49. Ritchie J, Spencer L. Qualitative data analysis for applied policy research. In: Bryman A, Burgess  
55  
56 RG, eds. *Analyzing qualitative data*. London: Routledge 1994:173-94.  
57  
58  
59  
60

1  
2  
3 50. Michie S, van Stralen MM, West R. The behaviour change wheel: A new method for  
4  
5 characterising and designing behaviour change interventions. *Implementation Science* 2011;6(1):42.  
6

7 51. Mackenzie M, Conway E, Hastings A, et al. Is "candidacy" a useful concept for understanding  
8  
9 journeys through public services? A critical interpretive literature synthesis. *Social Policy &*  
10  
11 *Administration* 2013;47(7):806-25. doi: 10.1111/j.1467-9515.2012.00864.x  
12

13 52. Mackenzie M, Conway E, Hastings A, et al. Intersections and multiple 'candidacies': Exploring  
14  
15 connections between two theoretical perspectives on domestic abuse and their implications for  
16  
17 practicing policy. *Social Policy and Society* 2015;14(01):43-62. doi: doi:10.1017/S1474746414000244  
18  
19  
20  
21  
22  
23  
24  
25  
26  
27  
28  
29  
30  
31  
32  
33  
34  
35  
36  
37  
38  
39  
40  
41  
42  
43  
44  
45  
46  
47  
48  
49  
50  
51  
52  
53  
54  
55  
56  
57  
58  
59  
60

1  
2  
3  
4  
5  
6  
7  
8  
9  
10  
11  
12  
13  
14  
15  
16  
17  
18  
19  
20  
21  
22  
23  
24  
25  
26  
27  
28  
29  
30  
31  
32  
33  
34  
35  
36  
37  
38  
39  
40  
41  
42  
43  
44  
45  
46  
47  
48  
49  
50  
51  
52  
53  
54  
55  
56  
57  
58  
59  
60

**Figure 1. The three stages of RESTORE**

**Figure 2. Stages of NPT training and alignment with RESTORE fieldwork**

**Figure 3. NPT 'light' training material**

**Figure 4. Example of a visual data mapping exercise**

For peer review only

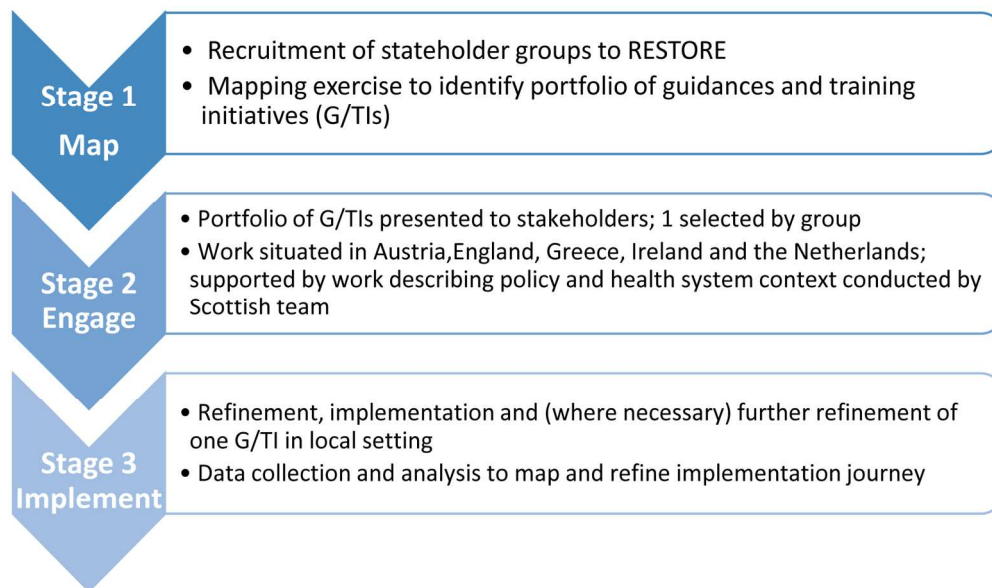

Figure 1. The three stages of RESTORE

154x91mm (300 x 300 DPI)

Review only

1  
2  
3  
4  
5  
6  
7  
8  
9  
10  
11  
12  
13  
14  
15  
16  
17  
18  
19  
20  
21  
22  
23  
24  
25  
26  
27  
28  
29  
30  
31  
32  
33  
34  
35  
36  
37  
38  
39  
40  
41  
42  
43  
44  
45  
46  
47  
48  
49  
50  
51  
52  
53  
54  
55  
56  
57  
58  
59  
60

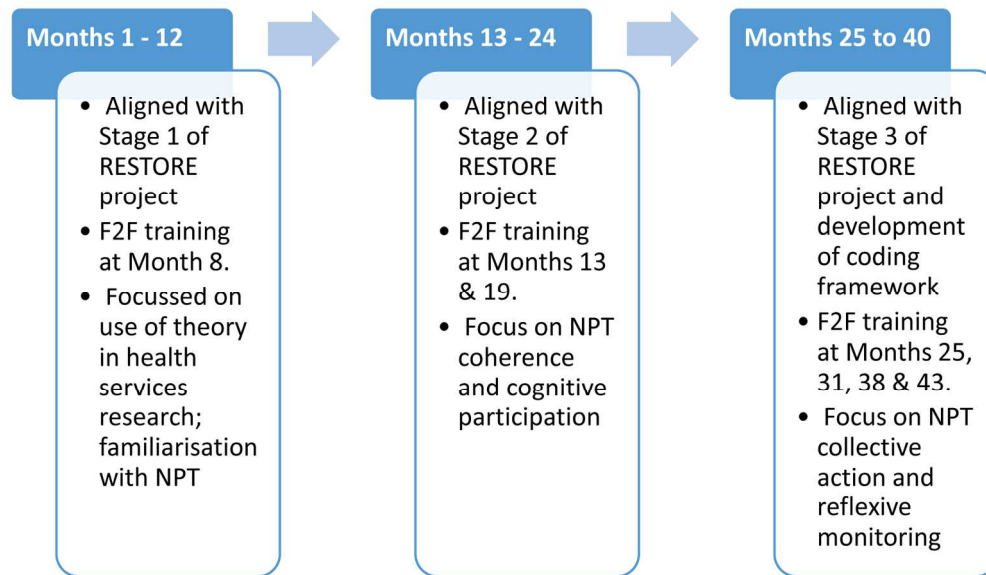

Figure 2. Stages of NPT training and alignment with RESTORE fieldwork

154x90mm (300 x 300 DPI)

1  
2  
3  
4  
5  
6  
7  
8  
9  
10  
11  
12  
13  
14  
15  
16  
17  
18  
19  
20  
21  
22  
23  
24  
25  
26  
27  
28  
29  
30  
31  
32  
33  
34  
35  
36  
37  
38  
39  
40  
41  
42  
43  
44  
45  
46  
47  
48  
49  
50  
51  
52  
53  
54  
55  
56  
57  
58  
59  
60

**Question: Do we think a circus tent can become a normalised venue for accommodation for our next RESTORE team meeting?**



In addressing this question, consider the following NPT sensitising questions:

Does this make sense to the team as a whole and to individuals within the team?  
(Coherence)

What work needs to be done to get everyone in the team to engage with the idea?  
(Cognitive participation)

Who needs to do what to put this into action? What resources do we need? (Collective action)

How will we know if it worked in practice? (Reflexive monitoring)

Figure 3. NPT "light" training material

149x132mm (300 x 300 DPI)

only



1  
2  
3  
4  
5  
6  
7  
8  
9  
10  
11  
12  
13  
14  
15  
16  
17  
18  
19  
20  
21  
22  
23  
24  
25  
26  
27  
28  
29  
30  
31  
32  
33  
34  
35  
36  
37  
38  
39  
40  
41  
42  
43  
44  
45  
46  
47  
48  
49  
50  
51  
52  
53  
54  
55  
56  
57  
58  
59  
60

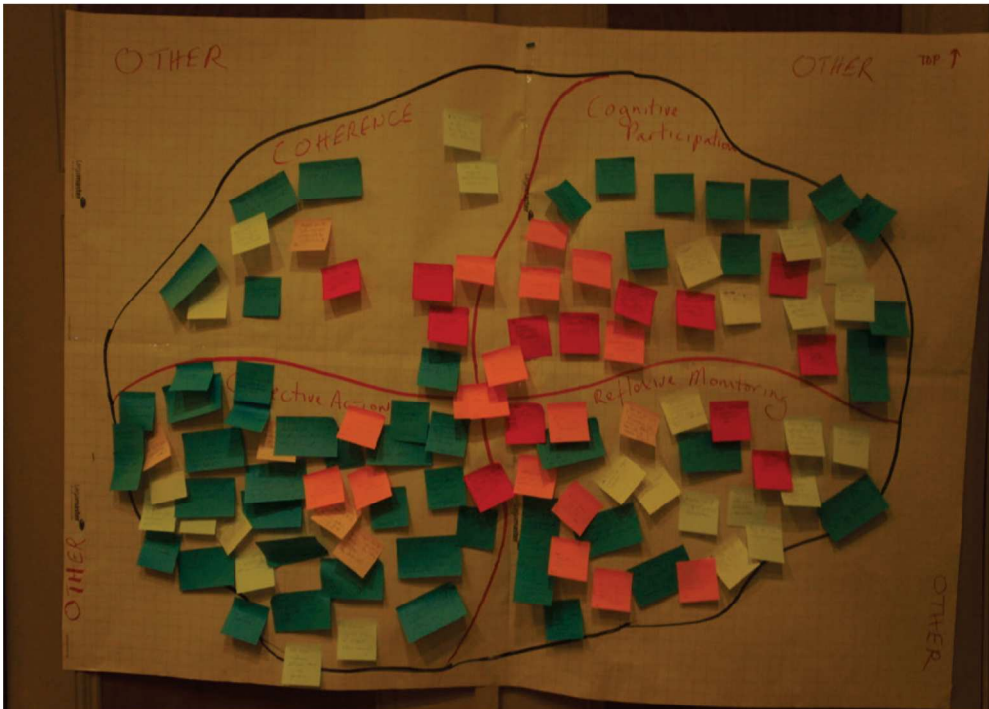

Each “sticky” notelet corresponds to an item of verbal data identified from the interactive role play discussion

Figure 4. Example of a visual data mapping exercise

160x129mm (300 x 300 DPI)

For peer review only

## Supplementary File 1. RESTORE team backgrounds and NPT experience

| Country           | Professional background                                                | Experience of NPT                                                   | Country            | Professional background        | Experience of NPT                                                                                  |
|-------------------|------------------------------------------------------------------------|---------------------------------------------------------------------|--------------------|--------------------------------|----------------------------------------------------------------------------------------------------|
| <b>Austria</b>    |                                                                        |                                                                     | <b>Ireland</b>     |                                |                                                                                                    |
| RESTORE Applicant | Academic general practitioner                                          | New to NPT                                                          | RESTORE Applicant  | Social scientist               | Experienced in use of NPT; part of original group who developed NPT; using NPT in several projects |
| Researcher        | Social scientist                                                       | New to NPT                                                          | Researcher         | Social/cultural anthropologist | Familiar with NPM; New to NPT                                                                      |
|                   |                                                                        |                                                                     | Researcher         | Social/cultural anthropologist | New to NPT                                                                                         |
| <b>England</b>    |                                                                        |                                                                     | <b>Netherlands</b> |                                |                                                                                                    |
| RESTORE Applicant | Academic general practitioner                                          | Experienced in use of NPT; part of original group who developed NPT | RESTORE Applicant  | Academic general practitioner  | New to NPT                                                                                         |
| Researcher        | Social anthropologist                                                  | New to NPT                                                          | RESTORE Applicant  | Academic general practitioner  | New to NPT                                                                                         |
| Researcher        | Social scientist                                                       | New to NPT                                                          | Researcher         | Academic general practitioner  | New to NPT                                                                                         |
|                   |                                                                        |                                                                     | Researcher         | Social/cultural anthropologist | New to NPT                                                                                         |
| <b>Greece</b>     |                                                                        |                                                                     | <b>Scotland</b>    |                                |                                                                                                    |
| RESTORE Applicant | Academic general practitioner; Primary health care services researcher | New to NPT                                                          | RESTORE Applicant  | Health services research       | Experienced in use of NPT; part of NIHR NPT user group; using NPT in several projects              |
| Researcher        | Public health researcher                                               | New to NPT                                                          | RESTORE Applicant  | Academic general practitioner  | Experienced in use of NPT; part of original group who developed NPT; using NPT in                  |

1  
2  
3  
4  
5  
6  
7  
8  
9  
10  
11  
12  
13  
14  
15  
16  
17  
18  
19  
20  
21  
22  
23  
24  
25  
26  
27  
28  
29  
30  
31  
32  
33  
34  
35  
36  
37  
38  
39  
40  
41  
42  
43  
44  
45  
46  
47

several projects  
New to NPT

Researcher

Lecturer in social  
work

New to NPT

Researcher

Sociologist

For peer review only

## Supplementary File 2. NPT training programme

| Training                                         | Session & Duration                 | Content                                                                                                                                                                                                                                                                                                                                                |
|--------------------------------------------------|------------------------------------|--------------------------------------------------------------------------------------------------------------------------------------------------------------------------------------------------------------------------------------------------------------------------------------------------------------------------------------------------------|
| <b>Early project training (Months 1 to 12)</b>   |                                    |                                                                                                                                                                                                                                                                                                                                                        |
| Month 8<br>November<br>2011                      | Training Session 1.<br>(2.5 hours) | <b>Introduction to NPT.</b><br>Development of NPT from ehealth research.<br><br>Overview of NPT and its four main constructs.                                                                                                                                                                                                                          |
|                                                  | Training Session 2.<br>(4.5 hours) | <b>Using NPT in RESTORE.</b><br>Example of using NPT in a qualitative study on use of interpreters in primary care.<br><br>Using NPT in RESTORE – focus on constructs of coherence and cognitive participation<br><br>Participatory Exercise 1: Team asked to think about the issues arising from implementation of paid interpreters in primary care. |
| <b>Mid-project training (Months 13 to 24)</b>    |                                    |                                                                                                                                                                                                                                                                                                                                                        |
| Month 13<br>April 2012                           | Training Session 3.<br>(2.0 hours) | <b>Using NPT in RESTORE.</b><br>Focus of NPT constructs coherence and cognitive participation.<br><br>Participatory Exercise 2: NPT “light” non-RESTORE exercise                                                                                                                                                                                       |
|                                                  | Training Session 4.<br>(2.0 hours) | Focus of NPT constructs coherence and cognitive participation.<br><br>Participatory Exercise 3: NPT RESTORE exercise                                                                                                                                                                                                                                   |
| Month 20<br>November<br>2012                     | Training Session 5<br>(2.0 hours)  | <b>Addressing anxieties.</b><br>Roundtable discussion of arising concerns.<br>Review of why NPT being used and its role in the project.                                                                                                                                                                                                                |
|                                                  | Training Session 6<br>(2.0 hours)  | <b>Using NPT in RESTORE.</b><br>Participatory Exercise 4: NPT RESTORE exercise                                                                                                                                                                                                                                                                         |
| <b>Later training sessions (Months 25 to 48)</b> |                                    |                                                                                                                                                                                                                                                                                                                                                        |
| Month 25<br>April 2013                           | Training session 7<br>(2.5 hours)  | <b>Coding using NPT.</b><br>Preparatory work of coding data extract; face-to-face discussion of coding decisions at Consortium training.<br>Participatory Exercise 5: Discussion of coded extract of RESTORE data.                                                                                                                                     |
| Month 31<br>October 2013                         | Training session 8<br>(1.5 hours)  | <b>Addressing anxieties.</b><br>Roundtable discussion of progress with respect to using NPT                                                                                                                                                                                                                                                            |

|    |              |                    |                                                            |
|----|--------------|--------------------|------------------------------------------------------------|
| 1  |              |                    |                                                            |
| 2  |              |                    |                                                            |
| 3  |              |                    | in fieldwork and in coding.                                |
| 4  |              |                    |                                                            |
| 5  |              | Training session 9 | <b>Coding using NPT.</b>                                   |
| 6  |              | (3 hours)          | Team reviewed coding exercise conducted in-between face-   |
| 7  |              |                    | to-face meetings; discussed Irish data transcript coded by |
| 8  |              |                    | AMacF; and discussed team coding “dilemmas”.               |
| 9  |              |                    |                                                            |
| 10 | Month 38     | Training session   | <b>Coding using NPT.</b>                                   |
| 11 | May 2014     | 10                 | Focused on reviewing where each country team was in        |
| 12 |              | (3 hours)          | relation to NPT coding; connections between fieldwork and  |
| 13 |              |                    | NPT; identifying and discussing coding dilemmas.           |
| 14 |              |                    |                                                            |
| 15 | Month 43     | Training session   | Final discussion and clarification of coding framework.    |
| 16 | October 2014 | 11                 |                                                            |
| 17 | <hr/>        |                    |                                                            |
| 18 |              |                    |                                                            |
| 19 |              |                    |                                                            |
| 20 |              |                    |                                                            |
| 21 |              |                    |                                                            |
| 22 |              |                    |                                                            |
| 23 |              |                    |                                                            |
| 24 |              |                    |                                                            |
| 25 |              |                    |                                                            |
| 26 |              |                    |                                                            |
| 27 |              |                    |                                                            |
| 28 |              |                    |                                                            |
| 29 |              |                    |                                                            |
| 30 |              |                    |                                                            |
| 31 |              |                    |                                                            |
| 32 |              |                    |                                                            |
| 33 |              |                    |                                                            |
| 34 |              |                    |                                                            |
| 35 |              |                    |                                                            |
| 36 |              |                    |                                                            |
| 37 |              |                    |                                                            |
| 38 |              |                    |                                                            |
| 39 |              |                    |                                                            |
| 40 |              |                    |                                                            |
| 41 |              |                    |                                                            |
| 42 |              |                    |                                                            |
| 43 |              |                    |                                                            |
| 44 |              |                    |                                                            |
| 45 |              |                    |                                                            |
| 46 |              |                    |                                                            |
| 47 |              |                    |                                                            |
| 48 |              |                    |                                                            |
| 49 |              |                    |                                                            |
| 50 |              |                    |                                                            |
| 51 |              |                    |                                                            |
| 52 |              |                    |                                                            |
| 53 |              |                    |                                                            |
| 54 |              |                    |                                                            |
| 55 |              |                    |                                                            |
| 56 |              |                    |                                                            |
| 57 |              |                    |                                                            |
| 58 |              |                    |                                                            |
| 59 |              |                    |                                                            |
| 60 |              |                    |                                                            |

1  
2  
3  
4  
5  
6  
7  
8  
9  
10  
11  
12  
13  
14  
15  
16  
17  
18  
19  
20  
21  
22  
23  
24  
25  
26  
27  
28  
29  
30  
31  
32  
33  
34  
35  
36  
37  
38  
39  
40  
41  
42  
43  
44  
45  
46  
47  
48  
49  
50  
51  
52  
53  
54  
55  
56  
57  
58  
59  
60

### Supplementary File 3. Participatory exercises

---

|                                       |                                                                                                                                                                                                                                                                                                                                                                                                                                                                                                                                                                                                                                                                                                                                                                                                                                                            |
|---------------------------------------|------------------------------------------------------------------------------------------------------------------------------------------------------------------------------------------------------------------------------------------------------------------------------------------------------------------------------------------------------------------------------------------------------------------------------------------------------------------------------------------------------------------------------------------------------------------------------------------------------------------------------------------------------------------------------------------------------------------------------------------------------------------------------------------------------------------------------------------------------------|
| Month 8,<br>Participatory Exercise 1  | <p>Consider the following scenario: Your health organisation is about to introduce paid interpreters into the primary care consultation. What NPT-informed questions might you ask to assess how well this is implemented into practice?</p> <p>Participants were directed to the NPT toolkit, with its 16 questions, to help them “think this through”</p>                                                                                                                                                                                                                                                                                                                                                                                                                                                                                                |
| Month 13,<br>Participatory Exercise 2 | <p>NPT “light”: An exercise designed to get the research team thinking about coherence (understanding) and cognitive participation (participation). Using interactive small group work, the team focussed on an example entitle “Circus tent”. Teams were asked to consider if a circus tent could become normalised as team accommodation for future Consortium meetings.</p> <p>While the team debated this, the NPT trainers observed the questions, took notes and assigned these to NPT categories. E.g.</p> <p>Is this something new to me? (Coherence - Differentiation)</p> <p>Do you think this will be helpful to the team? (Coherence – Internalisation)</p> <p>Will everyone agree that this is reasonable? (Cognitive participation - Legitimation)</p> <p>How many of the team buy into this idea? (Cognitive participation = Enrolment)</p> |
| Month 13,<br>Participatory Exercise 3 | <p>NPT RESTORE exercise: Teams asked to consider the issues that might arise when implementing paid interpreters in primary care. Half of the team were assigned roles (GP, nurse, interpreter, migrant patient) and role-played a discussion about using interpreters; other half of team watched, noting key questions and issues that arose, then assigned these to NPT constructs.</p> <p>N.B. The exercise was designed to focus on the constructs of coherence and cognitive participation; however, teams also had to pay attention to collective action and reflexive monitoring.</p>                                                                                                                                                                                                                                                              |
| Month 20,<br>Participatory Exercise 4 | <p>NPT RESTORE exercise: Teams given the G/PI selected by the Irish team. Asked to role play as a practice team with roles assigned to address the question “What levels and barriers will you encounter as you try to implement this guidance in practice?”.</p> <p>Project members took turns at either role playing or noting NPT issue and assigning them to constructs.</p>                                                                                                                                                                                                                                                                                                                                                                                                                                                                           |
| Month 25,<br>Participatory Exercise 5 | <p>NPT RESTORE exercise: Teams pre-circulated a short extract from a training DVD developed by the PLA trainers in which the Irish team role-played a training session with stakeholders. Teams were asked to code the qualitative extract to the main NPT construct. Three external researchers expert in the use of NPT also asked to code the extract, as</p>                                                                                                                                                                                                                                                                                                                                                                                                                                                                                           |

---

1  
2  
3  
4  
5  
6  
7  
8  
9  
10  
11  
12  
13  
14  
15  
16  
17  
18  
19  
20  
21  
22  
23  
24  
25  
26  
27  
28  
29  
30  
31  
32  
33  
34  
35  
36  
37  
38  
39  
40  
41  
42  
43  
44  
45  
46  
47  
48  
49  
50  
51  
52  
53  
54  
55  
56  
57  
58  
59  
60

well as RESTORE NPT training team. Coding collated and presented, paragraph by paragraph, to team at face-to-face meeting.

---

For peer review only

**Supplementary File 4. Location of NPT presentations on Slideshare**

NPT Unpicked for the RESTORE project (<http://www.slideshare.net/KateODonnell6/npt-unpicked-for-restore-project-57742520>).

NPT training session 2 for RESTORE (<http://www.slideshare.net/KateODonnell6/npt-training-session-2-for-restore>)

NPT in RESTORE (<http://www.slideshare.net/KateODonnell6/npt-in-restore>)

NPT Coding exercise for RESTORE (<http://www.slideshare.net/KateODonnell6/npt-coding-exercise-for-restore-57743364>)

For peer review only



1  
2  
3  
4  
5  
6  
7  
8  
9  
10  
11  
12  
13  
14  
15  
16  
17  
18  
19  
20  
21  
22  
23  
24  
25  
26  
27  
28  
29  
30  
31  
32  
33  
34  
35  
36  
37  
38  
39  
40  
41  
42  
43  
44  
45  
46  
47  
48  
49

O'Donnell et al.

**Supporting the use of theory in cross-country health services research: Normalisation Process Theory as an example**

**Reporting Checklist.**

**Checklist used:** Smith L, Rosenzweig L, Schmidt M. Best practices in the reporting of participatory action research: Embracing both the forest and the trees. The Counseling Psychologist 2010;**38**(8):1115-38

**Guidelines for the reporting of participatory action research (PAR).**

| Criteria from Smith et al                    | As reported in O'Donnell et al                                                                                                                                                                                                                                                                                                                                                                                                                                                                                                                                                                                                                                                                                                                         |
|----------------------------------------------|--------------------------------------------------------------------------------------------------------------------------------------------------------------------------------------------------------------------------------------------------------------------------------------------------------------------------------------------------------------------------------------------------------------------------------------------------------------------------------------------------------------------------------------------------------------------------------------------------------------------------------------------------------------------------------------------------------------------------------------------------------|
| <b>Organisational structure of the paper</b> | <p>We have based the organizational structure of our paper on the guidance issued by BMJ Open. We have, therefore, reported using the structure of Introduction, Methods, Results, Discussion.</p> <p>While we have sought to match the content of each section to the general expectations of the BMJ Open audience, the Methods section contains a more descriptive account on the way that the training programme evolved and developed in response to the needs of the research team.</p> <p>Again, the discussion section moves beyond a conventional discussion and is the place where we include our generic recommendations which, we believe, could be applied to the development of training in the use of other theoretical frameworks.</p> |
| <b>Key elements of the project</b>           | <p>Please note: in the application of this checklist, the term 'project' is taken to apply to the training programme in the use of NPT (hereafter described as the 'NPT training programme', which is the subject of this paper. Where necessary, we also refer to RESTORE, which was the FP7 funded research project that the NPT training programme was designed to support. We hope this</p>                                                                                                                                                                                                                                                                                                                                                        |

|                                                  |                                                                                                                                                                                                                                                                                                                                                                                                                                                                                                                                                                                                                                                                                                                                                                                                                                                                                                                                                                                                                                                                                                                                                                                                                                                                                                                                                              |
|--------------------------------------------------|--------------------------------------------------------------------------------------------------------------------------------------------------------------------------------------------------------------------------------------------------------------------------------------------------------------------------------------------------------------------------------------------------------------------------------------------------------------------------------------------------------------------------------------------------------------------------------------------------------------------------------------------------------------------------------------------------------------------------------------------------------------------------------------------------------------------------------------------------------------------------------------------------------------------------------------------------------------------------------------------------------------------------------------------------------------------------------------------------------------------------------------------------------------------------------------------------------------------------------------------------------------------------------------------------------------------------------------------------------------|
|                                                  | distinction is clear in our responses below.                                                                                                                                                                                                                                                                                                                                                                                                                                                                                                                                                                                                                                                                                                                                                                                                                                                                                                                                                                                                                                                                                                                                                                                                                                                                                                                 |
| How was the project initiated?                   | <p>The NPT training programme was initiated in response to the needs of the RESTORE research team, to support them in their understanding and use of the theoretical framework being used. This is described in the paper as follows:</p> <p><b>Introduction, Page 7:</b> Research teams must be comfortable and aligned with the use of the selected theory and in agreement about the meaning and application of its individual components or constructs. Such challenges are enhanced when teams are working in different settings, countries and across language as construct understanding and implementation are likely to be both culturally and context-dependent. This mirrors challenges identified in conducting qualitative research across different settings.<sup>26</sup> These challenges faced the EU-funded RESTORE project, a multi-site implementation study across six European countries (Box 1).<sup>27</sup> Focussed on cross-cultural communication in primary care, the design and analysis of RESTORE was underpinned throughout by a recognised theoretical framework - Normalisation Process Theory (NPT). However, the application of theory to a research study was a new concept for many members of the team. As a result, we had to develop a training programme to familiarise and support the team in this process.</p> |
| What was the project's timeframe?                | <p>The RESTORE project was a 48-month project (see Figure 1); the NPT training programme was initiated at month 8 and ran in tandem with the project. This is described on Page 12 and illustrated in Figure 2:</p> <p><b>Methods, Page 12: Application of theory to the RESTORE study</b></p> <p>As described previously, the RESTORE project was designed in three, inter-related stages (Figure 1). Although not entirely linear, the study was designed to broadly align to the four constructs of NPT (Figure 2). Stage 1 focused on familiarisation, first on the broad need to apply theory to RESTORE and then, with NPT itself. Stage 2 mapped to coherence and cognitive participation; Stage 3 mapped to collective action and reflexive monitoring. This structure then influenced the design of the training for the team, which is now described in detail.</p>                                                                                                                                                                                                                                                                                                                                                                                                                                                                                |
| Who were the participants and/or co-researchers? | <p>The participants were the 19 members of the RESTORE research team. They were also the co-researchers in the design, application and evaluation of the NPT training programme. The team consisted of the senior academics who wrote the RESTORE funding application and the researchers who were employed on RESTORE. The team was multi-professional and multi-disciplinary, consisting of academic general practitioners/family doctors, anthropologists, social</p>                                                                                                                                                                                                                                                                                                                                                                                                                                                                                                                                                                                                                                                                                                                                                                                                                                                                                     |

1  
2  
3  
4  
5  
6  
7  
8  
9  
10  
11  
12  
13  
14  
15  
16  
17  
18  
19  
20  
21  
22  
23  
24  
25  
26  
27  
28  
29  
30  
31  
32  
33  
34  
35  
36  
37  
38  
39  
40  
41  
42  
43  
44  
45  
46  
47  
48  
49

|                                                                                  |                                                                                                                                                                                                                                                                                                                                                                                                                                                                                                                                                                                                                                                                                                                                                                                                                                                                                                                                                                                                                                                                                                                                                                                                                                      |
|----------------------------------------------------------------------------------|--------------------------------------------------------------------------------------------------------------------------------------------------------------------------------------------------------------------------------------------------------------------------------------------------------------------------------------------------------------------------------------------------------------------------------------------------------------------------------------------------------------------------------------------------------------------------------------------------------------------------------------------------------------------------------------------------------------------------------------------------------------------------------------------------------------------------------------------------------------------------------------------------------------------------------------------------------------------------------------------------------------------------------------------------------------------------------------------------------------------------------------------------------------------------------------------------------------------------------------|
|                                                                                  | <p>scientists and health services/primary care researchers.</p> <p>The composition of the team is described in the <b>abstract</b>, in <b>Methods page 9</b> and more fully in <b>Supplementary File 1</b>.</p> <p><b>Abstract: Participants:</b> RESTORE research team consisting 8 project applicants, all senior primary care academics; 10 researchers. Professional backgrounds included 7 academic general practitioners; 4 social/cultural anthropologists; 4 sociologists; 3 health services/primary care researchers.</p> <p><b>Methods, Page 9: The RESTORE Team</b></p> <p>The research team included research and clinical disciplines, with a wide range of expertise and knowledge of the chosen theoretical framework (Supplementary File 1). Three country teams (Austria, Greece and the Netherlands) had no experience of using NPT. Four team members (MacFarlane, Mair, Dowrick and O'Donnell) had extensive experience of using NPT<sup>33-36</sup> including applying NPT prospectively to complex interventions.<sup>29 37-39</sup> These four team members thus formed the NPT trainers group, leading the development and delivery of the training reported here.</p>                                       |
| <p>What was the extent of their participation and the nature of their roles?</p> | <p>Four members of the team were experienced in the application of NPT to research projects and so took on the role of NPT programme trainers. The other members of the team were fully engaged in th training programme, first by participating in the NPT training programme and second, by their feedback and reflection on the process. Importantly, it was their feedback on the training that led to the continual development and evolution of the training programme.</p> <p>This is reported at various points of the paper, including:</p> <p><b>Methods, Pages 13 – 17:</b> See paper for text.</p> <p><b>Results, Pages 17 – 19:</b> See paper for text.</p> <p><b>Discussion, Page 22:</b> Throughout our training programme, we allowed ample time for concerns to be raised and discussed and for the team to develop solutions. An advantage of the time spent of training was apparent, however, later in the project as we moved onto coding the qualitative data generated across multiple sites. By then, the time spent in early training ensured that the team had a much clearer and consistent view of the constructs and their meaning, leading to a consistency and robustness in coding and analysis.</p> |

|                                                                                                                                                                                                                                                                                                                                           |                                                                                                                                                                                                                                                                                                                                                                                                                                                                                                                                                                                                                                                                                                                                                                                                                                                                                                                                                                                                                                                                                                                                                                                                                                                                                                                                                                                                                                                                                                                                                                                                                                                                                                                                                                                                                                                                                                                                                                                                                                                                                                                                                                                                                                                                                                                                                                                                                                                                                                                                                                                                                                                                       |
|-------------------------------------------------------------------------------------------------------------------------------------------------------------------------------------------------------------------------------------------------------------------------------------------------------------------------------------------|-----------------------------------------------------------------------------------------------------------------------------------------------------------------------------------------------------------------------------------------------------------------------------------------------------------------------------------------------------------------------------------------------------------------------------------------------------------------------------------------------------------------------------------------------------------------------------------------------------------------------------------------------------------------------------------------------------------------------------------------------------------------------------------------------------------------------------------------------------------------------------------------------------------------------------------------------------------------------------------------------------------------------------------------------------------------------------------------------------------------------------------------------------------------------------------------------------------------------------------------------------------------------------------------------------------------------------------------------------------------------------------------------------------------------------------------------------------------------------------------------------------------------------------------------------------------------------------------------------------------------------------------------------------------------------------------------------------------------------------------------------------------------------------------------------------------------------------------------------------------------------------------------------------------------------------------------------------------------------------------------------------------------------------------------------------------------------------------------------------------------------------------------------------------------------------------------------------------------------------------------------------------------------------------------------------------------------------------------------------------------------------------------------------------------------------------------------------------------------------------------------------------------------------------------------------------------------------------------------------------------------------------------------------------------|
| <p>1<br/>2<br/>3<br/>4<br/>5<br/>6<br/>7<br/>8<br/>9<br/>10<br/>11<br/>12<br/>13<br/>14<br/>15<br/>16<br/>17<br/>18<br/>19<br/>20<br/>21<br/>22<br/>23<br/>24<br/>25<br/>26<br/>27<br/>28<br/>29<br/>30<br/>31<br/>32<br/>33<br/>34<br/>35<br/>36<br/>37<br/>38</p> <p>What was the process within and/or methodology of the project?</p> | <p>The methodology of the work was informed by Participatory Learning and Action (PLA), mirroring the use of PLA in the wider RESTORE project itself. Throughout, we collected qualitative data from the RESTORE team on their views of the training sessions, analysed these data thematically and used the findings to inform the design of later training sessions. This is described in the paper:</p> <p><b>Methods, Page 14:</b> This approach, however, proved too prescriptive and over-whelming for team members trying to assimilate knowledge about applying theory to research (see Results). This led to several important modifications in the development of the training. In consultation with our PLA experts (MO'RdeB and TdeB), we incorporated more PLA-informed exercises and approaches into the training.<sup>42</sup> Consequently, later sessions had one or at most two short didactic presentations, with the remaining time spent on participatory exercises. The training content was aligned more closely to the temporal arrangement of the project itself and linked to the over-arching constructs of NPT. Thus, we focused principally on sense-making (coherence) and engagement work (cognitive participation) first, before turning to the actual work undertaken (collective action) and, finally, monitoring and appraisal work (reflexive monitoring) (Figure 2).</p> <p><b>Methods, Pages 16-17: Evaluation of the NPT training content</b></p> <p>Face-to-face training was evaluated qualitatively at the end of each training day. Methods included: written lists of the 3 most positive and 3 most negative features of the training; speed evaluation where each participant was given two minutes to verbally record which aspects of training had, or had not, been effective for them; scoring elements of the training on a Likert scale (e.g. from 1 = very poor to 5 = very good). These data were collected either as short written comments or recorded on a digital recorder. Trainers reviewed the feedback thematically and used it to inform subsequent training sessions. Additional evaluation was conducted approximately three weeks after the first session, when the team were emailed a short set of questions asking what had worked well; what had not worked well; and what they wanted from future training sessions. The results of the evaluations were summarised and fed back at RESTORE Consortium meetings providing researchers with a further opportunity to comment on whether they believed all the key issues or suggestions regarding training had been captured and addressed.</p> |
| <p>39<br/>40<br/>41<br/>42<br/>43<br/>44<br/>45<br/>46<br/>47<br/>48<br/>49</p> <p>What were the project outcomes and/or</p>                                                                                                                                                                                                              | <p>Training outcomes were increased confidence and comfort amongst the RESTORE research team</p>                                                                                                                                                                                                                                                                                                                                                                                                                                                                                                                                                                                                                                                                                                                                                                                                                                                                                                                                                                                                                                                                                                                                                                                                                                                                                                                                                                                                                                                                                                                                                                                                                                                                                                                                                                                                                                                                                                                                                                                                                                                                                                                                                                                                                                                                                                                                                                                                                                                                                                                                                                      |

|                                                                                                             |                                                                                                                                                                                                                                                                                                                                                                                                                                                                                       |
|-------------------------------------------------------------------------------------------------------------|---------------------------------------------------------------------------------------------------------------------------------------------------------------------------------------------------------------------------------------------------------------------------------------------------------------------------------------------------------------------------------------------------------------------------------------------------------------------------------------|
| emergent actions?                                                                                           | in (i) the use of theory in health services research projects; (ii) understanding of NPT.                                                                                                                                                                                                                                                                                                                                                                                             |
| What comes next (if the project is on-going)?                                                               | The RESTORE project is now finished. We hope, however, that this paper and our generic recommendations can be used to support training for other health service research projects whether they are using NPT or another theoretical framework. See <b>Discussion, Page 21</b> .                                                                                                                                                                                                       |
| Consider charts, guidelines, tables, graphics to convey part or all of the project design                   | We have illustrated our data with a number of Figures and Illustrations.                                                                                                                                                                                                                                                                                                                                                                                                              |
| <b>Convey the experiences of the co-researchers</b>                                                         |                                                                                                                                                                                                                                                                                                                                                                                                                                                                                       |
| Pay attention to who is writing the article and how their voices and experiences are represented            | Although the lead author (COD) was one of the trainers, the paper has actively involved all members of the team. Therefore, we believe that all the voices of the RESTORE team are represented in this work.                                                                                                                                                                                                                                                                          |
| Pay attention to who is <i>not</i> writing the article and how their voices and experiences are represented | See above.                                                                                                                                                                                                                                                                                                                                                                                                                                                                            |
| What were the personal outcomes of the project?                                                             | A principal aim was to increase individuals' knowledge, expertise and confidence both in the use of theory in health services research projects more generally, and in the use of NPT in particular. We believe that we evidence that these personal outcomes were met. In addition, the team's level of understanding and confidence had the unintended consequence of aiding later processes within the RESTORE project such as cross-country qualitative data coding and analysis. |
| <b>Address the challenges, pitfalls, and limitations of the project</b>                                     |                                                                                                                                                                                                                                                                                                                                                                                                                                                                                       |
| What were they?                                                                                             | We have discussed the general strengths and limitations of the project in the discussion:<br><b>Discussion, Page 23: Strengths and Limitations</b><br>This training programme in the use of a mid-level theory was developed for a multi-disciplinary team working across 6 European countries; thus, it also had to pay careful attention to both language and cultural differences across the RESTORE research team. The evaluation and careful                                     |

|                               |                                                                                                                                                                                                                                                                                                                                                                                                                                                                                                                                                                                                                                                                                                                                                                                                                                                                                                                                                                                                                                                                                                                                                                                                                                                                                                                                                                                                                                                                                                                                                                                                                                                                                                                                                                                                                                                                                        |
|-------------------------------|----------------------------------------------------------------------------------------------------------------------------------------------------------------------------------------------------------------------------------------------------------------------------------------------------------------------------------------------------------------------------------------------------------------------------------------------------------------------------------------------------------------------------------------------------------------------------------------------------------------------------------------------------------------------------------------------------------------------------------------------------------------------------------------------------------------------------------------------------------------------------------------------------------------------------------------------------------------------------------------------------------------------------------------------------------------------------------------------------------------------------------------------------------------------------------------------------------------------------------------------------------------------------------------------------------------------------------------------------------------------------------------------------------------------------------------------------------------------------------------------------------------------------------------------------------------------------------------------------------------------------------------------------------------------------------------------------------------------------------------------------------------------------------------------------------------------------------------------------------------------------------------|
|                               | <p>monitoring of both the development and delivery of the training is a clear strength of this work. That the training programme was acceptable to such a diverse group is another strength. Weaknesses include the small group of researchers involved, although the team did include a range of disciplinary and research backgrounds. The training was focused on the use of only one theoretical framework – NPT – but we believe that the lessons learned from this and the recommendations arising from the work are applicable to other theoretical frameworks.</p>                                                                                                                                                                                                                                                                                                                                                                                                                                                                                                                                                                                                                                                                                                                                                                                                                                                                                                                                                                                                                                                                                                                                                                                                                                                                                                             |
| <p>How were they managed?</p> | <p>A particular challenge in the training programme was managing the different levels of knowledge and expertise within the team. One important lesson was the need to build in time for critical reflection and discussion of the process – this is discussed within the Results section.</p> <p><b>Results, Page 18:</b> Interactive exercises and role play designed to focus on coherence and cognitive participation also spontaneously picked up issues relating to collective action (who would actually do the work; how would it be funded) and reflexive monitoring (how would teams know if professional interpreters had an impact). This served as an important reminder that, even when NPT sensitising questions from researchers were designed to focus on sense-making and engagement, other issues would naturally emerge in the discussion, emphasising the lack of linearity in the application of theory to data generation.</p> <p>On-going telephone and email contact ensured that difficulties and tensions were quickly surfaced, particularly when theory was being applied to fieldwork. Training at month 20 began with an intensive de-briefing, where in-country teams were encouraged to freely discuss their concerns and challenges arising from using NPT. These focussed on two, related, concerns. There was a continued lack of confidence in their knowledge of NPT itself and of being able to correctly map issues and data generated in the field to the NPT constructs. However, the use of visual methods of collecting and displaying data generated during the interactive group exercises, as exemplified in PLA approaches,<sup>42</sup> meant that the trainers could quickly identify a high degree of fidelity in the assignment of data to NPT constructs, thus reassuring the team of their knowledge development (Figure 4).</p> |
| <p>What can we learn?</p>     | <p>We believe that a key message from our work is the set of generic recommendations which could be applied to other training programmes seeking to support the use of theory in health services research projects. These are detailed in the <b>Discussion, pages 21 – 23.</b></p>                                                                                                                                                                                                                                                                                                                                                                                                                                                                                                                                                                                                                                                                                                                                                                                                                                                                                                                                                                                                                                                                                                                                                                                                                                                                                                                                                                                                                                                                                                                                                                                                    |

1  
2  
3  
4  
5  
6  
7  
8  
9  
10  
11  
12  
13  
14  
15  
16  
17  
18  
19  
20  
21  
22  
23  
24  
25  
26  
27  
28  
29  
30  
31  
32  
33  
34  
35  
36  
37  
38  
39  
40  
41  
42  
43  
44  
45  
46  
47  
48  
49

O'Donnell et al.

BMJOpen-2016-014289

Supporting the use of theory in cross-country health services research using Normalisation Process Theory as an example: A participatory qualitative approach

Reporting Checklist.

Checklist used: Tong A, Sainsbury P, Craig J. Consolidated criteria for reporting qualitative research (COREQ): a 32-item checklist for interviews and focus groups. *International Journal for Quality in Health Care* 2007;19(6):349-57. doi: 10.1093/intqhc/mzm042

| Criteria from Tong et al                                                           | As reported in O'Donnell et al                                                                                                                                                                                                                        |
|------------------------------------------------------------------------------------|-------------------------------------------------------------------------------------------------------------------------------------------------------------------------------------------------------------------------------------------------------|
| <b>Domain 1: Research team and reflexivity.</b>                                    |                                                                                                                                                                                                                                                       |
| Personal Characteristics                                                           |                                                                                                                                                                                                                                                       |
| 1. Interviewer/facilitator. Which author/s conducted the interview or focus group? | Training and qualitative evaluation of training led by Catherine O'Donnell and Anne MacFarlane, assisted by Christopher Dowrick, Frances Mair and Mary O'Reilly de Brun.                                                                              |
| 2. Credentials What were the researcher's credentials? E.g. PhD, MD.               | Catherine O'Donnell (COD): BSc (Hons), PhD, MPH.<br>Anne MacFarlane (AMcF): BA, MA, PhD.<br>Christopher Dowrick (CD): BA, MSc, MD, CQSW, FRCGP, FFPHM.<br>Frances Mair (FM): MBChB, MD, FRCGP, DRCOG.<br>Mary O'Reilly de Brun (MORdeB): BA.Th, M.Th. |
| 3. Occupation What was their occupation at the time of the study?                  | Catherine O'Donnell (COD): Professor of Primary Care Research & Development                                                                                                                                                                           |

|                                                                                                                                                                           |                                                                                                                                                                                                                                                                                                                                                                                                                                                                                                                                                                                                   |
|---------------------------------------------------------------------------------------------------------------------------------------------------------------------------|---------------------------------------------------------------------------------------------------------------------------------------------------------------------------------------------------------------------------------------------------------------------------------------------------------------------------------------------------------------------------------------------------------------------------------------------------------------------------------------------------------------------------------------------------------------------------------------------------|
|                                                                                                                                                                           | <p>Anne MacFarlane (AMcF): Professor of Primary Healthcare Research.</p> <p>Christopher Dowrick (CD): Professor of Primary Medical Care.</p> <p>Frances Mair (FM): Professor of Primary Care Research.</p> <p>Mary O'Reilly de Brun (MORdeB): Research Fellow.</p>                                                                                                                                                                                                                                                                                                                                |
| 4. Gender. Was the researcher male or female?                                                                                                                             | NPT training team consisted of four females; one male.                                                                                                                                                                                                                                                                                                                                                                                                                                                                                                                                            |
| 5. Experience and training. What experience or training did the researcher have?                                                                                          | <p>O'Donnell, MacFarlane, Mair, Dowrick are experienced, senior primary care academics. All four have led substantive programmes of research, using quantitative and qualitative methodologies, exploring a range of primary care issues. All have extensive experience of using NPT including applying NPT prospectively to complex interventions. These four team members thus formed the NPT trainers group, leading the development and delivery of the training reported here.</p> <p>Mary O'Reilly de Brun is an experienced researcher in the use of Participatory Learning in Action.</p> |
| <b>Relationship with participants</b>                                                                                                                                     | In answering these questions, I have regarded 'participants' as the members of the research team who were the focus of the training.                                                                                                                                                                                                                                                                                                                                                                                                                                                              |
| 6. Relationship established Was a relationship established prior to study commencement?                                                                                   | Throughout the project, there was a close working relationship across the entire team of 18 individuals. Regular meetings of the project team, coupled with the training described in this paper, resulted in a strong-knot groups with high levels of confidence in each other. This also engendered a powerful sense of community within the team, which crossed county location, disciplinary background, and level of seniority.                                                                                                                                                              |
| 7. Participant knowledge of the interviewer. What did the participants know about the researcher? e.g. personal goals, reasons for doing the research                     | The NPT trainers, who led on the evaluation, were part of the full RESTORE team. Thus the other members of the RESTORE research team knew NPT trainers well. The purpose of obtaining evaluation feedback was explained to the team and all consented to their feedback being used both to inform future training, and to being used in future publications.                                                                                                                                                                                                                                      |
| 8. Interviewer characteristics. What characteristics were reported about the interviewer/facilitator? e.g. Bias, assumptions, reasons and interests in the research topic | Reasons for collecting evaluation feedback from the research team was explained, and re-iterated, at each training session. The research team knew that the NPT trainers group (COD, AMacF, CD and FM) were interested in developing future training for use with other research groups.                                                                                                                                                                                                                                                                                                          |
| <b>Domain 2: study design</b>                                                                                                                                             |                                                                                                                                                                                                                                                                                                                                                                                                                                                                                                                                                                                                   |
| <b>Theoretical framework</b>                                                                                                                                              |                                                                                                                                                                                                                                                                                                                                                                                                                                                                                                                                                                                                   |



|                                                                                                                                                                                                    |                                                                                                                                                                                                                                                                                                                                                                                                                                                                                                                                                                                                                                                                                                          |
|----------------------------------------------------------------------------------------------------------------------------------------------------------------------------------------------------|----------------------------------------------------------------------------------------------------------------------------------------------------------------------------------------------------------------------------------------------------------------------------------------------------------------------------------------------------------------------------------------------------------------------------------------------------------------------------------------------------------------------------------------------------------------------------------------------------------------------------------------------------------------------------------------------------------|
| 9. Methodological orientation and Theory. What methodological orientation was stated to underpin the study? e.g. grounded theory, discourse analysis, ethnography, phenomenology, content analysis | The methodological approach was that of Participatory Learning and Action, a participatory and democratic approach to the generation and analysis of data.<br>The theoretical framework used was Normalisation Process Theory. This is a mid-range sociological theory concerned with the work that individuals and organisations have to carry out in order to embed and normalise new, complex ways of working into routine practice. NPT operates through four principal constructs or areas of work: coherence (sense-making work); cognitive participation (engagement work); collective action (enacting work); and reflexive monitoring (appraisal work), each with its own set of sub-constructs |
| <b>Participant selection</b>                                                                                                                                                                       |                                                                                                                                                                                                                                                                                                                                                                                                                                                                                                                                                                                                                                                                                                          |
| 10. Sampling How were participants selected? e.g. purposive, convenience, consecutive, snowball                                                                                                    | There was no participant sampling; all 18 members of the RESTORE team participated in the NPT training and in the evaluation of that training.                                                                                                                                                                                                                                                                                                                                                                                                                                                                                                                                                           |
| 11. Method of approach How were participants approached? e.g. face-to-face, telephone, mail, email                                                                                                 | N/A.                                                                                                                                                                                                                                                                                                                                                                                                                                                                                                                                                                                                                                                                                                     |
| 12. Sample size How many participants were in the study?                                                                                                                                           | N/A.                                                                                                                                                                                                                                                                                                                                                                                                                                                                                                                                                                                                                                                                                                     |
| 13. Non-participation How many people refused to participate or dropped out? Reasons?                                                                                                              | All members of the RESTORE team participated in the training and evaluation of that training; there were no drop-outs.                                                                                                                                                                                                                                                                                                                                                                                                                                                                                                                                                                                   |
| <b>Setting</b>                                                                                                                                                                                     |                                                                                                                                                                                                                                                                                                                                                                                                                                                                                                                                                                                                                                                                                                          |
| 14. Setting of data collection Where was the data collected? e.g. home, clinic, workplace                                                                                                          | Data on the evaluation of the training were collected at each face-to-face RESTORE Consortium meeting. These meetings were held in the participating institutions across the 6 RESTORE countries: Austria, England, Greece, Ireland, the Netherlands and Scotland.                                                                                                                                                                                                                                                                                                                                                                                                                                       |
| 15. Presence of non-participants Was anyone else present besides the participants and researchers?                                                                                                 | No.                                                                                                                                                                                                                                                                                                                                                                                                                                                                                                                                                                                                                                                                                                      |
| 16. Description of sample What are the                                                                                                                                                             | The RESTORE research team consisting of 8 project applicants, all senior primary care academics;                                                                                                                                                                                                                                                                                                                                                                                                                                                                                                                                                                                                         |

|                                                                                                   |                                                                                                                                                                                                                                                                                                                                                                                                                                                                                                                                                                                                                                                                                                                                                                                                                                                                                          |
|---------------------------------------------------------------------------------------------------|------------------------------------------------------------------------------------------------------------------------------------------------------------------------------------------------------------------------------------------------------------------------------------------------------------------------------------------------------------------------------------------------------------------------------------------------------------------------------------------------------------------------------------------------------------------------------------------------------------------------------------------------------------------------------------------------------------------------------------------------------------------------------------------------------------------------------------------------------------------------------------------|
| important characteristics of the sample? e.g. demographic data, date                              | and 10 researchers. Professional backgrounds included general practitioners/family doctors; social/cultural anthropologists; sociologists; health services/primary care researchers.                                                                                                                                                                                                                                                                                                                                                                                                                                                                                                                                                                                                                                                                                                     |
| <b>Data collection</b>                                                                            |                                                                                                                                                                                                                                                                                                                                                                                                                                                                                                                                                                                                                                                                                                                                                                                                                                                                                          |
| 17. Interview guide Were questions, prompts, guides provided by the authors? Was it pilot tested? | Data were collected from the RESTORE team in a number of ways – all consistent with the methodological approach on Participatory Learning in Action. As described the paper methods included: written lists of the 3 most positive and 3 most negative features of the training; speed evaluation where each participant was given two minutes to verbally record which aspects of training had, or had not, been effective for them; scoring elements of the training on a Likert scale (e.g. from 1 = very poor to 5 = very good). These data were collected either as short written comments or recorded on a digital recorder. Additional evaluation was conducted approximately three weeks after the first session, when the team were emailed a short set of questions asking what had worked well; what had not worked well; and what they wanted from future training sessions. |
| 18. Repeat interviews Were repeat interviews carried out? If yes, how many?                       | No                                                                                                                                                                                                                                                                                                                                                                                                                                                                                                                                                                                                                                                                                                                                                                                                                                                                                       |
| 19. Audio/visual recording Did the research use audio or visual recording to collect the data?    | Some feedback was recorded on a digital recorder.                                                                                                                                                                                                                                                                                                                                                                                                                                                                                                                                                                                                                                                                                                                                                                                                                                        |
| 20. Field notes Were field notes made during and/or after the interview or focus group?           | No                                                                                                                                                                                                                                                                                                                                                                                                                                                                                                                                                                                                                                                                                                                                                                                                                                                                                       |
| 21. Duration What was the duration of the interviews or focus group?                              | N/A                                                                                                                                                                                                                                                                                                                                                                                                                                                                                                                                                                                                                                                                                                                                                                                                                                                                                      |
| 22. Data saturation Was data saturation discussed?                                                | N/A                                                                                                                                                                                                                                                                                                                                                                                                                                                                                                                                                                                                                                                                                                                                                                                                                                                                                      |
| 23. Transcripts returned Were transcripts returned to participants for comment and/or correction? | N/A. Evaluation comments were collated and feedback to the team at the next face-to-face meeting to permit discussion and clarification.                                                                                                                                                                                                                                                                                                                                                                                                                                                                                                                                                                                                                                                                                                                                                 |

|                                                                                                                                                            |  |                                                                                                                                                                                                 |
|------------------------------------------------------------------------------------------------------------------------------------------------------------|--|-------------------------------------------------------------------------------------------------------------------------------------------------------------------------------------------------|
| <b>Domain 3: analysis and findings</b>                                                                                                                     |  |                                                                                                                                                                                                 |
| <b>Data analysis</b>                                                                                                                                       |  |                                                                                                                                                                                                 |
| 24. Number of data coders How many data coders coded the data?                                                                                             |  | All the evaluation feedback was reviewed by the four members of the training team and the findings summarised into 'what worked', 'what didn't work' and 'what the team would like to do next'. |
| 25. Description of the coding tree Did authors provide a description of the coding tree?                                                                   |  | N/A                                                                                                                                                                                             |
| 26. Derivation of themes Were themes identified in advance or derived from the data?                                                                       |  | N/A                                                                                                                                                                                             |
| 27. Software What software, if applicable, was used to manage the data?                                                                                    |  | No software was used                                                                                                                                                                            |
| 28. Participant checking Did participants provide feedback on the findings?                                                                                |  | Evaluation feedback was presented back to the team for discussion and clarification.                                                                                                            |
| <b>Reporting</b>                                                                                                                                           |  |                                                                                                                                                                                                 |
| 29. Quotations presented Were participant quotations presented to illustrate the themes / findings? Was each quotation identified? e.g. participant number |  | Yes – quotations have a descriptor that is non-identifiable of individuals.                                                                                                                     |
| 30. Data and findings consistent Was there consistency between the data presented and the findings?                                                        |  | Yes.                                                                                                                                                                                            |
| 31. Clarity of major themes Were major themes clearly presented in the findings?                                                                           |  | N/A                                                                                                                                                                                             |
| 32. Clarity of minor themes Is there a description of diverse cases or discussion of minor themes?                                                         |  | N/A.                                                                                                                                                                                            |

1  
2  
3  
4  
5  
6  
7  
8  
9  
10  
11  
12  
13  
14  
15  
16  
17  
18  
19  
20  
21  
22  
23  
24  
25  
26  
27  
28  
29  
30  
31  
32  
33  
34  
35  
36  
37  
38  
39  
40  
41  
42  
43  
44  
45  
46  
47  
48  
49

|  |  |
|--|--|
|  |  |
|  |  |

For peer review only

# BMJ Open

## Supporting the use of theory in cross-country health services research: A participatory qualitative approach using Normalisation Process Theory as an example

|                                 |                                                                                                                                                                                                                                                                                                                                                                                                                                                                                                                                                                                                                                                                                                                                                                                                                                                                                                                                                                                                                                                                                                                                                                                                                                                                                                                                                                                                                                                                                                                                                                                                                                                                                                                                                                                                                                                                                                                                                                                                                           |
|---------------------------------|---------------------------------------------------------------------------------------------------------------------------------------------------------------------------------------------------------------------------------------------------------------------------------------------------------------------------------------------------------------------------------------------------------------------------------------------------------------------------------------------------------------------------------------------------------------------------------------------------------------------------------------------------------------------------------------------------------------------------------------------------------------------------------------------------------------------------------------------------------------------------------------------------------------------------------------------------------------------------------------------------------------------------------------------------------------------------------------------------------------------------------------------------------------------------------------------------------------------------------------------------------------------------------------------------------------------------------------------------------------------------------------------------------------------------------------------------------------------------------------------------------------------------------------------------------------------------------------------------------------------------------------------------------------------------------------------------------------------------------------------------------------------------------------------------------------------------------------------------------------------------------------------------------------------------------------------------------------------------------------------------------------------------|
| Journal:                        | <i>BMJ Open</i>                                                                                                                                                                                                                                                                                                                                                                                                                                                                                                                                                                                                                                                                                                                                                                                                                                                                                                                                                                                                                                                                                                                                                                                                                                                                                                                                                                                                                                                                                                                                                                                                                                                                                                                                                                                                                                                                                                                                                                                                           |
| Manuscript ID                   | bmjopen-2016-014289.R3                                                                                                                                                                                                                                                                                                                                                                                                                                                                                                                                                                                                                                                                                                                                                                                                                                                                                                                                                                                                                                                                                                                                                                                                                                                                                                                                                                                                                                                                                                                                                                                                                                                                                                                                                                                                                                                                                                                                                                                                    |
| Article Type:                   | Research                                                                                                                                                                                                                                                                                                                                                                                                                                                                                                                                                                                                                                                                                                                                                                                                                                                                                                                                                                                                                                                                                                                                                                                                                                                                                                                                                                                                                                                                                                                                                                                                                                                                                                                                                                                                                                                                                                                                                                                                                  |
| Date Submitted by the Author:   | 28-Apr-2017                                                                                                                                                                                                                                                                                                                                                                                                                                                                                                                                                                                                                                                                                                                                                                                                                                                                                                                                                                                                                                                                                                                                                                                                                                                                                                                                                                                                                                                                                                                                                                                                                                                                                                                                                                                                                                                                                                                                                                                                               |
| Complete List of Authors:       | <p>O'Donnell, Kate; University of Glasgow, General Practice &amp; Primary Care<br/> Mair, Frances; University of Glasgow, General Practice and Primary Care<br/> Dowrick, CF; University of Liverpool, Institute of Psychology, Health and Society<br/> O'Reillyde Brun, Mary; NUI Galway, Discipline of General Practice<br/> de Brún, Tomas; NUI Galway, Discipline of General Practice<br/> Burns, Nicola; University of Glasgow, General Practice and Primary Care,<br/> Institute of Health &amp; Wellbeing, College of Medical, Veterinary and Life<br/> Sciences; Lancaster University, Lancaster Medical School, Faculty of Health<br/> and Medicine, Furness College<br/> Lionis, Christos; Medical Faculty, University of Crete, Greece,<br/> Saridaki, Aristeia; Medical Faculty, University of Crete, Greece<br/> Papadakaki, Maria; Technological Educational Institute of Crete,<br/> Department of Social Work; Medical Faculty, University of Crete, Greece<br/> van den Muijsenbergh, Maria; Radboud University Nijmegen Medical<br/> Centre, Department of Primary and Community Care; Pharos Centre of<br/> Expertise on Health Disparities<br/> van Weel-Baumgarten, Evelyn; Radboud University Nijmegen Medical<br/> Centre, Department of Primary and Community Care<br/> Gravenhorst, Katja; University of Liverpool, Institute of Psychology, Health<br/> and Society<br/> Cooper, Lucy<br/> Princz, Christine; Medical University of Vienna, Centre for Public Health<br/> Teunissen, Erik; Radboud university medical center, Department of Primary<br/> and Community Care, Nijmegen, Netherlands<br/> van den Driessen Mareeuw, Francine; Radboud university medical center,<br/> Department of Primary and Community Care, Nijmegen, Netherlands<br/> Vlachadi, Maria; University of Crete, Department of Political Sciences<br/> Spiegel, Wolfgang; Medical University of Vienna, Centre for Public Health<br/> Macfarlane, Anne; University of Limerick, Graduate Entry Medical School</p> |
| <b>Primary Subject Heading</b>: | Health services research                                                                                                                                                                                                                                                                                                                                                                                                                                                                                                                                                                                                                                                                                                                                                                                                                                                                                                                                                                                                                                                                                                                                                                                                                                                                                                                                                                                                                                                                                                                                                                                                                                                                                                                                                                                                                                                                                                                                                                                                  |
| Secondary Subject Heading:      | Research methods, Qualitative research                                                                                                                                                                                                                                                                                                                                                                                                                                                                                                                                                                                                                                                                                                                                                                                                                                                                                                                                                                                                                                                                                                                                                                                                                                                                                                                                                                                                                                                                                                                                                                                                                                                                                                                                                                                                                                                                                                                                                                                    |
| Keywords:                       | Theory, Training, Health services research, Normalisation Process Theory                                                                                                                                                                                                                                                                                                                                                                                                                                                                                                                                                                                                                                                                                                                                                                                                                                                                                                                                                                                                                                                                                                                                                                                                                                                                                                                                                                                                                                                                                                                                                                                                                                                                                                                                                                                                                                                                                                                                                  |
|                                 |                                                                                                                                                                                                                                                                                                                                                                                                                                                                                                                                                                                                                                                                                                                                                                                                                                                                                                                                                                                                                                                                                                                                                                                                                                                                                                                                                                                                                                                                                                                                                                                                                                                                                                                                                                                                                                                                                                                                                                                                                           |

1  
2  
3  
4  
5  
6  
7  
8  
9  
10  
11  
12  
13  
14  
15  
16  
17  
18  
19  
20  
21  
22  
23  
24  
25  
26  
27  
28  
29  
30  
31  
32  
33  
34  
35  
36  
37  
38  
39  
40  
41  
42  
43  
44  
45  
46  
47  
48  
49  
50  
51  
52  
53  
54  
55  
56  
57  
58  
59  
60

SCHOLARONE™  
Manuscripts

For peer review only

1  
2  
3 **Supporting the use of theory in cross-country health services research: A participatory qualitative**  
4  
5 **approach using Normalisation Process Theory as an example**  
6  
7

8  
9 **Catherine A O'Donnell<sup>1\*</sup>, Frances S Mair<sup>1</sup>, Christopher Dowrick<sup>2</sup>, Mary O'Reilly-de Brún<sup>3</sup>, Tomas de**  
10 **Brún<sup>3</sup>, Nicola Burns<sup>1,4</sup>, Christos Lionis<sup>5</sup>, Aristoula Saridaki<sup>5</sup>, Maria Papadakaki<sup>5,6</sup>, Maria van den**  
11 **Muijsenbergh<sup>7,8</sup>, Evelyn van Weel-Baumgarten<sup>7</sup>, Katja Gravenhorst<sup>2</sup>, Lucy Cooper<sup>2</sup>, Christine**  
12 **Princz<sup>9</sup>, Erik Teunissen<sup>7</sup>, Francine van den Driessen Mareeuw<sup>7</sup>, Maria Vlahadi<sup>5</sup>, Wolfgang Spiegel<sup>9</sup>,**  
13  
14  
15  
16  
17  
18 **and Anne MacFarlane<sup>10</sup>**  
19

- 20  
21  
22  
23 1. General Practice and Primary Care, Institute of Health and Wellbeing, College of MVLS, University  
24 of Glasgow, 1 Horselethill Road, Glasgow, Scotland, G12 9LX, UK  
25  
26  
27 2. Institute of Psychology, Health and Society, University of Liverpool, Waterhouse Building, Block B,  
28 1st Floor, 1-5 Brownlow Street, Liverpool, L69 3GL, UK  
29  
30  
31 3. Discipline of General Practice, School of Medicine, National University of Ireland, Galway, Ireland  
32  
33 4. Faculty of Health and Medicine, Lancaster Medical School, Furness College, University of  
34 Lancaster, Lancaster, UK  
35  
36  
37 5. Faculty of Medicine, University of Crete, Heraklion, Greece  
38  
39  
40 6. Department of Social Work, School of Health and Social Welfare, Technological Educational  
41 Institute of Crete, Heraklion, Crete  
42  
43  
44 7. Department of Primary and Community Care, Radboud University Nijmegen Medical Centre,  
45 Nijmegen, The Netherlands  
46  
47  
48 8. Pharos Centre of Expertise on Health Disparities, Utrecht, The Netherlands  
49  
50  
51 9. Centre for Public Health, Medical University of Vienna, Vienna, Austria  
52  
53 10. Graduate Entry Medical School, University of Limerick, Limerick, Ireland  
54

55 **\*Corresponding Author**

56 **Email: Kate.O'Donnell@glasgow.ac.uk; Tel: +44 141 330 8329.**  
57  
58  
59  
60

1  
2  
3  
4  
5  
6  
7  
8  
9  
10  
11  
12  
13  
14  
15  
16  
17  
18  
19  
20  
21  
22  
23  
24  
25  
26  
27  
28  
29  
30  
31  
32  
33  
34  
35  
36  
37  
38  
39  
40  
41  
42  
43  
44  
45  
46  
47  
48  
49  
50  
51  
52  
53  
54  
55  
56  
57  
58  
59  
60

For peer review only



## Abstract

**Objectives:** To describe and reflect on the process of designing and delivering a training programme supporting the use of theory, in this case Normalisation Process Theory (NPT), in a multi-site cross-country health services research study.

**Design:** Participatory research approach utilising qualitative methods.

**Setting:** Six European primary care settings involving research teams from Austria, England, Greece, Ireland, The Netherlands and Scotland.

**Participants:** RESTORE research team consisting of 8 project applicants, all senior primary care academics; and 10 researchers. Professional backgrounds included general practitioners/family doctors; social/cultural anthropologists; sociologists; health services/primary care researchers.

**Primary outcome measures:** Views of all research team members (n=18) were assessed using qualitative evaluation methods, analysed qualitatively by the trainers after each session.

**Results:** Most of the team had no experience of using NPT and many had not applied theory to prospective, qualitative research projects. Early training proved didactic and overloaded participants with information. Drawing on RESTORE's methodological approach of Participatory Learning and Action, workshops using role play, experiential interactive exercises and light-hearted examples not directly related to the study subject matter were developed. Evaluation showed the study team quickly grew in knowledge and confidence in applying theory to fieldwork.

Recommendations applicable to other studies include: accepting that theory application is not a linear process; that time is needed to address researcher concerns with the process; and that experiential, interactive learning is a key device in building conceptual and practical knowledge. An unanticipated benefit was the smooth transition to cross-country qualitative coding of study data.

**Conclusion** A structured programme of training enhanced and supported the prospective application of a theory, NPT, to our work, but raised challenges. These were not unique to NPT, but

1  
2  
3  
4  
5  
6  
7  
8  
9  
10  
11  
12  
13  
14  
15  
16  
17  
18  
19  
20  
21  
22  
23  
24  
25  
26  
27  
28  
29  
30  
31  
32  
33  
34  
35  
36  
37  
38  
39  
40  
41  
42  
43  
44  
45  
46  
47  
48  
49  
50  
51  
52  
53  
54  
55  
56  
57  
58  
59  
60

could arise with the application of any theory, especially in large multi-site, international projects.

The lessons learned are applicable to other theoretically-informed studies.

**Keywords**

Theory; Health services research; Training; Normalisation Process Theory.

For peer review only

### Strengths and Limitations

- The training programme was developed to support the use of a mid-level theory in 6 European countries with different primary care systems and cultures.
- Training development, delivery and evaluation engaged with a multidisciplinary team of clinical and non-clinical researchers encompassing multiple professional disciplines.
- Evaluation and careful monitoring of the training alerted us to delivery challenges and facilitated the development of a participatory approach to learning.
- The group of researchers involved in the design and feedback evaluation was relatively small.
- Training focused on one theory – Normalisation Process Theory – but has resulted in a set of generic recommendations.

## Introduction

Bridging the research to practice gap is a recognised problem in health services research.<sup>12</sup> One important solution is to underpin such research with strong theoretical approaches.<sup>134</sup> Advantages include providing a framework that is generalizable across settings and individuals; incremental generation of knowledge; and a guide for analysis.<sup>356</sup> Theory can also enhance our understanding of the barriers to research translation and implementation and alert us to the context into which new interventions and services are placed.<sup>6-9</sup> However, many interventions and services are implemented with little or no attention to theory.<sup>35</sup> When theories are used, they often guide analysis rather than inform the design and conduct of the overall study.<sup>51011</sup> This may be due, in part, to recognised challenges in applying theory to health services research.

## Challenges in using theory in health services research

The first challenge is a lack of conceptual clarity as to what a 'theory' is. MacDonald describes theory as "an organized, heuristic, coherent, and systematic articulation of a set of statements related to significant questions ..... providing a generalizable form of understanding".<sup>12</sup> There are three recognised levels of 'theory'. Grand theory is abstract and broadly applicable across different areas and subjects.<sup>61213</sup> The next level – mid-range or 'big theory' – is less abstract, addressing specific phenomena and concepts that can be incorporated into testable propositions or questions and inform intervention development.<sup>612</sup> The third level, programme theory, is often considered as 'small' theory, specifying particular components of an intervention in logic models and explicitly linking a programme's processes and inputs to its intended outcomes.<sup>614</sup>

The second challenge is to decide which theory best informs the work being conducted. For example, theory can focus on: explaining individual behaviours and responses (e.g. Theory of Planned Behaviour); understanding organisational responses (e.g. Diffusion of Innovation); dissemination (e.g. Streams of Policy Process); or implementation (e.g. Promoting Action on

1  
2  
3 Research Implementation in Health Services or PARIHS).<sup>15</sup> While theoretical choice is informed by  
4  
5 the research, the disciplinary composition and background of the research team is also influential.<sup>16</sup>  
6  
7 <sup>17</sup> Health services research is often multidisciplinary and draws on many fields including sociology,  
8  
9 psychology, biostatistics, health economics and clinical disciplines. This requires teams to  
10  
11 understand and respect each other's theoretical and paradigmatic positions.<sup>3</sup> The final challenge is a  
12  
13 lack of guidance in applying theory to studies.<sup>7 18</sup>  
14  
15

### 16 17 18 19 **The application of theory in practice**

20  
21 Consideration has been given to how research teams could apply theory in practice. For example,  
22  
23 the Reach, Effectiveness, Adoption, Implementation and Maintenance (RE-AIM) framework was  
24  
25 developed for use in the evaluation of public health programmes and interventions but is now  
26  
27 widely applied.<sup>19 20</sup> RE-AIM focuses researchers' attention on: population reach; the intervention's  
28  
29 adoption, implementation and effectiveness; and, finally, on its maintenance in practice.<sup>20</sup> The  
30  
31 developers of Re-AIM have released training and support for other researchers (<http://www.re-aim.hnfe.vt.edu/>). However, even with such training available, it is not always applied consistently.  
32  
33  
34  
35  
36 Gaglio identified 71 papers published between 1999-2010 that used RE-AIM;<sup>20</sup> of these, 'reach' was  
37  
38 the most frequently reported dimension, with 'maintenance' reported least often. There was also  
39  
40 variation in the reporting of the individual components of each construct. Most reporting was  
41  
42 quantitative, with little qualitative research to explore how components were used or understood.  
43  
44  
45  
46 Similar results were reported for the PARIHS framework, which describes several interacting  
47  
48 components including clinical and patient experience; local context; culture and leadership; and  
49  
50 facilitation.<sup>21</sup> Again, there was variation in its use across studies, with a lack of detail on the  
51  
52 application of different sub-components to fieldwork.<sup>18 22</sup> Two other reviews examined the  
53  
54 application of the Knowledge to Action (KTA) Framework<sup>23</sup> and Normalisation Process Theory<sup>24</sup> to  
55  
56 implementation studies. In both, the authors found stability in the application of the high level  
57  
58  
59  
60

1  
2  
3 constructs across studies but, again, variation in researchers' attention to the sub-constructs of  
4  
5 each. This lack of 'theory fidelity' has been raised in other fields, notably health promotion.<sup>23 25</sup>  
6  
7

8 Translating the constructs of a chosen theory into interventions can be challenging, especially when  
9  
10 applied across multiple research sites.<sup>5 7 23</sup> Research teams must be comfortable and aligned with the  
11  
12 use of the selected theory and in agreement about the meaning and application of its individual  
13  
14 components or constructs. Such challenges are enhanced when teams are working in different  
15  
16 settings, countries and across cultural and language boundaries as construct understanding and  
17  
18 implementation are likely to be both culturally and context-dependent. This mirrors challenges  
19  
20 identified in conducting qualitative research across different settings.<sup>26</sup> These challenges faced the  
21  
22 EU-funded RESTORE project, a multi-site implementation study across six European countries (Box  
23  
24 1).<sup>27</sup> Focused on cross-cultural communication in primary care, the design and analysis of RESTORE  
25  
26 was underpinned throughout by a recognised mid-level, sociological theory - Normalisation Process  
27  
28 Theory (NPT). However, the application of theory to a research study was a new concept for many  
29  
30 members of the team. As a result, we had to develop a training programme to familiarise and  
31  
32 support the team in this process.  
33  
34  
35

36 The aim of this paper is to describe and reflect on the process of designing training in the use of  
37  
38 theory in a multi-site cross-country research project. We discuss the challenges this brought, as well  
39  
40 as the benefits. Finally, we make recommendations that could be applied to other theoretically-  
41  
42 driven health services research located in multiple settings, regardless of the theory selected.  
43  
44  
45  
46  
47  
48  
49  
50  
51  
52  
53  
54  
55  
56  
57  
58  
59  
60

**Box 1. Description of the RESTORE project and its underpinning theory, Normalisation Process****Theory.<sup>27</sup>**

RESTORE (**RE**search into implementation **ST**ratgies to support patients of different **OR**igins and **language background**) was focused on the implementation of guidance and training initiatives to support cross-cultural consultations in primary care for vulnerable migrant populations: asylum seekers and refugees; migrants in low paid employment; and undocumented migrants.<sup>27 28</sup> Funded by the EU FP7 Programme, RESTORE aimed to bridge the research-practice gap by collecting empirical data on the selection, co-design and implementation of such interventions in five European primary care settings: Austria, England, Greece, Ireland, and the Netherlands. A sixth partner, Scotland, focused on the role of the policy environment and health systems of participating countries.<sup>29</sup>

RESTORE used a participatory research approach – Participatory Learning and Action (PLA) – as its over-arching methodological approach, generating rich, in-depth qualitative data.<sup>27 30 31</sup> This involved a range of stakeholders including primary care practitioners, migrant service users, community interpreters and policy makers. To shape the study approach, facilitate data collection and guide the analysis, a robust theoretical approach was essential. For this, we selected Normalisation Process Theory (NPT), a mid-range sociological theory concerned with the work that individuals and organisations have to carry out in order to embed and normalise new, complex ways of working into routine practice.<sup>32 33</sup> NPT operates through four principal constructs or areas of work: coherence (sense-making work); cognitive participation (engagement work); collective action (enacting work); and reflexive monitoring (appraisal work), each with its own set of sub-constructs. NPT has been applied to a range of studies,<sup>24</sup> including guideline implementation,<sup>34 35</sup> treatment burden in chronic disease<sup>36-38</sup> and evaluating models of care.<sup>8 39</sup>

## Methods

### RESTORE study design

RESTORE was designed and implemented in three stages over 48 months (Figure 1).<sup>27</sup> Stage 1 identified and recruited key stakeholders in each country, including migrants, community interpreters, primary care practitioners and local policy-makers. An extensive mapping exercise was conducted by each in-country RESTORE team to identify guidance and training initiatives (G/TIs) supporting inter-cultural communication in primary care and to assess their initial suitability for implementation<sup>40</sup>. Stage 2 focused on engaging with local stakeholders to review the identified G/TIs and democratically select one for implementation by considering the implementation potential of each G/TI.<sup>41</sup> In Stage 3, the selected G/TI was refined by local stakeholders supported by the in-country RESTORE team, implemented by the stakeholders and RESTORE team, monitored and, where necessary, further refined to improve the chances of sustaining it in routine practice.

INSERT FIGURE 1 HERE.

Although not entirely linear, the study was designed to broadly align to the four constructs of NPT (Figure 2). Stage 1 focused on familiarisation, first on the broad need to apply theory to RESTORE and then, with NPT itself. Stage 2 mapped to coherence and cognitive participation; Stage 3 mapped to collective action and reflexive monitoring. This structure then influenced the design of the training for the team, which is described below.

INSERT FIGURE 2 HERE.

### The RESTORE Team

The research team of 18 included research and clinical disciplines, with a wide range of expertise and knowledge of the chosen theoretical approach (Supplementary File 1). Three country teams (Austria, Greece and the Netherlands) had no experience of using NPT. Four team members (MacFarlane,



1  
2  
3 Mair, Dowrick and O'Donnell) had extensive experience of using NPT<sup>39 42-44</sup> including applying NPT  
4  
5 prospectively to complex interventions.<sup>29 45-47</sup> These four team members thus formed the NPT  
6  
7 trainers group, leading the development and delivery of the training reported here.  
8  
9

### 10 11 12 **Description of the training programme**

13  
14  
15 Face-to-face training sessions each lasted one day. Training content was initially developed by the  
16  
17 NPT trainers based on our knowledge of the content that needed to be covered. As time progressed,  
18  
19 however, the content was developed based on feedback and evaluation from the RESTORE team  
20  
21 members. Here we briefly describe the content of the training sessions. More detailed description of  
22  
23 the training sessions and the participatory exercises are contained in Supplementary Files 2 and 3;  
24  
25 the short presentations can be accessed on Slideshare (see Supplementary File 4 for links).  
26  
27  
28  
29  
30

### 31 ***Early project training (Months 1 to 12).***

32  
33  
34 Training began at Month 8, after the RESTORE researchers had been appointed in each country. In  
35  
36 the first session, the rationale for using theory to shape and inform research study design, data  
37  
38 collection and analysis was presented. NPT, the theory chosen to underpin RESTORE, was then  
39  
40 introduced using previous studies as examples as well as the on-line NPT toolkit  
41  
42 (<http://www.normalizationprocess.org/>). Following this, an interactive group exercise helped the  
43  
44 research team to consider what issues might arise during the implementation of professional  
45  
46 interpreters in primary care. To prompt discussion and improve understanding, the team used a set  
47  
48 of 16 NPT-informed questions developed by the NPT trainers along with TdeB. These questions were  
49  
50 also being used to guide the early stages of data analysis in the project (Table 1).<sup>31 41</sup>  
51  
52  
53  
54  
55  
56  
57  
58  
59  
60

1  
2  
3  
4  
5  
6  
7  
8  
9  
10  
11  
12  
13  
14  
15  
16  
17  
18  
19  
20  
21  
22  
23  
24  
25  
26  
27  
28  
29  
30  
31  
32  
33  
34  
35  
36  
37  
38  
39  
40  
41  
42  
43  
44  
45  
46  
47  
48  
49

Table 1. NPT constructs and sub-constructs as applied to RESTORE<sup>31 41</sup>

| Coherence                                                                                                      | Cognitive Participation                                                                                             | Collective Action                                                                                                         | Reflexive Monitoring                                                                                                |
|----------------------------------------------------------------------------------------------------------------|---------------------------------------------------------------------------------------------------------------------|---------------------------------------------------------------------------------------------------------------------------|---------------------------------------------------------------------------------------------------------------------|
| Can stakeholders make sense of the intervention?                                                               | Can stakeholders get others involved in implementing the intervention?                                              | What needs to be done to make the intervention work in practice?                                                          | Can the intervention be monitored and evaluated?                                                                    |
| <b>Differentiation:</b><br>Do stakeholders see this as a new way working?                                      | <b>Enrolment:</b><br>Do the stakeholders believe they are the correct people to drive forward the implementation?   | <b>Interactional workability:</b><br>Does the intervention make it easier or harder to complete tasks?                    | <b>Systematisation:</b><br>Will stakeholders be able to judge the effectiveness of the intervention?                |
| <b>Individual specification:</b><br>Do individuals understand what tasks the intervention requires of them?    | <b>Initiation:</b><br>Are they willing and able to engage others in the implementation?                             | <b>Skill set workability:</b><br>Do those implementing the intervention have the correct skills and training for the job? | <b>Individual appraisal:</b><br>How will individuals judge the effectiveness of the intervention?                   |
| <b>Communal specification:</b><br>Do all those involved agree about the purpose of the intervention?           | <b>Activation:</b><br>Can stakeholders identify what tasks and activities are required to sustain the intervention? | <b>Relational integration:</b><br>Do those involved in the implementation have confidence in the new way of working?      | <b>Communal appraisal:</b><br>How will stakeholders collectively judge the effectiveness of the intervention?       |
| <b>Internalisation:</b><br>Do all the stakeholders grasp the potential benefits and value of the intervention? | <b>Legitimation:</b><br>Do they believe it is appropriate for them to be involved in the intervention?              | <b>Contextual integration:</b><br>Do local and national resources and policies support the implementation?                | <b>Reconfiguration:</b><br>Will stakeholders be able to modify the intervention based on evaluation and experience? |

1  
2  
3 ***Mid-project training (Months 13 to 24).***  
4

5 At month 13, we focused on the NPT constructs of coherence (sense-making) and cognitive  
6 participation (engagement). Learning from early training, we first used a non-RESTORE 'light'  
7 example with a humorous exercise which all the team could relate to – namely, could you  
8 contemplate staying in a circus tent at a future RESTORE team meeting? (Figure 3)  
9

10  
11  
12  
13  
14  
15 INSERT FIGURE 3 HERE  
16

17 Following this, a RESTORE specific role play was employed to think through the issues of using  
18 professional interpreters in a primary care setting; this example drew on team members' own  
19 experiences of working with interpreters. Although this was designed to focus the discussion on  
20 issues relating to coherence and cognitive participation, issues relating to collective action and  
21 reflexive monitoring also arose (see Results).  
22  
23  
24  
25  
26  
27

28 By month 20, when the next face-to-face training took place, the in-country teams were preparing to  
29 commence fieldwork with their stakeholders (Stage 2 of RESTORE). Teams were given another  
30 opportunity to participate in an interactive role play. For this, a G/TI selected by one of the in-  
31 country RESTORE teams in collaboration with their stakeholders was used; some members of the  
32 RESTORE team were asked to role play the kind of discussions they might encounter in their  
33 fieldwork. The issues and questions that arose during this were recorded and mapped to the four  
34 NPT constructs by the other team members, using large wall charts and stickie notelets. The  
35 resultant mapping was then reviewed by the NPT trainers and discussed by the group.  
36  
37  
38  
39  
40  
41  
42  
43  
44  
45  
46  
47  
48

49 ***Later training sessions (Months 25 to 40).***  
50

51 By month 25, teams were conducting fieldwork and moving into Stage 3, where the chosen G/TI  
52 would be fully adapted, implemented and the result of that implementation monitored. (This  
53 process and the results are reported in two recent RESTORE project papers.<sup>41 48</sup>) Teams were now  
54  
55  
56  
57  
58  
59  
60

1  
2  
3 generating qualitative data about that process, which required the development of a coding  
4  
5 framework broadly applicable across all the participating sites. Thus, training focused both on the  
6  
7 constructs of collective action and reflexive monitoring and on the process of analysis.  
8  
9

10 To begin training in analysis, an anonymised extract of data generated from RESTORE fieldwork in  
11  
12 Ireland was selected. This was pre-circulated to the teams for coding to the four constructs and, if  
13  
14 possible, to the sub-constructs. In addition to team coding, the extract was sent to the trainers and  
15  
16 to three recognised external experts in NPT. Coded data were collated and presented at the  
17  
18 Consortium training at Month 25.  
19

20  
21 Training sessions at Months 38 and 43 continued to focus on analysis. Teams were asked to review  
22  
23 extracts of data or to bring examples of coding dilemmas with them. Coding dilemmas included  
24  
25 examples of data that researchers were concerned were being miscoded; data that did not appear  
26  
27 to fit into the NPT framework; and data that appeared to be particular to only one site. Evaluation at  
28  
29 the end of these later sessions allowed the NPT trainers to clarify the team's understanding of the  
30  
31 coding process and to address any on-going concerns through teleconferences or email.  
32  
33  
34  
35  
36

### 37 **Non face-to-face support**

38  
39 Several mechanisms were put into place to support teams in-between face-to-face sessions,  
40  
41 including buddy groups (linking teams experienced in theory use with less experienced teams);  
42  
43 telephone and video conferences; email feedback on issues and problems. Later in the project,  
44  
45 telephone and video conferences were also used to support data analysis, promoting consistency in  
46  
47 the application of theory to analysis across the participating countries.  
48  
49

50  
51 Outside the formal training sessions, we uploaded NPT relevant information such as key papers and  
52  
53 links to the NPT Toolkit website ([www.normalizationprocess.org](http://www.normalizationprocess.org)) to a shared folder accessible by all  
54  
55 the research team to serve as a resource whenever required.  
56  
57  
58  
59  
60

### Evaluation of the NPT training content

Face-to-face training was evaluated qualitatively at the end of each training day. Everyone present at the training days (generally all 18 members of the research team) participated in each evaluation; no one refused to participate. Methods included: written lists of the 3 most positive and 3 most negative features of the training; speed evaluation where each participant was given two minutes to verbally record which aspects of training had, or had not, been effective for them; scoring elements of the training on a Likert scale (e.g. from 1 = very poor to 5 = very good). These data were collected either as short written comments or recorded on a digital recorder. Additional evaluation was conducted approximately three weeks after the first session, when the team were emailed a short set of questions asking what had worked well; what had not worked well; and what they wanted from future training sessions. All the evaluation feedback was reviewed by the four members of the training team and the findings summarised into 'what worked', 'what didn't work' and 'what the team would like to do next'. The results of the evaluations were then summarised and presented back to the full team at the next face-to-face RESTORE Consortium meeting, providing the team with a further opportunity to comment on whether they believed all the key issues or suggestions regarding training had been captured and addressed.

### Results

#### *Early project training (Months 1 to 12).*

Team evaluation indicated that the content of the first training sessions (Sessions 1 and 2, Supplementary File 2) was too didactic and prescriptive. The team felt overwhelmed trying to assimilate general knowledge about the application of theory to research along with NPT-specific information. The early use of the 16 NPT sensitising questions (Table 1) was not well liked by some researchers used to more inductive methods of working in qualitative projects. Others, particularly

1  
2  
3 the clinicians, found this approach helpful as they tried to develop their understanding of the  
4  
5 theory's different constructs.  
6

7  
8 *The 16 questions of the [NPT] toolkit gave us a better insight into what was meant by terms*  
9  
10 *like 'sense-making' 'participation' 'action' and 'monitoring'. (Buddy report from Dutch and*  
11  
12 *English teams).*  
13

### 14 15 16 17 **Mid-project training (Months 13 to 24).** 18

19  
20 As a result of team feedback on the didactic nature of the first sessions, the NPT trainers adopted a  
21  
22 more PLA-focused style for the mid-project training sessions. This also reflected the methodological  
23  
24 approach of the RESTORE project in the field, as described elsewhere.<sup>27 31</sup> Consequently, later  
25  
26 sessions had one or at most two short didactic presentations, with the remaining time spent on  
27  
28 participatory exercises. The mid-project training content was aligned more closely to the temporal  
29  
30 arrangement of the project itself and linked to the over-arching constructs of NPT. Thus, we focused  
31  
32 principally on sense-making (coherence) and engagement work (cognitive participation) first, before  
33  
34 turning to the actual work undertaken (collective action) and, finally, monitoring and appraisal work  
35  
36 (reflexive monitoring) (Figure 2).  
37

38  
39  
40 The use of a 'light' humorous exercise, the circus tent (Figure 3), where the team could concentrate  
41  
42 on the content of the theory without worrying about how it applied to future fieldwork evaluated  
43  
44 well. Exercises using practical examples grounded in the fieldwork they would have to conduct  
45  
46 during the course of the project were also helpful.  
47

48  
49 *Exercises helped a lot! Very comfortable now! (Anonymous response in written evaluation*  
50  
51 *feedback)*

52  
53 *Worked well. I'm beginning to see sense. The use of PLA methods/ techniques really helps*  
54  
55 *grasping NPT and made it digestible! (Anonymous response in written evaluation feedback)*  
56  
57  
58  
59  
60

1  
2  
3 Interactive exercises and role play designed to focus on coherence and cognitive participation also  
4  
5 spontaneously picked up issues relating to collective action (who would actually do the work; how  
6  
7 would it be funded) and reflexive monitoring (how would teams know if professional interpreters  
8  
9 had an impact). This served as an important reminder that, even when NPT sensitising questions  
10  
11 from researchers were designed to focus on sense-making and engagement, other issues would  
12  
13 naturally emerge in the discussion, emphasising the lack of linearity in the application of theory to  
14  
15 data generation. This was reflected in feedback obtained from two of the in-country teams.  
16  
17

18  
19 *Coherence and cognitive participation refer, in the main, to processes before any*  
20  
21 *implementation work has occurred. However, we did note that the theory is fluid and not fixed*  
22  
23 *or linear, so this means that the experience of doing the implementation work (collective*  
24  
25 *action) and reflecting on that work (reflexive monitoring) could influence coherence and*  
26  
27 *cognitive participation over time..... An 'aha!' moment occurred when we distilled the thinking*  
28  
29 *in the group around the difference between cognitive participation and collective action as*  
30  
31 *'thinking about the doing' and 'doing the doing' (Buddy Report from Greek and Irish teams).*  
32  
33

#### 34 35 36 37 **Later training sessions (Months 25 to 40).**

38  
39 Training conducted later in the project steadily moved from using theory to inform the collection of  
40  
41 data in the field to using theory to underpin analysis of data. Face-to-face training session at Months  
42  
43 25 and 31 focused mainly on coding data extracts and on round-table discussion of the approach  
44  
45 being taken. Prior to meeting at month 25, teams received an extract of data generated by the Irish  
46  
47 team (Box 2); teams were asked to code this to the main constructs and, if possible, sub-constructs  
48  
49 of NPT. Coding was then compared at the training session in Month 25.  
50  
51  
52  
53  
54  
55  
56  
57  
58  
59  
60

**Box 2. Background to data generation by Irish team.**

MORdeB and TdeB developed training materials to support the RESTORE researchers use the methods of PLA in their fieldwork. One of these was a DVD in which researchers in Ireland role-played a discussion amongst health care professionals, policy makers, migrants' representatives and interpreters about the implementation of a training initiative to support the use of trained interpreters in primary care consultations in Ireland. Researchers were assigned these roles; the facilitator was one of RESTORE's PLA experts. The role play was filmed and the dialogue transcribed to allow teams to review and develop experience in applying NPT to coding data. This PLA training will be described more fully in future publications.

Table 2 shows examples of coding from two of the in-country teams, along with the final coding agreed by the whole RESTORE team. The first coding extract was selected because the data focused mainly on the construct of coherence, i.e. developing an understanding of the rationale for using interpreters in practice and the benefits of that. Overall, there was a high level of agreement between the team in their data coding, particularly when coding to the high-level constructs of NPT. Each in-country team showed a good degree of consistency in coding to the construct of Coherence, with some coding in particular to the sub-constructs of Differentiation ('seeing interpreters as a new way of working') and Internalisation ('articulating the benefits of working with interpreters'). The Dutch team also coded this portion of transcript to the construct Cognitive Participation, suggesting that the conversation was also discussing the need to enrol others into working with interpreters (Table 2). Face-to-face discussion at Month 25 led to a shared understanding and agreement that – where data was referring to both understanding the use of interpreters *and* considering who should be involved – then it was appropriate to double code data to both Coherence and Cognitive Participation. Likewise, where resources were referred to, for example the provision of training and DVD materials, text could be coded to Collective Action (Contextual Integration). Such discussions both helped the team refine their understanding of NPT, but also resulted in a robust coding framework which could be used across all country teams.



1  
2  
3 This process continued at later training meetings, at months 31 and 38 supplemented by telephone  
4  
5 and video conferences, where coding of data was compared and differences in interpretation  
6  
7 discussed. To facilitate this process, each country team nominated one person to lead on coding  
8  
9 qualitative data generated in that country, who then worked with the leads in the other countries to  
10  
11 review and discuss coding. Examples of coding were discussed and memos relating to data coding  
12  
13 circulated across the team, ensuring consistency of meaning and interpretation in relation to coding  
14  
15 data. The final coding frame was then reviewed and discussed at a final training meeting involving all  
16  
17 members of the RESTORE team which took place at month 43.  
18  
19  
20  
21  
22  
23  
24  
25  
26  
27  
28  
29  
30  
31  
32  
33  
34  
35  
36  
37  
38  
39  
40  
41  
42  
43  
44  
45  
46  
47  
48  
49  
50  
51  
52  
53  
54  
55  
56  
57  
58  
59  
60

Table 2. Coding example from a transcript: coding by in-country team and final coding after discussion

| Speaker                        | Text                                                                                                                                                                                                                                                                                                                                                                                                          | NPT Coding                                                                                                                                                                                          |
|--------------------------------|---------------------------------------------------------------------------------------------------------------------------------------------------------------------------------------------------------------------------------------------------------------------------------------------------------------------------------------------------------------------------------------------------------------|-----------------------------------------------------------------------------------------------------------------------------------------------------------------------------------------------------|
| <b>Coding from Irish Team.</b> |                                                                                                                                                                                                                                                                                                                                                                                                               |                                                                                                                                                                                                     |
| Facilitator                    | So when we began this, this morning [name] as the policy person you made a very interesting comment and you started the whole ball rolling with this didn't you?                                                                                                                                                                                                                                              |                                                                                                                                                                                                     |
| Policy maker*                  | Yeah, I suppose just reflecting on where we are at, at the moment within the health organisation is that we have a ban on travel and there's an embargo on education and <u>training initiatives</u> .                                                                                                                                                                                                        | Coded this text to <b>Coherence (Internalisation)</b> – understands the initiative; sees benefit in it.                                                                                             |
|                                | So something like this that provides a DVD, training and guidance is a major plus. It's something that's really going to tick the boxes for us whilst be very meaningful for front line staff as well                                                                                                                                                                                                         | Underlined text double coded to <b>Collective Action (Contextual Integration)</b> due to mention of training.                                                                                       |
| Facilitator                    | Okay so it's got two real advantages there, it's going to get over the problem you have about not being able to travel, not being able to go out and do the capacity building and training because it hands it to you right on the plate, as you see it. And also it's going to be very meaningful for front line staff, and if I remember [name] you found that interesting. You had a comment about that... |                                                                                                                                                                                                     |
| GP*                            | Yeah I think this was mine here, so as a GP I really liked the fact that there was a resource available to me as a front line member of staff, <u>a resource available to me which answers a lot of the questions that I have about using interpreters in my practice and how that might work.</u> So I found that very helpful.                                                                              | Coded text to <b>Coherence (Internalisation)</b> – sees benefit in this initiative.<br>Underlined text double coded to <b>Coherence (Differentiation)</b> as this seems to be a new way of working. |
| Facilitator                    | So that's a real positive for you about this particular training initiative. Okay and who else has comments here that they'd like to read out to us and remind us about? There's quite a few here.                                                                                                                                                                                                            |                                                                                                                                                                                                     |

|    |                               |                                                                                                |                                             |
|----|-------------------------------|------------------------------------------------------------------------------------------------|---------------------------------------------|
| 1  |                               |                                                                                                |                                             |
| 2  |                               |                                                                                                |                                             |
| 3  |                               |                                                                                                |                                             |
| 4  |                               |                                                                                                |                                             |
| 5  | Interpreter*                  | Yeah I think that one there [name] that you pointed to is my one and as an interpreter         | Text coded to Coherence –                   |
| 6  |                               | I felt that this package was particularly relevant because it gives special attention to       | understands initiative and sees             |
| 7  |                               | the Irish context and I feel that that's very important for me in my role as an                | benefit of it.                              |
| 8  |                               | interpreter. <u>And that you know for interpreters working in Ireland that its just very</u>   | Underlined text double coded to             |
| 9  |                               | <u>useful, I don't think this has been done before.</u>                                        | <b>Coherence (Differentiation)</b> as this  |
| 10 |                               |                                                                                                | seems to be a new way of working.           |
| 11 |                               |                                                                                                |                                             |
| 12 |                               |                                                                                                |                                             |
| 13 |                               |                                                                                                |                                             |
| 14 | <b>Coding from Dutch Team</b> |                                                                                                |                                             |
| 15 | Facilitator                   | So when we began this, this morning [name] as the policy person you made a very                |                                             |
| 16 |                               | interesting comment and you started the whole ball rolling with this didn't you?               |                                             |
| 17 |                               |                                                                                                |                                             |
| 18 | Policy maker*                 | Yeah, I suppose just reflecting on where we are at, at the moment within the health            | Text coded to <b>Coherence</b> .            |
| 19 |                               | organisation is that we have a ban on travel and there's an embargo on education and           | Underlined text double coded to             |
| 20 |                               | training initiatives.                                                                          | <b>Cognitive Participation</b> , as need to |
| 21 |                               | So something like this that provides a DVD, training and guidance is a major plus. <u>It's</u> | engage frontline staff.                     |
| 22 |                               | <u>something that's really going to tick the boxes for us whilst be very meaningful for</u>    |                                             |
| 23 |                               | <u>front line staff as well</u>                                                                |                                             |
| 24 |                               |                                                                                                |                                             |
| 25 | Facilitator                   | Okay so it's got two real advantages there, it's going to get over the problem you have        |                                             |
| 26 |                               | about not being able to travel, not being able to go out and do the capacity building          |                                             |
| 27 |                               | and training because it hands it to you right on the plate, as you see it. And also it's       |                                             |
| 28 |                               | going to be very meaningful for front line staff, and if I remember [name] you found           |                                             |
| 29 |                               | that interesting. You had a comment about that...                                              |                                             |
| 30 |                               |                                                                                                |                                             |
| 31 | GP*                           | Yeah I think this was mine here, so as a GP I really liked the fact that there was a           | Text coded to <b>Cognitive</b>              |
| 32 |                               | resource available to me as a front line member of staff, a resource available to me           | <b>Participation</b> as this was            |
| 33 |                               | which answers a lot of the questions that I have about using interpreters in my                | interpreted by Dutch team as                |
| 34 |                               | practice and how that might work. So I found that very helpful.                                | focusing on the individual's                |
| 35 |                               |                                                                                                | willingness to engage with                  |
| 36 |                               |                                                                                                | interpreters.                               |
| 37 |                               |                                                                                                |                                             |
| 38 | Facilitator                   | So that's a real positive for you about this particular training initiative. Okay and who      |                                             |
| 39 |                               | else has comments here that they'd like to read out to us and remind us about?                 |                                             |
| 40 |                               | There's quite a few here.                                                                      |                                             |
| 41 |                               |                                                                                                |                                             |
| 42 |                               |                                                                                                |                                             |
| 43 |                               |                                                                                                |                                             |
| 44 |                               |                                                                                                |                                             |
| 45 |                               |                                                                                                |                                             |
| 46 |                               |                                                                                                |                                             |
| 47 |                               |                                                                                                |                                             |
| 48 |                               |                                                                                                |                                             |
| 49 |                               |                                                                                                |                                             |

1  
2  
3  
4  
5  
6  
7  
8  
9  
10  
11  
12  
13  
14  
15  
16  
17  
18  
19  
20  
21  
22  
23  
24  
25  
26  
27  
28  
29  
30  
31  
32  
33  
34  
35  
36  
37  
38  
39  
40  
41  
42  
43  
44  
45  
46  
47  
48  
49

Interpreter\*

Yeah I think that one there [name] that you pointed to is my one and as an interpreter I felt that this package was particularly relevant because it gives special attention to the Irish context and I feel that that's very important for me in my role as an interpreter. And that you know for interpreters working in Ireland that its just very useful, I don't think this has been done before.

First part coded to **Coherence** – focused on understanding and a new way of working.  
Underlined text double coded to **Cognitive Participation** – focused on buy-in and engagement with interpreters.

**Final coding after face-to-face discussion**

Facilitator

So when we began this, this morning [name] as the policy person you made a very interesting comment and you started the whole ball rolling with this didn't you?

Policy maker\*

Yeah, I suppose just reflecting on where we are at, at the moment within the health organisation is that we have a ban on travel and there's an embargo on education and training initiatives.

Text coded to **Coherence** – trying to make sense of the training initiative; what makes it a new way or working.

So something like this that provides a DVD, training and guidance is a major plus. It's something that's really going to tick the boxes for us whilst be very meaningful for front line staff as well

Text coded to **Collective Action (Contextual Integration)** – refers to what is involved and the resources provided (DVD, training and guidance).  
Underlined text double coded to **cognitive participation** – consideration of other groups that need to be engaged with

Facilitator

Okay so it's got two real advantages there, it's going to get over the problem you have about not being able to travel, not being able to go out and do the capacity building and training because it hands it to you right on the plate, as you see it. And also it's going to be very meaningful for front line staff, and if I remember [name] you found that interesting. You had a comment about that...

GP\*

Yeah I think this was mine here, so as a GP I really liked the fact that there was a resource available to me as a front line member of staff, a resource available to me

Text coded to **Coherence** – reflects that this is a new way of working

1  
2  
3  
4  
5  
6  
7  
8  
9  
10  
11  
12  
13  
14  
15  
16  
17  
18  
19  
20  
21  
22  
23  
24  
25  
26  
27  
28  
29  
30  
31  
32  
33  
34  
35  
36  
37  
38  
39  
40  
41  
42  
43  
44  
45  
46  
47  
48  
49

which answers a lot of the questions that I have about using interpreters in my practice and how that might work. So I found that very helpful.

**(Differentiation)**; recognises the benefits **(Internalisation)**.

Facilitator

So that's a real positive for you about this particular training initiative. Okay and who else has comments here that they'd like to read out to us and remind us about? There's quite a few here.

Interpreter\*

Yeah I think that one there [name] that you pointed to is my one and as an interpreter I felt that this package was particularly relevant because it gives special attention to the Irish context and I feel that that's very important for me in my role as an interpreter. And that you know for interpreters working in Ireland that its just very useful, I don't think this has been done before.

Text coded to **Coherence (Differentiation)** – seen as a new way of working.

Text underlined double coded to **Collective Action (Contextual Integration)** – this refers to Irish context.

---

## Challenges

On-going telephone and email contact ensured that difficulties and tensions were quickly surfaced, particularly when theory was being applied to fieldwork. Training at month 20 began with an intensive de-briefing, where in-country teams were encouraged to freely discuss their concerns and challenges arising from using NPT. These focused on two, related, concerns. There was a continued lack of confidence in their knowledge of NPT itself and of being able to correctly map issues and data generated in the field to the NPT constructs. However, the use of visual methods of collecting and displaying data generated during the interactive group exercises, as exemplified in PLA approaches,<sup>31</sup> meant that the trainers could quickly identify a high degree of fidelity in the assignment of data to NPT constructs, thus reassuring the team of their knowledge development (Figure 4).

INSERT FIGURE 4 HERE

The second major issue reflected the disciplinary and epistemological differences within the research team. Some researchers were used to policy-related research, where the application of theory to data and the use of approaches such as Framework Analysis<sup>49</sup> were familiar. Others came from a sociological or anthropological background and were more comfortable with an inductive data-driven approach to analysis. This led to understandable concerns that data might be 'flattened' and shoe-horned into the NPT framework. To alleviate this concern, the trainers paid particular attention to the identification and recognition of coding which lay outside the NPT constructs, for example in relation to power dynamics between different stakeholders. A final concern was whether construct application and data generation, in the field, was linear or whether there were 'feedback loops'. For example, the research team considered the question of whether engaging in the work of implementing a G/TI could increase participants understanding or 'coherence' in relation to that G/TI? Training, therefore, continuously emphasised the lack of linearity in the process of applying theory to both data collection and analysis and encouraged the researchers to think through how this would affect data collection in the field.

## Discussion

### *Principal findings and their relation to other work*

We have described our approach to applying a mid-level sociological theory – Normalisation Process Theory – to a multi-site cross-country research study, RESTORE. In our endeavour to use NPT to shape our overall implementation journey, including data collection as well as analysis, we had to develop iterative and flexible training to support our multi-disciplinary, cross-national project team. While this presented challenges, we believe it also strengthened and added value to our work, ensuring it was designed, implemented and analysed in a robust and consistent manner across all five countries in which empirical data collection was conducted.

A multi-disciplinary, multi-national team inevitably has differences in terms of understanding the process of qualitative research and the use of theory. Professional and cultural perspectives impact on both individual and collective comfort (both in terms of country and professional discipline) with the concept of using theory to inform the design and conduct of a largely qualitative, implementation study. For example, researchers used to a more inductive approach to data analysis were initially cautious of an approach that applied theory to data analysis. The design of a robust programme of training, which acknowledged and discussed these perspectives during the course of the training, was challenging but also allowed the team to reach a shared understanding of what the study was trying to achieve. The benefits of surfacing these tensions became apparent as the training moved to the process of data analysis.

From our experience of developing training for using NPT, we have developed a series of generic recommendations that can be applied to other studies seeking to use theory in health services research (Table 3).

**Table 3. Recommendations for the future development of training to support the use of theory in health services research**

|                                                                                                                                               |
|-----------------------------------------------------------------------------------------------------------------------------------------------|
| 1. The application of theory to study design and fieldwork is not linear and training must acknowledge this                                   |
| 2. Experiential learning and the use of interactive, participatory and visual approaches are an important learning device.                    |
| 3. Training can be most effective when it focuses on the high level constructs of a theory.                                                   |
| 4. Different disciplinary backgrounds must be acknowledged and welcomed.                                                                      |
| 5. Space is required in the training programme to acknowledge and address researcher concerns.                                                |
| 6. Training in the application of theory can support the development and robustness of qualitative coding, especially for multi-site studies. |

A key recommendation is to acknowledge, from the beginning of training, that theory is not linear or sequential. This is often a challenge when applying theory to fieldwork; for example, Michie and colleagues have developed their Behaviour Change model as a wheel, in order to address any pre-conceived conceptions of 'linearity'.<sup>50</sup> The model of candidacy has also been criticised for an apparent linearity that is not found when applied in the field.<sup>51 52</sup> The nature and speed of fieldwork means it is important for researchers to be familiar with all constructs of a selected theory, in order to fully appreciate the theoretical relevance of the data as it is generated. Thus, training needs to both acknowledge and affirm the complexities of temporal order in prospective fieldwork and ensure that researchers are familiar with all the components of a theory early enough in the research study to ensure confidence when moving into fieldwork.

Team learning and understanding develops more rapidly and deeply by using participatory and experiential approaches to learning.<sup>31</sup> In our work, interactive exercises with visual methods of collecting data, role play and non-specific 'light' examples were all effective approaches to supporting learning and understanding. We strongly recommend this approach in the development of training for any complex theory that requires new users to develop an understanding of a range of



1  
2  
3 components. The second advantage of using multiple interactive exercises is as a means to check on  
4  
5 research team's 'theoretical fidelity' when analysing the data generated in the field.  
6

7  
8 Theoretical frameworks are often complex, with constructs which can themselves be broken down  
9  
10 to ever smaller sub-constructs. This level of complexity can be daunting for researchers new to the  
11  
12 theory being used and can lead to difficulties when coding data. Our experience suggests that a  
13  
14 focus on the high level constructs of a theory works best in the early stages of training. Once teams  
15  
16 have grasped and understood those, they can intuitively develop a deeper understanding of the  
17  
18 underlying sub-components.  
19

20  
21 Throughout our training programme, we allowed ample time for concerns to be raised and discussed  
22  
23 and for the team to develop solutions. An advantage of the time spent of training was apparent,  
24  
25 however, later in the project as we moved onto coding the qualitative data generated across  
26  
27 multiple sites. By then, the time spent in early training ensured that the team had a much clearer  
28  
29 and consistent view of the constructs and their meaning, leading to a consistency and robustness in  
30  
31 coding and analysis.  
32  
33

### 34 35 36 37 **Limitations of the study**

38  
39 The study is based on the experiences of a single team during one, albeit large multi-site, project.  
40  
41 However, the team did represent a diverse range of professional and disciplinary backgrounds, and  
42  
43 cultures operating within European primary care settings. The training was focused on the use of  
44  
45 only one theoretical framework – NPT – but we believe that the lessons learned from this and the  
46  
47 recommendations arising from the work are applicable to other theoretical frameworks. Finally,  
48  
49 although a participatory, qualitative approach was used throughout, we did not have the time within  
50  
51 the project to conduct a more in-depth qualitative exploration of the views and experiences of the  
52  
53 research team as they applied our chosen theory to the fieldwork.  
54  
55  
56  
57  
58  
59  
60

## Conclusion

Overall, we found the prospective application of NPT to our work to be invaluable but, at times, challenging. We believe that these issues were not unique to the use of NPT, but could arise with the use of other theories, especially in large multi-site and cross-country projects. The development of a complementary package of training to support the use of our chosen theory ensured that our work was consistently and robustly informed by theory at all stages of the project, from design through data collection to analysis. This approach can, and should, be adopted by future research teams carrying out theoretically-informed implementation studies.

### Competing interests

The authors declare that there are no competing interests.

### Authors contributions

All authors (COD, FM, CD, MO'RdeB, TdeB, NB, CL, AS, MP, MvdM, EvWB, KG, LC, CP, ET, FvdDM, MV, WS, AMcF) made substantial contributions to the design and development of RESTORE and its training programme, to the collection of data or to the analysis and interpretation of the data. Training materials were developed by COD, FM, CD and AMcF, with input from MO'RdeB and TdeB. COD wrote the first draft of the paper and led substantive re-drafting, supported by FM, CD and AMcF; all authors listed above were involved in revising and commenting on later drafts of the manuscript. All authors have given their final approval to this version.

### Acknowledgements

Some of this work was presented at a workshop at the North American Primary Care Research Group Meeting in November 2014 and we thank the participants for their helpful comments; we also thank Professor Carl May, University of Southampton for his support and helpful discussions. We also thank our reviewers, whose insightful comments have enhanced the clarity and order of this paper.

### Consent to use data

Ethical approval to use data generated during training was obtained from the National University of Ireland, Galway. All members of the RESTORE team agreed to their evaluation comments being used in this paper.

1  
2  
3  
4  
5  
6  
7  
8  
9  
10  
11  
12  
13  
14  
15  
16  
17  
18  
19  
20  
21  
22  
23  
24  
25  
26  
27  
28  
29  
30  
31  
32  
33  
34  
35  
36  
37  
38  
39  
40  
41  
42  
43  
44  
45  
46  
47  
48  
49  
50  
51  
52  
53  
54  
55  
56  
57  
58  
59  
60

**Funding**

RESTORE was funded by the European Union’s FP7 Health Programme, contract number 257258.

The funder has not contributed to the views expressed in this paper.

**Data Sharing**

No additional data available. Training materials are available as described in the Supplementary Files.

For peer review only

## References

1. Woolf SH. The meaning of translational research and why it matters. *JAMA* 2008;299(2):211-13.
2. Pronovost PJ, Goeschel CA. Time to take health delivery research seriously. *JAMA* 2011;306(3):310-11.
3. Eccles MP, Armstrong D, Baker R, et al. An implementation research agenda. *Implementation Science* 2009;4(1):18.
4. Greenhalgh T, Robert G, Macfarlane F, et al. Diffusion of innovations in service organizations: Systematic review and recommendations. *Milbank Quarterly* 2004;82(4):581-629.
5. The Improved Clinical Effectiveness through Behavioural Research Group (ICEBeRG). Designing theoretically-informed implementation interventions. *Implementation Science* 2006;1(1):4.
6. Davidoff F, Dixon-Woods M, Leviton L, et al. Demystifying theory and its use in improvement. *BMJ Quality & Safety* 2015 doi: 10.1136/bmjqs-2014-003627
7. Sales A, Smith J, Curran G, et al. Models, strategies, and tools. Theory in implementing evidence-based findings into health care practice. *Journal of General Internal Medicine* 2006;21(2):S43-S49. doi: 10.1007/s11606-006-0274-x
8. Forster D, Newton M, McLachlan H, et al. Exploring implementation and sustainability of models of care: can theory help? *BMC Public Health* 2011;11(Suppl 5):S8.
9. Craig P, Dieppe P, Macintyre S, et al. Developing and evaluating complex interventions: The new Medical Research Council guidance. *International Journal of Nursing Studies* 2013;50(5):587-92.
10. Davies P, Walker A, Grimshaw J. A systematic review of the use of theory in the design of guideline dissemination and implementation strategies and interpretation of the results of rigorous evaluations. *Implementation Science* 2010;5(1):14.
11. Colquhoun HL, Brehaut JC, Sales A, et al. A systematic review of the use of theory in randomized controlled trials of audit and feedback. *Implementation Science* 2013;8(1):66.
12. McDonald KM, Graham ID, Grimshaw J. Toward a theoretic basis for quality improvement interventions. In: Shojania KG, McDonald KM, Wachter RM, et al., eds. Closing the quality gap: A

- 1  
2  
3 critical analysis of quality improvement strategies Rockville, MD: Agency for Healthcare Research  
4 and Quality 2004:27-40.  
5  
6  
7 13. Nilsen P. Making sense of implementation theories, models and frameworks. *Implementation*  
8  
9 *Science* 2015;10(1):53.  
10  
11 14. Weiss CH. Nothing as practical as a good theory: Exploring theory-based evaluation for  
12 comprehensive community-based initiatives for children and families. In: Connell JP, Kubisch AC,  
13 Schorr LB, et al., eds. *New approaches to evaluating community initiatives, Vol 1 Concepts, methods*  
14 *and contexts*. Washington DC: Aspen Institute 1995.  
15  
16 15. Tabak RG, Khoong EC, Chambers DA, et al. Bridging research and practice: Models for  
17 dissemination and implementation research. *American Journal of Preventive Medicine*  
18 2012;43(3):337-50.  
19  
20 16. Grol RPTM, Bosch MC, Hulscher MEJL, et al. Planning and studying improvement in patient care:  
21 The use of theoretical perspectives. *The Milbank Quarterly* 2007;85(1):93-138.  
22  
23 17. Wyke S, Adamson J, Dixon D, et al. Consultation and illness behaviour in response to symptoms:  
24 A comparison of models from different disciplinary frameworks and suggestions for future research  
25 directions. *Social Science & Medicine* 2013;86(0):79-87.  
26  
27 18. Ullrich PM, Sahay A, Stetler CB. Use of implementation theory: A focus on PARIHS. *Worldviews*  
28 *on Evidence-Based Nursing* 2014;11(1):26-34. doi: 10.1111/wvn.12016  
29  
30 19. Glasgow RE, Vogt TM, Boles SM. Evaluating the public health impact of health promotion  
31 interventions: the RE-AIM framework. *Am J Public Health* 1999;89(9):1322-27.  
32  
33 20. Gaglio B, Shoup JA, Glasgow RE. The RE-AIM framework: A systematic review of use over time.  
34 *American Journal of Public Health* 2013;103(6):e38-e46. doi: 10.2105/AJPH.2013.301299  
35  
36 21. Kitson AL, Rycroft-Malone J, Harvey G, et al. Evaluating the successful implementation of  
37 evidence into practice using the PARIHS framework: theoretical and practical challenges.  
38 *Implementation Science* 2008;3(1):1.  
39  
40  
41  
42  
43  
44  
45  
46  
47  
48  
49  
50  
51  
52  
53  
54  
55  
56  
57  
58  
59  
60

- 1  
2  
3 22. Helfrich CD, Damschroder LJ, Hagedorn HJ, et al. A critical synthesis of literature on the  
4 promoting action on research implementation in health services (PARIHS) framework.  
5  
6  
7 *Implementation Science* 2010;5(1):82. doi: 10.1186/1748-5908-5-82  
8  
9  
10 23. Field B, Booth A, Ilott I, et al. Using the Knowledge to Action Framework in practice: a citation  
11 analysis and systematic review. *Implementation Science* 2014;9(1):172.  
12  
13  
14 24. McEvoy R, Ballini L, Maltoni S, et al. A qualitative systematic review of studies using the  
15 normalization process theory to research implementation processes. *Implementation Science*  
16  
17 2014;9(1):2.  
18  
19  
20 25. Crosby R, Noar SM. Theory development in health promotion: are we there yet? *J Behav Med*  
21  
22 2010;33(4):259-63. doi: 10.1007/s10865-010-9260-1  
23  
24  
25 26. Benzer J, Beehler S, Cramer I, et al. Between and within-site variation in qualitative  
26 implementation research. *Implementation Science* 2013;8(1):4. doi: 10.1186/1748-5908-8-4  
27  
28  
29 27. MacFarlane A, O'Donnell C, Mair F, et al. REsearch into implementation STRategies to support  
30 patients of different ORigins and language background in a variety of European primary care settings  
31 (RESTORE): study protocol. *Implementation Science* 2012;7:111.  
32  
33  
34 28. MacFarlane A, O'Reilly-de Brún M, de Brún T, et al. Healthcare for migrants, participatory health  
35 research and implementation science—better health policy and practice through inclusion. The  
36 RESTORE project. *European Journal of General Practice* 2014:1-5. doi:  
37  
38 10.3109/13814788.2013.868432  
39  
40  
41 29. O'Donnell CA, Burns N, Mair FS, et al. Reducing the health care burden for marginalised migrants:  
42 The potential role for primary care in Europe. *Health Policy* 2016 doi:  
43  
44 10.1016/j.healthpol.2016.03.012  
45  
46  
47  
48  
49 30. O'Reilly-de Brún M, MacFarlane A, de Brún T, et al. Involving migrants in the development of  
50 guidelines for communication in cross-cultural general practice consultations: a participatory  
51 learning and action research project. *BMJ Open* 2015;5(9) doi: 10.1136/bmjopen-2014-007092  
52  
53  
54  
55  
56  
57  
58  
59  
60

- 1  
2  
3 31. de Brún T, O'Reilly-de Brún M, O'Donnell CA, et al. Learning from doing: the case for combining  
4  
5 normalisation process theory and participatory learning and action research methodology for  
6  
7 primary healthcare implementation research. *BMC Health Services Research* 2016;16:346. doi:  
8  
9 10.1186/s12913-016-1587-z  
10  
11 32. May C, Finch T. Implementing, embedding, and integrating practices: An outline of Normalization  
12  
13 Process Theory. *Sociology* 2009;43(3):535-54.  
14  
15 33. May CR, Mair F, Finch T, et al. Development of a theory of implementation and integration:  
16  
17 Normalization Process Theory. *Implementation Science* 2009;4(1):29.  
18  
19 34. Bamford C, Heaven B, May C, et al. Implementing nutrition guidelines for older people in  
20  
21 residential care homes: a qualitative study using Normalization Process Theory. *Implementation*  
22  
23 *Science* 2012;7(1):106.  
24  
25 35. May CR, Sibley A, Hunt K. The nursing work of hospital-based clinical practice guideline  
26  
27 implementation: An explanatory systematic review using Normalisation Process Theory.  
28  
29 *International Journal of Nursing Studies* 2014;51(2):289-99.  
30  
31 36. Gallacher K, May CR, Montori VM, et al. Understanding patients' experiences of treatment  
32  
33 burden in chronic heart failure using Normalization Process Theory. *Annals of Family Medicine*  
34  
35 2011;9(3):235-43.  
36  
37 37. Gallacher K, Morrison D, Jani B, et al. Uncovering treatment burden as a key concept for stroke  
38  
39 care: A systematic review of qualitative research. *PLoS Med* 2013;10(6):e1001473. doi:  
40  
41 doi:10.1371/journal.pmed.1001473  
42  
43 38. Jani B, Blane D, Browne S, et al. Identifying treatment burden as an important concept for end of  
44  
45 life care in those with advanced heart failure. *Current Opinion in Supportive Palliative Care*  
46  
47 2013;7(1):3-7. doi: doi:"10.1097/SPC.0b013e32835c071f"  
48  
49 39. Murray E, Treweek S, Pope C, et al. Normalisation process theory: a framework for developing,  
50  
51 evaluating and implementing complex interventions. *BMC Medicine* 2010;8(1):63.  
52  
53  
54  
55  
56  
57  
58  
59  
60



- 1  
2  
3 40. de Brún T, O'Reilly de-Brún M, van Weel-Baumgarten E, et al. Guidelines and training initiatives  
4 that support communication in cross-cultural primary-care settings: appraising their  
5  
6  
7 implementability using Normalization Process Theory. *Family Practice* 2015;32(4):420-25. doi:  
8  
9  
10 10.1093/fampra/cmz022
- 11  
12 41. Lionis C, Papadakaki M, Saridaki A, et al. Engaging migrants and other stakeholders to improve  
13  
14 communication in cross-cultural consultation in primary care: a theoretically informed participatory  
15  
16 study. *BMJ Open* 2016;6:e010822. doi: 10.1136/bmjopen-2015-010822
- 17  
18 42. May C, Finch T, Mair F, et al. Understanding the implementation of complex interventions in  
19  
20 health care: the normalization process model. *BMC Health Services Research* 2007;7:148.
- 21  
22 43. May C, Mair F, Dowrick C, et al. Process evaluation for complex interventions in primary care:  
23  
24 understanding trials using the normalization process model. *BMC Family Practice* 2007;8(1):42.
- 25  
26 44. May CR. Assessing and evaluating complex interventions for chronic disease management: The  
27  
28 nomalization process model, 2006.
- 29  
30  
31 45. Gunn JM, Palmer VJ, Dowrick CF, et al. Embedding effective depression care: using theory for  
32  
33 primary care organisational and systems change. . *Implementation Science* 2010;5:62.
- 34  
35 46. McEvoy R, MacFarlane A. Community participation in primary care in Ireland: the need for  
36  
37 implementation research. *Primary Health Care Research & Development* 2013;14(2):126-39.
- 38  
39 47. Devlin AM, McGee-Lennon M, O'Donnell CA, et al. Delivering digital health and well-being at  
40  
41 scale: Lessons learned during the implementation of the dallas program in the United Kingdom.  
42  
43 *Journal of the American Medical Informatics Association* 2016;23:48-59. doi: 10.1093/jamia/ocv097
- 44  
45  
46 48. Teunissen E, Gravenhorst K, Dowrick C, et al. Implementing guidelines and training initiatives to  
47  
48 improve cross-cultural communication in primary care consultations: a qualitative participatory  
49  
50 European study. *International Journal for Equity in Health* 2017;16(1):32. doi: 10.1186/s12939-017-  
51  
52 0525-y
- 53  
54  
55 49. Ritchie J, Spencer L. Qualitative data analysis for applied policy research. In: Bryman A, Burgess  
56  
57 RG, eds. *Analyzing qualitative data*. London: Routledge 1994:173-94.
- 58  
59  
60

1  
2  
3 50. Michie S, van Stralen MM, West R. The behaviour change wheel: A new method for  
4  
5 characterising and designing behaviour change interventions. *Implementation Science* 2011;6(1):42.  
6

7 51. Mackenzie M, Conway E, Hastings A, et al. Is "candidacy" a useful concept for understanding  
8  
9 journeys through public services? A critical interpretive literature synthesis. *Social Policy &*  
10  
11 *Administration* 2013;47(7):806-25. doi: 10.1111/j.1467-9515.2012.00864.x  
12

13 52. Mackenzie M, Conway E, Hastings A, et al. Intersections and multiple 'candidacies': Exploring  
14  
15 connections between two theoretical perspectives on domestic abuse and their implications for  
16  
17 practicing policy. *Social Policy and Society* 2015;14(01):43-62. doi: doi:10.1017/S1474746414000244  
18  
19  
20  
21  
22  
23  
24  
25  
26  
27  
28  
29  
30  
31  
32  
33  
34  
35  
36  
37  
38  
39  
40  
41  
42  
43  
44  
45  
46  
47  
48  
49  
50  
51  
52  
53  
54  
55  
56  
57  
58  
59  
60

1  
2  
3 **Figure 1. The three stages of RESTORE**  
4

5 **Figure 2. Stages of NPT training and alignment with RESTORE fieldwork**  
6  
7

8 **Figure 3. NPT 'light' training material**  
9

10 **Figure 4. Example of a visual data mapping exercise**  
11  
12  
13  
14  
15  
16  
17  
18  
19  
20  
21  
22  
23  
24  
25  
26  
27  
28  
29  
30  
31  
32  
33  
34  
35  
36  
37  
38  
39  
40  
41  
42  
43  
44  
45  
46  
47  
48  
49  
50  
51  
52  
53  
54  
55  
56  
57  
58  
59  
60

For peer review only

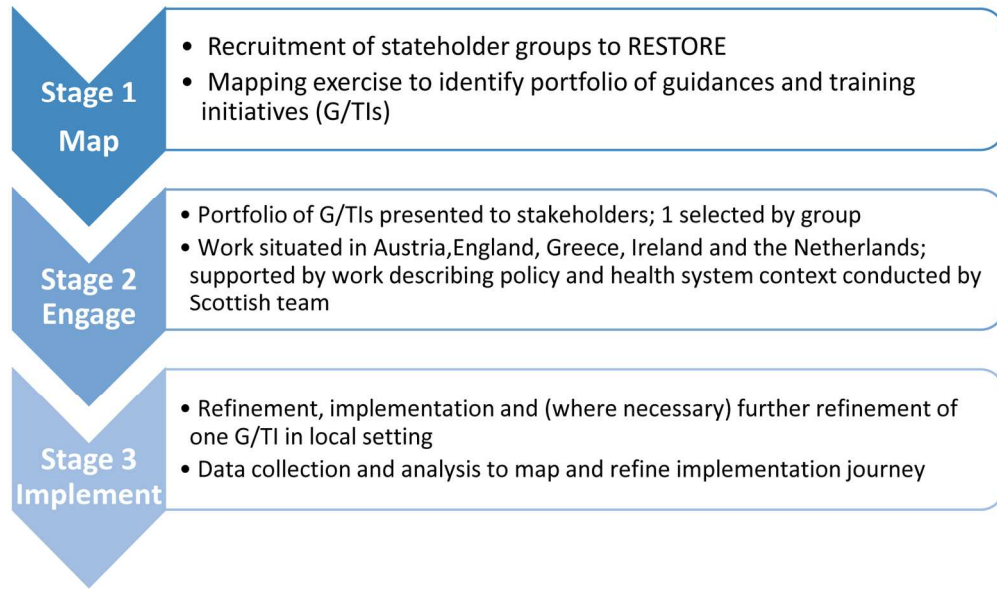

Figure 1. The three stages of RESTORE

154x91mm (300 x 300 DPI)

Review only

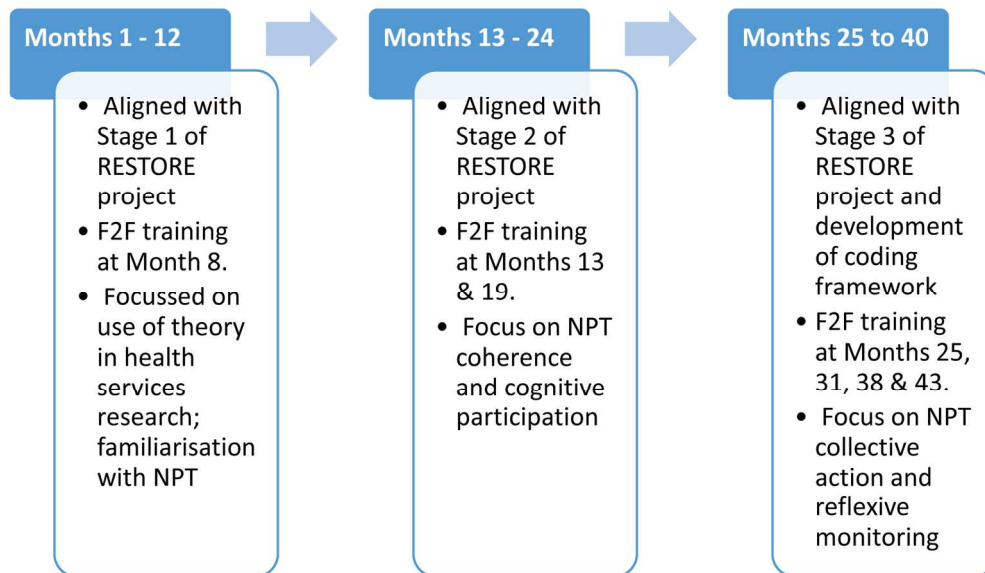

Figure 2. Stages of NPT training and alignment with RESTORE fieldwork

154x90mm (300 x 300 DPI)

Review only

1  
2  
3  
4  
5  
6  
7  
8  
9  
10  
11  
12  
13  
14  
15  
16  
17  
18  
19  
20  
21  
22  
23  
24  
25  
26  
27  
28  
29  
30  
31  
32  
33  
34  
35  
36  
37  
38  
39  
40  
41  
42  
43  
44  
45  
46  
47  
48  
49  
50  
51  
52  
53  
54  
55  
56  
57  
58  
59  
60

1  
2  
3  
4  
5  
6  
7  
8  
9  
10  
11  
12  
13  
14  
15  
16  
17  
18  
19  
20  
21  
22  
23  
24  
25  
26  
27  
28  
29  
30  
31  
32  
33  
34  
35  
36  
37  
38  
39  
40  
41  
42  
43  
44  
45  
46  
47  
48  
49  
50  
51  
52  
53  
54  
55  
56  
57  
58  
59  
60

**Question: Do we think a circus tent can become a normalised venue for accommodation for our next RESTORE team meeting?**

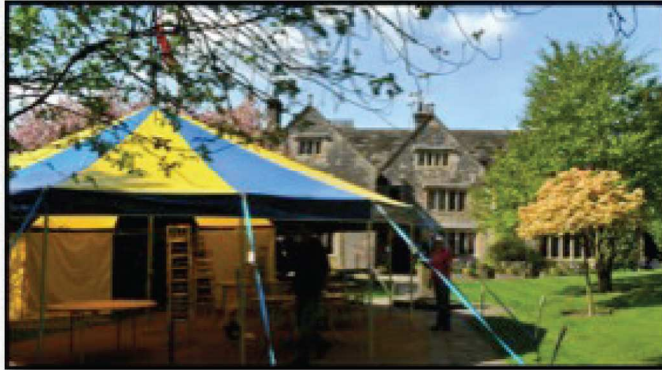

In addressing this question, consider the following NPT sensitising questions:

Does this make sense to the team as a whole and to individuals within the team?

(Coherence)

What work needs to be done to get everyone in the team to engage with the idea?

(Cognitive participation)

Who needs to do what to put this into action? What resources do we need? (Collective action)

How will we know if it worked in practice? (Reflexive monitoring)

Figure 3. NPT "light" training material

149x132mm (300 x 300 DPI)

only

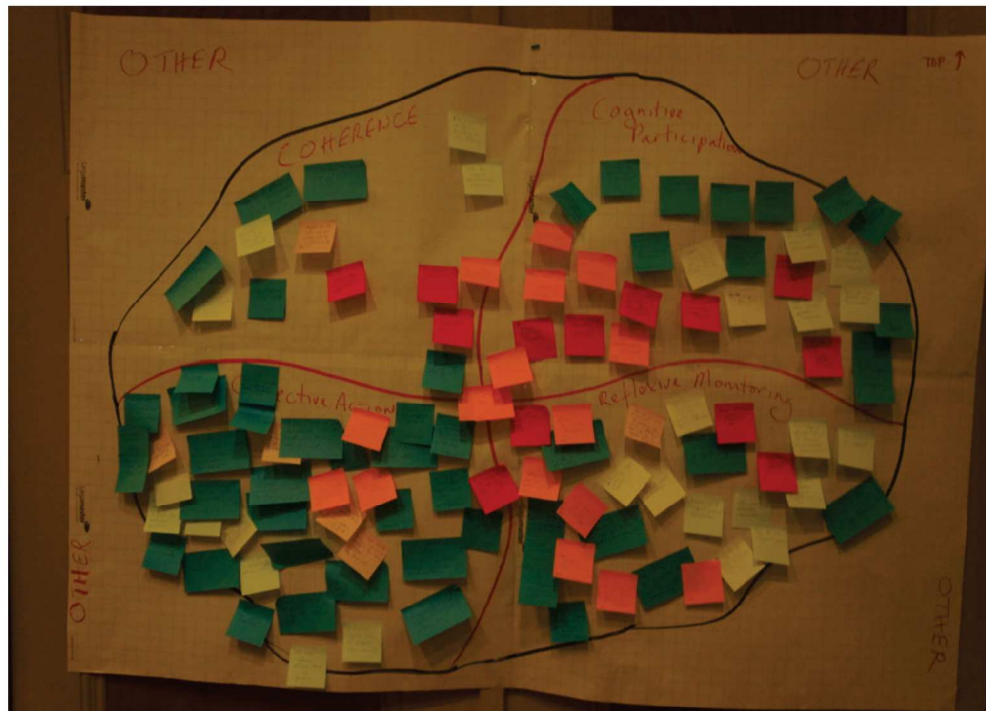

Each “sticky” notelet corresponds to an item of verbal data identified from the interactive role play discussion

Figure 4. Example of a visual data mapping exercise

160x129mm (300 x 300 DPI)

## Supplementary File 1. RESTORE team backgrounds and NPT experience

| Country           | Professional background                                                | Experience of NPT                                                   | Country            | Professional background        | Experience of NPT                                                                                  |
|-------------------|------------------------------------------------------------------------|---------------------------------------------------------------------|--------------------|--------------------------------|----------------------------------------------------------------------------------------------------|
| <b>Austria</b>    |                                                                        |                                                                     | <b>Ireland</b>     |                                |                                                                                                    |
| RESTORE Applicant | Academic general practitioner                                          | New to NPT                                                          | RESTORE Applicant  | Social scientist               | Experienced in use of NPT; part of original group who developed NPT; using NPT in several projects |
| Researcher        | Social scientist                                                       | New to NPT                                                          | Researcher         | Social/cultural anthropologist | Familiar with NPM; New to NPT                                                                      |
|                   |                                                                        |                                                                     | Researcher         | Social/cultural anthropologist | New to NPT                                                                                         |
| <b>England</b>    |                                                                        |                                                                     | <b>Netherlands</b> |                                |                                                                                                    |
| RESTORE Applicant | Academic general practitioner                                          | Experienced in use of NPT; part of original group who developed NPT | RESTORE Applicant  | Academic general practitioner  | New to NPT                                                                                         |
| Researcher        | Social anthropologist                                                  | New to NPT                                                          | RESTORE Applicant  | Academic general practitioner  | New to NPT                                                                                         |
| Researcher        | Social scientist                                                       | New to NPT                                                          | Researcher         | Academic general practitioner  | New to NPT                                                                                         |
|                   |                                                                        |                                                                     | Researcher         | Social/cultural anthropologist | New to NPT                                                                                         |
| <b>Greece</b>     |                                                                        |                                                                     | <b>Scotland</b>    |                                |                                                                                                    |
| RESTORE Applicant | Academic general practitioner; Primary health care services researcher | New to NPT                                                          | RESTORE Applicant  | Health services research       | Experienced in use of NPT; part of NIHR NPT user group; using NPT in several projects              |
| Researcher        | Public health researcher                                               | New to NPT                                                          | RESTORE Applicant  | Academic general practitioner  | Experienced in use of NPT; part of original group who developed NPT; using NPT in                  |



1  
2  
3  
4  
5  
6  
7  
8  
9  
10  
11  
12  
13  
14  
15  
16  
17  
18  
19  
20  
21  
22  
23  
24  
25  
26  
27  
28  
29  
30  
31  
32  
33  
34  
35  
36  
37  
38  
39  
40  
41  
42  
43  
44  
45  
46  
47

|            |                         |            |            |             |                                |
|------------|-------------------------|------------|------------|-------------|--------------------------------|
| Researcher | Lecturer in social work | New to NPT | Researcher | Sociologist | several projects<br>New to NPT |
|------------|-------------------------|------------|------------|-------------|--------------------------------|

---

For peer review only

## Supplementary File 2. NPT training programme

| Training                                         | Session & Duration                 | Content                                                                                                                                                                                                                                                                                                                                                |
|--------------------------------------------------|------------------------------------|--------------------------------------------------------------------------------------------------------------------------------------------------------------------------------------------------------------------------------------------------------------------------------------------------------------------------------------------------------|
| <b>Early project training (Months 1 to 12)</b>   |                                    |                                                                                                                                                                                                                                                                                                                                                        |
| Month 8<br>November<br>2011                      | Training Session 1.<br>(2.5 hours) | <b>Introduction to NPT.</b><br>Development of NPT from ehealth research.<br><br>Overview of NPT and its four main constructs.                                                                                                                                                                                                                          |
|                                                  | Training Session 2.<br>(4.5 hours) | <b>Using NPT in RESTORE.</b><br>Example of using NPT in a qualitative study on use of interpreters in primary care.<br><br>Using NPT in RESTORE – focus on constructs of coherence and cognitive participation<br><br>Participatory Exercise 1: Team asked to think about the issues arising from implementation of paid interpreters in primary care. |
| <b>Mid-project training (Months 13 to 24)</b>    |                                    |                                                                                                                                                                                                                                                                                                                                                        |
| Month 13<br>April 2012                           | Training Session 3.<br>(2.0 hours) | <b>Using NPT in RESTORE.</b><br>Focus of NPT constructs coherence and cognitive participation.<br><br>Participatory Exercise 2: NPT “light” non-RESTORE exercise                                                                                                                                                                                       |
|                                                  | Training Session 4.<br>(2.0 hours) | Focus of NPT constructs coherence and cognitive participation.<br><br>Participatory Exercise 3: NPT RESTORE exercise                                                                                                                                                                                                                                   |
| Month 20<br>November<br>2012                     | Training Session 5<br>(2.0 hours)  | <b>Addressing anxieties.</b><br>Roundtable discussion of arising concerns.<br>Review of why NPT being used and its role in the project.                                                                                                                                                                                                                |
|                                                  | Training Session 6<br>(2.0 hours)  | <b>Using NPT in RESTORE.</b><br>Participatory Exercise 4: NPT RESTORE exercise                                                                                                                                                                                                                                                                         |
| <b>Later training sessions (Months 25 to 48)</b> |                                    |                                                                                                                                                                                                                                                                                                                                                        |
| Month 25<br>April 2013                           | Training session 7<br>(2.5 hours)  | <b>Coding using NPT.</b><br>Preparatory work of coding data extract; face-to-face discussion of coding decisions at Consortium training.<br>Participatory Exercise 5: Discussion of coded extract of RESTORE data.                                                                                                                                     |
| Month 31<br>October 2013                         | Training session 8<br>(1.5 hours)  | <b>Addressing anxieties.</b><br>Roundtable discussion of progress with respect to using NPT                                                                                                                                                                                                                                                            |

1  
2  
3  
4  
5  
6  
7  
8  
9  
10  
11  
12  
13  
14  
15  
16  
17  
18  
19  
20  
21  
22  
23  
24  
25  
26  
27  
28  
29  
30  
31  
32  
33  
34  
35  
36  
37  
38  
39  
40  
41  
42  
43  
44  
45  
46  
47  
48  
49  
50  
51  
52  
53  
54  
55  
56  
57  
58  
59  
60

|                          |                                     |                                                                                                                                                                                             |
|--------------------------|-------------------------------------|---------------------------------------------------------------------------------------------------------------------------------------------------------------------------------------------|
|                          |                                     | in fieldwork and in coding.                                                                                                                                                                 |
|                          | Training session 9<br>(3 hours)     | <b>Coding using NPT.</b><br>Team reviewed coding exercise conducted in-between face-to-face meetings; discussed Irish data transcript coded by AMacF; and discussed team coding “dilemmas”. |
| Month 38<br>May 2014     | Training session<br>10<br>(3 hours) | <b>Coding using NPT.</b><br>Focused on reviewing where each country team was in relation to NPT coding; connections between fieldwork and NPT; identifying and discussing coding dilemmas.  |
| Month 43<br>October 2014 | Training session<br>11              | Final discussion and clarification of coding framework.                                                                                                                                     |

---

---

**Supplementary File 3. Participatory exercises**

|                                                                                                                      |                                       |                                                                                                                                                                                                                                                                                                                                                                                                                                                                                                                                                                                                                                                                                                                                                                                                                                                            |
|----------------------------------------------------------------------------------------------------------------------|---------------------------------------|------------------------------------------------------------------------------------------------------------------------------------------------------------------------------------------------------------------------------------------------------------------------------------------------------------------------------------------------------------------------------------------------------------------------------------------------------------------------------------------------------------------------------------------------------------------------------------------------------------------------------------------------------------------------------------------------------------------------------------------------------------------------------------------------------------------------------------------------------------|
| 1<br>2<br>3<br>4<br>5<br>6<br>7<br>8                                                                                 |                                       |                                                                                                                                                                                                                                                                                                                                                                                                                                                                                                                                                                                                                                                                                                                                                                                                                                                            |
| 9<br>10<br>11<br>12<br>13<br>14<br>15<br>16                                                                          | Month 8,<br>Participatory Exercise 1  | <p>Consider the following scenario: Your health organisation is about to introduce paid interpreters into the primary care consultation. What NPT-informed questions might you ask to assess how well this is implemented into practice?</p> <p>Participants were directed to the NPT toolkit, with its 16 questions, to help them “think this through”</p>                                                                                                                                                                                                                                                                                                                                                                                                                                                                                                |
| 17<br>18<br>19<br>20<br>21<br>22<br>23<br>24<br>25<br>26<br>27<br>28<br>29<br>30<br>31<br>32<br>33<br>34<br>35<br>36 | Month 13,<br>Participatory Exercise 2 | <p>NPT “light”: An exercise designed to get the research team thinking about coherence (understanding) and cognitive participation (participation). Using interactive small group work, the team focussed on an example entitle “Circus tent”. Teams were asked to consider if a circus tent could become normalised as team accommodation for future Consortium meetings.</p> <p>While the team debated this, the NPT trainers observed the questions, took notes and assigned these to NPT categories. E.g.</p> <p>Is this something new to me? (Coherence - Differentiation)</p> <p>Do you think this will be helpful to the team? (Coherence – Internalisation)</p> <p>Will everyone agree that this is reasonable? (Cognitive participation - Legitimation)</p> <p>How many of the team buy into this idea? (Cognitive participation = Enrolment)</p> |
| 37<br>38<br>39<br>40<br>41<br>42<br>43<br>44<br>45<br>46<br>47<br>48                                                 | Month 13,<br>Participatory Exercise 3 | <p>NPT RESTORE exercise: Teams asked to consider the issues that might arise when implementing paid interpreters in primary care. Half of the team were assigned roles (GP, nurse, interpreter, migrant patient) and role-played a discussion about using interpreters; other half of team watched, noting key questions and issues that arose, then assigned these to NPT constructs.</p> <p>N.B. The exercise was designed to focus on the constructs of coherence and cognitive participation; however, teams also had to pay attention to collective action and reflexive monitoring.</p>                                                                                                                                                                                                                                                              |
| 49<br>50<br>51<br>52<br>53<br>54<br>55<br>56                                                                         | Month 20,<br>Participatory Exercise 4 | <p>NPT RESTORE exercise: Teams given the G/PI selected by the Irish team. Asked to role play as a practice team with roles assigned to address the question “What levels and barriers will you encounter as you try to implement this guidance in practice?”.</p> <p>Project members took turns at either role playing or noting NPT issue and assigning them to constructs.</p>                                                                                                                                                                                                                                                                                                                                                                                                                                                                           |
| 57<br>58<br>59<br>60                                                                                                 | Month 25,<br>Participatory Exercise 5 | <p>NPT RESTORE exercise: Teams pre-circulated a short extract from a training DVD developed by the PLA trainers in which the Irish team role-played a training session with stakeholders. Teams were asked to code the qualitative extract to the main NPT construct. Three external researchers expert in the use of NPT also asked to code the extract, as</p>                                                                                                                                                                                                                                                                                                                                                                                                                                                                                           |

---

1  
2  
3 well as RESTORE NPT training team. Coding collated and presented,  
4 paragraph by paragraph, to team at face-to-face meeting.  
5  
6

---

7  
8  
9  
10  
11  
12  
13  
14  
15  
16  
17  
18  
19  
20  
21  
22  
23  
24  
25  
26  
27  
28  
29  
30  
31  
32  
33  
34  
35  
36  
37  
38  
39  
40  
41  
42  
43  
44  
45  
46  
47  
48  
49  
50  
51  
52  
53  
54  
55  
56  
57  
58  
59  
60

For peer review only

**Supplementary File 4. Location of NPT presentations on Slideshare**

NPT Unpicked for the RESTORE project (<http://www.slideshare.net/KateODonnell6/npt-unpicked-for-restore-project-57742520>).

NPT training session 2 for RESTORE (<http://www.slideshare.net/KateODonnell6/npt-training-session-2-for-restore>)

NPT in RESTORE (<http://www.slideshare.net/KateODonnell6/npt-in-restore>)

NPT Coding exercise for RESTORE (<http://www.slideshare.net/KateODonnell6/npt-coding-exercise-for-restore-57743364>)

O'Donnell et al.

**Supporting the use of theory in cross-country health services research: Normalisation Process Theory as an example**

**Reporting Checklist.**

**Checklist used:** Smith L, Rosenzweig L, Schmidt M. Best practices in the reporting of participatory action research: Embracing both the forest and the trees. The Counseling Psychologist 2010;**38**(8):1115-38

**Guidelines for the reporting of participatory action research (PAR).**

| Criteria from Smith et al                    | As reported in O'Donnell et al                                                                                                                                                                                                                                                                                                                                                                                                                                                                                                                                                                                                                                                                                                                         |
|----------------------------------------------|--------------------------------------------------------------------------------------------------------------------------------------------------------------------------------------------------------------------------------------------------------------------------------------------------------------------------------------------------------------------------------------------------------------------------------------------------------------------------------------------------------------------------------------------------------------------------------------------------------------------------------------------------------------------------------------------------------------------------------------------------------|
| <b>Organisational structure of the paper</b> | <p>We have based the organizational structure of our paper on the guidance issued by BMJ Open. We have, therefore, reported using the structure of Introduction, Methods, Results, Discussion.</p> <p>While we have sought to match the content of each section to the general expectations of the BMJ Open audience, the Methods section contains a more descriptive account on the way that the training programme evolved and developed in response to the needs of the research team.</p> <p>Again, the discussion section moves beyond a conventional discussion and is the place where we include our generic recommendations which, we believe, could be applied to the development of training in the use of other theoretical frameworks.</p> |
| <b>Key elements of the project</b>           | <p>Please note: in the application of this checklist, the term 'project' is taken to apply to the training programme in the use of NPT (hereafter described as the 'NPT training programme', which is the subject of this paper. Where necessary, we also refer to RESTORE, which was the FP7 funded research project that the NPT training programme was designed to support. We hope this</p>                                                                                                                                                                                                                                                                                                                                                        |

|                                                  |                                                                                                                                                                                                                                                                                                                                                                                                                                                                                                                                                                                                                                                                                                                                                                                                                                                                                                                                                                                                                                                                                                                                                                                                                                                                                                                                                              |
|--------------------------------------------------|--------------------------------------------------------------------------------------------------------------------------------------------------------------------------------------------------------------------------------------------------------------------------------------------------------------------------------------------------------------------------------------------------------------------------------------------------------------------------------------------------------------------------------------------------------------------------------------------------------------------------------------------------------------------------------------------------------------------------------------------------------------------------------------------------------------------------------------------------------------------------------------------------------------------------------------------------------------------------------------------------------------------------------------------------------------------------------------------------------------------------------------------------------------------------------------------------------------------------------------------------------------------------------------------------------------------------------------------------------------|
|                                                  | distinction is clear in our responses below.                                                                                                                                                                                                                                                                                                                                                                                                                                                                                                                                                                                                                                                                                                                                                                                                                                                                                                                                                                                                                                                                                                                                                                                                                                                                                                                 |
| How was the project initiated?                   | <p>The NPT training programme was initiated in response to the needs of the RESTORE research team, to support them in their understanding and use of the theoretical framework being used. This is described in the paper as follows:</p> <p><b>Introduction, Page 7:</b> Research teams must be comfortable and aligned with the use of the selected theory and in agreement about the meaning and application of its individual components or constructs. Such challenges are enhanced when teams are working in different settings, countries and across language as construct understanding and implementation are likely to be both culturally and context-dependent. This mirrors challenges identified in conducting qualitative research across different settings.<sup>26</sup> These challenges faced the EU-funded RESTORE project, a multi-site implementation study across six European countries (Box 1).<sup>27</sup> Focussed on cross-cultural communication in primary care, the design and analysis of RESTORE was underpinned throughout by a recognised theoretical framework - Normalisation Process Theory (NPT). However, the application of theory to a research study was a new concept for many members of the team. As a result, we had to develop a training programme to familiarise and support the team in this process.</p> |
| What was the project's timeframe?                | <p>The RESTORE project was a 48-month project (see Figure 1); the NPT training programme was initiated at month 8 and ran in tandem with the project. This is described on Page 12 and illustrated in Figure 2:</p> <p><b>Methods, Page 12: Application of theory to the RESTORE study</b></p> <p>As described previously, the RESTORE project was designed in three, inter-related stages (Figure 1). Although not entirely linear, the study was designed to broadly align to the four constructs of NPT (Figure 2). Stage 1 focused on familiarisation, first on the broad need to apply theory to RESTORE and then, with NPT itself. Stage 2 mapped to coherence and cognitive participation; Stage 3 mapped to collective action and reflexive monitoring. This structure then influenced the design of the training for the team, which is now described in detail.</p>                                                                                                                                                                                                                                                                                                                                                                                                                                                                                |
| Who were the participants and/or co-researchers? | <p>The participants were the 19 members of the RESTORE research team. They were also the co-researchers in the design, application and evaluation of the NPT training programme. The team consisted of the senior academics who wrote the RESTORE funding application and the researchers who were employed on RESTORE. The team was multi-professional and multi-disciplinary, consisting of academic general practitioners/family doctors, anthropologists, social</p>                                                                                                                                                                                                                                                                                                                                                                                                                                                                                                                                                                                                                                                                                                                                                                                                                                                                                     |



|                                                                                  |                                                                                                                                                                                                                                                                                                                                                                                                                                                                                                                                                                                                                                                                                                                                                                                                                                                                                                                                                                                                                                                                                                                                                                                                                                      |
|----------------------------------------------------------------------------------|--------------------------------------------------------------------------------------------------------------------------------------------------------------------------------------------------------------------------------------------------------------------------------------------------------------------------------------------------------------------------------------------------------------------------------------------------------------------------------------------------------------------------------------------------------------------------------------------------------------------------------------------------------------------------------------------------------------------------------------------------------------------------------------------------------------------------------------------------------------------------------------------------------------------------------------------------------------------------------------------------------------------------------------------------------------------------------------------------------------------------------------------------------------------------------------------------------------------------------------|
|                                                                                  | <p>scientists and health services/primary care researchers.</p> <p>The composition of the team is described in the <b>abstract</b>, in <b>Methods page 9</b> and more fully in <b>Supplementary File 1</b>.</p> <p><b>Abstract: Participants:</b> RESTORE research team consisting 8 project applicants, all senior primary care academics; 10 researchers. Professional backgrounds included 7 academic general practitioners; 4 social/cultural anthropologists; 4 sociologists; 3 health services/primary care researchers.</p> <p><b>Methods, Page 9: The RESTORE Team</b></p> <p>The research team included research and clinical disciplines, with a wide range of expertise and knowledge of the chosen theoretical framework (Supplementary File 1). Three country teams (Austria, Greece and the Netherlands) had no experience of using NPT. Four team members (MacFarlane, Mair, Dowrick and O'Donnell) had extensive experience of using NPT<sup>33-36</sup> including applying NPT prospectively to complex interventions.<sup>29 37-39</sup> These four team members thus formed the NPT trainers group, leading the development and delivery of the training reported here.</p>                                       |
| <p>What was the extent of their participation and the nature of their roles?</p> | <p>Four members of the team were experienced in the application of NPT to research projects and so took on the role of NPT programme trainers. The other members of the team were fully engaged in th training programme, first by participating in the NPT training programme and second, by their feedback and reflection on the process. Importantly, it was their feedback on the training that led to the continual development and evolution of the training programme.</p> <p>This is reported at various points of the paper, including:</p> <p><b>Methods, Pages 13 – 17:</b> See paper for text.</p> <p><b>Results, Pages 17 – 19:</b> See paper for text.</p> <p><b>Discussion, Page 22:</b> Throughout our training programme, we allowed ample time for concerns to be raised and discussed and for the team to develop solutions. An advantage of the time spent of training was apparent, however, later in the project as we moved onto coding the qualitative data generated across multiple sites. By then, the time spent in early training ensured that the team had a much clearer and consistent view of the constructs and their meaning, leading to a consistency and robustness in coding and analysis.</p> |

1  
2  
3  
4  
5  
6  
7  
8  
9  
10  
11  
12  
13  
14  
15  
16  
17  
18  
19  
20  
21  
22  
23  
24  
25  
26  
27  
28  
29  
30  
31  
32  
33  
34  
35  
36  
37  
38  
39  
40  
41  
42  
43  
44  
45  
46  
47  
48  
49

|                                                                       |                                                                                                                                                                                                                                                                                                                                                                                                                                                                                                                                                                                                                                                                                                                                                                                                                                                                                                                                                                                                                                                                                                                                                                                                                                                                                                                                                                                                                                                                                                                                                                                                                                                                                                                                                                                                                                                                                                                                                                                                                                                                                                                                                                                                                                                                                                                                                                                                                                                                                                                                                                                                                                                                       |
|-----------------------------------------------------------------------|-----------------------------------------------------------------------------------------------------------------------------------------------------------------------------------------------------------------------------------------------------------------------------------------------------------------------------------------------------------------------------------------------------------------------------------------------------------------------------------------------------------------------------------------------------------------------------------------------------------------------------------------------------------------------------------------------------------------------------------------------------------------------------------------------------------------------------------------------------------------------------------------------------------------------------------------------------------------------------------------------------------------------------------------------------------------------------------------------------------------------------------------------------------------------------------------------------------------------------------------------------------------------------------------------------------------------------------------------------------------------------------------------------------------------------------------------------------------------------------------------------------------------------------------------------------------------------------------------------------------------------------------------------------------------------------------------------------------------------------------------------------------------------------------------------------------------------------------------------------------------------------------------------------------------------------------------------------------------------------------------------------------------------------------------------------------------------------------------------------------------------------------------------------------------------------------------------------------------------------------------------------------------------------------------------------------------------------------------------------------------------------------------------------------------------------------------------------------------------------------------------------------------------------------------------------------------------------------------------------------------------------------------------------------------|
| <p>What was the process within and/or methodology of the project?</p> | <p>The methodology of the work was informed by Participatory Learning and Action (PLA), mirroring the use of PLA in the wider RESTORE project itself. Throughout, we collected qualitative data from the RESTORE team on their views of the training sessions, analysed these data thematically and used the findings to inform the design of later training sessions. This is described in the paper:</p> <p><b>Methods, Page 14:</b> This approach, however, proved too prescriptive and over-whelming for team members trying to assimilate knowledge about applying theory to research (see Results). This led to several important modifications in the development of the training. In consultation with our PLA experts (MO'RdeB and TdeB), we incorporated more PLA-informed exercises and approaches into the training.<sup>42</sup> Consequently, later sessions had one or at most two short didactic presentations, with the remaining time spent on participatory exercises. The training content was aligned more closely to the temporal arrangement of the project itself and linked to the over-arching constructs of NPT. Thus, we focused principally on sense-making (coherence) and engagement work (cognitive participation) first, before turning to the actual work undertaken (collective action) and, finally, monitoring and appraisal work (reflexive monitoring) (Figure 2).</p> <p><b>Methods, Pages 16-17: Evaluation of the NPT training content</b></p> <p>Face-to-face training was evaluated qualitatively at the end of each training day. Methods included: written lists of the 3 most positive and 3 most negative features of the training; speed evaluation where each participant was given two minutes to verbally record which aspects of training had, or had not, been effective for them; scoring elements of the training on a Likert scale (e.g. from 1 = very poor to 5 = very good). These data were collected either as short written comments or recorded on a digital recorder. Trainers reviewed the feedback thematically and used it to inform subsequent training sessions. Additional evaluation was conducted approximately three weeks after the first session, when the team were emailed a short set of questions asking what had worked well; what had not worked well; and what they wanted from future training sessions. The results of the evaluations were summarised and fed back at RESTORE Consortium meetings providing researchers with a further opportunity to comment on whether they believed all the key issues or suggestions regarding training had been captured and addressed.</p> |
| <p>What were the project outcomes and/or</p>                          | <p>Training outcomes were increased confidence and comfort amongst the RESTORE research team</p>                                                                                                                                                                                                                                                                                                                                                                                                                                                                                                                                                                                                                                                                                                                                                                                                                                                                                                                                                                                                                                                                                                                                                                                                                                                                                                                                                                                                                                                                                                                                                                                                                                                                                                                                                                                                                                                                                                                                                                                                                                                                                                                                                                                                                                                                                                                                                                                                                                                                                                                                                                      |

|                                                                                                                                                                                                                                                                                           |                                                                                                             |                                                                                                                                                                                                                                                                                                                                                                                                                                                                                       |
|-------------------------------------------------------------------------------------------------------------------------------------------------------------------------------------------------------------------------------------------------------------------------------------------|-------------------------------------------------------------------------------------------------------------|---------------------------------------------------------------------------------------------------------------------------------------------------------------------------------------------------------------------------------------------------------------------------------------------------------------------------------------------------------------------------------------------------------------------------------------------------------------------------------------|
| 1<br>2<br>3<br>4<br>5<br>6<br>7<br>8<br>9<br>10<br>11<br>12<br>13<br>14<br>15<br>16<br>17<br>18<br>19<br>20<br>21<br>22<br>23<br>24<br>25<br>26<br>27<br>28<br>29<br>30<br>31<br>32<br>33<br>34<br>35<br>36<br>37<br>38<br>39<br>40<br>41<br>42<br>43<br>44<br>45<br>46<br>47<br>48<br>49 | emergent actions?                                                                                           | in (i) the use of theory in health services research projects; (ii) understanding of NPT.                                                                                                                                                                                                                                                                                                                                                                                             |
|                                                                                                                                                                                                                                                                                           | What comes next (if the project is on-going)?                                                               | The RESTORE project is now finished. We hope, however, that this paper and our generic recommendations can be used to support training for other health service research projects whether they are using NPT or another theoretical framework. See <b>Discussion, Page 21</b> .                                                                                                                                                                                                       |
|                                                                                                                                                                                                                                                                                           | Consider charts, guidelines, tables, graphics to convey part or all of the project design                   | We have illustrated our data with a number of Figures and Illustrations.                                                                                                                                                                                                                                                                                                                                                                                                              |
|                                                                                                                                                                                                                                                                                           |                                                                                                             |                                                                                                                                                                                                                                                                                                                                                                                                                                                                                       |
|                                                                                                                                                                                                                                                                                           | <b>Convey the experiences of the co-researchers</b>                                                         |                                                                                                                                                                                                                                                                                                                                                                                                                                                                                       |
|                                                                                                                                                                                                                                                                                           | Pay attention to who is writing the article and how their voices and experiences are represented            | Although the lead author (COD) was one of the trainers, the paper has actively involved all members of the team. Therefore, we believe that all the voices of the RESTORE team are represented in this work.                                                                                                                                                                                                                                                                          |
|                                                                                                                                                                                                                                                                                           | Pay attention to who is <i>not</i> writing the article and how their voices and experiences are represented | See above.                                                                                                                                                                                                                                                                                                                                                                                                                                                                            |
|                                                                                                                                                                                                                                                                                           | What were the personal outcomes of the project?                                                             | A principal aim was to increase individuals' knowledge, expertise and confidence both in the use of theory in health services research projects more generally, and in the use of NPT in particular. We believe that we evidence that these personal outcomes were met. In addition, the team's level of understanding and confidence had the unintended consequence of aiding later processes within the RESTORE project such as cross-country qualitative data coding and analysis. |
|                                                                                                                                                                                                                                                                                           |                                                                                                             |                                                                                                                                                                                                                                                                                                                                                                                                                                                                                       |
|                                                                                                                                                                                                                                                                                           | <b>Address the challenges, pitfalls, and limitations of the project</b>                                     |                                                                                                                                                                                                                                                                                                                                                                                                                                                                                       |
|                                                                                                                                                                                                                                                                                           | What were they?                                                                                             | We have discussed the general strengths and limitations of the project in the discussion:<br><b>Discussion, Page 23: Strengths and Limitations</b><br>This training programme in the use of a mid-level theory was developed for a multi-disciplinary team working across 6 European countries; thus, it also had to pay careful attention to both language and cultural differences across the RESTORE research team. The evaluation and careful                                     |

1  
2  
3  
4  
5  
6  
7  
8  
9  
10  
11  
12  
13  
14  
15  
16  
17  
18  
19  
20  
21  
22  
23  
24  
25  
26  
27  
28  
29  
30  
31  
32  
33  
34  
35  
36  
37  
38  
39  
40  
41  
42  
43  
44  
45  
46  
47  
48  
49

|                               |                                                                                                                                                                                                                                                                                                                                                                                                                                                                                                                                                                                                                                                                                                                                                                                                                                                                                                                                                                                                                                                                                                                                                                                                                                                                                                                                                                                                                                                                                                                                                                                                                                                                                                                                                                                                                                                                                        |
|-------------------------------|----------------------------------------------------------------------------------------------------------------------------------------------------------------------------------------------------------------------------------------------------------------------------------------------------------------------------------------------------------------------------------------------------------------------------------------------------------------------------------------------------------------------------------------------------------------------------------------------------------------------------------------------------------------------------------------------------------------------------------------------------------------------------------------------------------------------------------------------------------------------------------------------------------------------------------------------------------------------------------------------------------------------------------------------------------------------------------------------------------------------------------------------------------------------------------------------------------------------------------------------------------------------------------------------------------------------------------------------------------------------------------------------------------------------------------------------------------------------------------------------------------------------------------------------------------------------------------------------------------------------------------------------------------------------------------------------------------------------------------------------------------------------------------------------------------------------------------------------------------------------------------------|
|                               | <p>monitoring of both the development and delivery of the training is a clear strength of this work. That the training programme was acceptable to such a diverse group is another strength. Weaknesses include the small group of researchers involved, although the team did include a range of disciplinary and research backgrounds. The training was focused on the use of only one theoretical framework – NPT – but we believe that the lessons learned from this and the recommendations arising from the work are applicable to other theoretical frameworks.</p>                                                                                                                                                                                                                                                                                                                                                                                                                                                                                                                                                                                                                                                                                                                                                                                                                                                                                                                                                                                                                                                                                                                                                                                                                                                                                                             |
| <p>How were they managed?</p> | <p>A particular challenge in the training programme was managing the different levels of knowledge and expertise within the team. One important lesson was the need to build in time for critical reflection and discussion of the process – this is discussed within the Results section.</p> <p><b>Results, Page 18:</b> Interactive exercises and role play designed to focus on coherence and cognitive participation also spontaneously picked up issues relating to collective action (who would actually do the work; how would it be funded) and reflexive monitoring (how would teams know if professional interpreters had an impact). This served as an important reminder that, even when NPT sensitising questions from researchers were designed to focus on sense-making and engagement, other issues would naturally emerge in the discussion, emphasising the lack of linearity in the application of theory to data generation.</p> <p>On-going telephone and email contact ensured that difficulties and tensions were quickly surfaced, particularly when theory was being applied to fieldwork. Training at month 20 began with an intensive de-briefing, where in-country teams were encouraged to freely discuss their concerns and challenges arising from using NPT. These focussed on two, related, concerns. There was a continued lack of confidence in their knowledge of NPT itself and of being able to correctly map issues and data generated in the field to the NPT constructs. However, the use of visual methods of collecting and displaying data generated during the interactive group exercises, as exemplified in PLA approaches,<sup>42</sup> meant that the trainers could quickly identify a high degree of fidelity in the assignment of data to NPT constructs, thus reassuring the team of their knowledge development (Figure 4).</p> |
| <p>What can we learn?</p>     | <p>We believe that a key message from our work is the set of generic recommendations which could be applied to other training programmes seeking to support the use of theory in health services research projects. These are detailed in the <b>Discussion, pages 21 – 23.</b></p>                                                                                                                                                                                                                                                                                                                                                                                                                                                                                                                                                                                                                                                                                                                                                                                                                                                                                                                                                                                                                                                                                                                                                                                                                                                                                                                                                                                                                                                                                                                                                                                                    |

O'Donnell et al.

BMJOpen-2016-014289

Supporting the use of theory in cross-country health services research using Normalisation Process Theory as an example: A participatory qualitative approach

Reporting Checklist.

Checklist used: Tong A, Sainsbury P, Craig J. Consolidated criteria for reporting qualitative research (COREQ): a 32-item checklist for interviews and focus groups. *International Journal for Quality in Health Care* 2007;19(6):349-57. doi: 10.1093/intqhc/mzm042

| Criteria from Tong et al                                                           | As reported in O'Donnell et al                                                                                                                                                                                                                        |
|------------------------------------------------------------------------------------|-------------------------------------------------------------------------------------------------------------------------------------------------------------------------------------------------------------------------------------------------------|
| <b>Domain 1: Research team and reflexivity.</b>                                    |                                                                                                                                                                                                                                                       |
| Personal Characteristics                                                           |                                                                                                                                                                                                                                                       |
| 1. Interviewer/facilitator. Which author/s conducted the interview or focus group? | Training and qualitative evaluation of training led by Catherine O'Donnell and Anne MacFarlane, assisted by Christopher Dowrick, Frances Mair and Mary O'Reilly de Brun.                                                                              |
| 2. Credentials What were the researcher's credentials? E.g. PhD, MD.               | Catherine O'Donnell (COD): BSc (Hons), PhD, MPH.<br>Anne MacFarlane (AMcF): BA, MA, PhD.<br>Christopher Dowrick (CD): BA, MSc, MD, CQSW, FRCGP, FFPHM.<br>Frances Mair (FM): MBChB, MD, FRCGP, DRCOG.<br>Mary O'Reilly de Brun (MORdeB): BA.Th, M.Th. |
| 3. Occupation What was their occupation at the time of the study?                  | Catherine O'Donnell (COD): Professor of Primary Care Research & Development                                                                                                                                                                           |

|                                                                                                                                                                           |                                                                                                                                                                                                                                                                                                                                                                                                                                                                                                                                                                                                   |
|---------------------------------------------------------------------------------------------------------------------------------------------------------------------------|---------------------------------------------------------------------------------------------------------------------------------------------------------------------------------------------------------------------------------------------------------------------------------------------------------------------------------------------------------------------------------------------------------------------------------------------------------------------------------------------------------------------------------------------------------------------------------------------------|
|                                                                                                                                                                           | <p>Anne MacFarlane (AMcF): Professor of Primary Healthcare Research.</p> <p>Christopher Dowrick (CD): Professor of Primary Medical Care.</p> <p>Frances Mair (FM): Professor of Primary Care Research.</p> <p>Mary O'Reilly de Brun (MORdeB): Research Fellow.</p>                                                                                                                                                                                                                                                                                                                                |
| 4. Gender. Was the researcher male or female?                                                                                                                             | NPT training team consisted of four females; one male.                                                                                                                                                                                                                                                                                                                                                                                                                                                                                                                                            |
| 5. Experience and training. What experience or training did the researcher have?                                                                                          | <p>O'Donnell, MacFarlane, Mair, Dowrick are experienced, senior primary care academics. All four have led substantive programmes of research, using quantitative and qualitative methodologies, exploring a range of primary care issues. All have extensive experience of using NPT including applying NPT prospectively to complex interventions. These four team members thus formed the NPT trainers group, leading the development and delivery of the training reported here.</p> <p>Mary O'Reilly de Brun is an experienced researcher in the use of Participatory Learning in Action.</p> |
| <b>Relationship with participants</b>                                                                                                                                     | In answering these questions, I have regarded 'participants' as the members of the research team who were the focus of the training.                                                                                                                                                                                                                                                                                                                                                                                                                                                              |
| 6. Relationship established Was a relationship established prior to study commencement?                                                                                   | Throughout the project, there was a close working relationship across the entire team of 18 individuals. Regular meetings of the project team, coupled with the training described in this paper, resulted in a strong-knot groups with high levels of confidence in each other. This also engendered a powerful sense of community within the team, which crossed county location, disciplinary background, and level of seniority.                                                                                                                                                              |
| 7. Participant knowledge of the interviewer. What did the participants know about the researcher? e.g. personal goals, reasons for doing the research                     | The NPT trainers, who led on the evaluation, were part of the full RESTORE team. Thus the other members of the RESTORE research team knew NPT trainers well. The purpose of obtaining evaluation feedback was explained to the team and all consented to their feedback being used both to inform future training, and to being used in future publications.                                                                                                                                                                                                                                      |
| 8. Interviewer characteristics. What characteristics were reported about the interviewer/facilitator? e.g. Bias, assumptions, reasons and interests in the research topic | Reasons for collecting evaluation feedback from the research team was explained, and re-iterated, at each training session. The research team knew that the NPT trainers group (COD, AMacF, CD and FM) were interested in developing future training for use with other research groups.                                                                                                                                                                                                                                                                                                          |
| <b>Domain 2: study design</b>                                                                                                                                             |                                                                                                                                                                                                                                                                                                                                                                                                                                                                                                                                                                                                   |
| <b>Theoretical framework</b>                                                                                                                                              |                                                                                                                                                                                                                                                                                                                                                                                                                                                                                                                                                                                                   |

|                                                                                                                                                                                                    |                                                                                                                                                                                                                                                                                                                                                                                                                                                                                                                                                                                                                                                                                                              |
|----------------------------------------------------------------------------------------------------------------------------------------------------------------------------------------------------|--------------------------------------------------------------------------------------------------------------------------------------------------------------------------------------------------------------------------------------------------------------------------------------------------------------------------------------------------------------------------------------------------------------------------------------------------------------------------------------------------------------------------------------------------------------------------------------------------------------------------------------------------------------------------------------------------------------|
| 9. Methodological orientation and Theory. What methodological orientation was stated to underpin the study? e.g. grounded theory, discourse analysis, ethnography, phenomenology, content analysis | The methodological approach was that of Participatory Learning and Action, a participatory and democratic approach to the generation and analysis of data.<br><br>The theoretical framework used was Normalisation Process Theory. This is a mid-range sociological theory concerned with the work that individuals and organisations have to carry out in order to embed and normalise new, complex ways of working into routine practice. NPT operates through four principal constructs or areas of work: coherence (sense-making work); cognitive participation (engagement work); collective action (enacting work); and reflexive monitoring (appraisal work), each with its own set of sub-constructs |
| <b>Participant selection</b>                                                                                                                                                                       |                                                                                                                                                                                                                                                                                                                                                                                                                                                                                                                                                                                                                                                                                                              |
| 10. Sampling How were participants selected? e.g. purposive, convenience, consecutive, snowball                                                                                                    | There was no participant sampling; all 18 members of the RESTORE team participated in the NPT training and in the evaluation of that training.                                                                                                                                                                                                                                                                                                                                                                                                                                                                                                                                                               |
| 11. Method of approach How were participants approached? e.g. face-to-face, telephone, mail, email                                                                                                 | N/A.                                                                                                                                                                                                                                                                                                                                                                                                                                                                                                                                                                                                                                                                                                         |
| 12. Sample size How many participants were in the study?                                                                                                                                           | N/A.                                                                                                                                                                                                                                                                                                                                                                                                                                                                                                                                                                                                                                                                                                         |
| 13. Non-participation How many people refused to participate or dropped out? Reasons?                                                                                                              | All members of the RESTORE team participated in the training and evaluation of that training; there were no drop-outs.                                                                                                                                                                                                                                                                                                                                                                                                                                                                                                                                                                                       |
| <b>Setting</b>                                                                                                                                                                                     |                                                                                                                                                                                                                                                                                                                                                                                                                                                                                                                                                                                                                                                                                                              |
| 14. Setting of data collection Where was the data collected? e.g. home, clinic, workplace                                                                                                          | Data on the evaluation of the training were collected at each face-to-face RESTORE Consortium meeting. These meetings were held in the participating institutions across the 6 RESTORE countries: Austria, England, Greece, Ireland, the Netherlands and Scotland.                                                                                                                                                                                                                                                                                                                                                                                                                                           |
| 15. Presence of non-participants Was anyone else present besides the participants and researchers?                                                                                                 | No.                                                                                                                                                                                                                                                                                                                                                                                                                                                                                                                                                                                                                                                                                                          |
| 16. Description of sample What are the                                                                                                                                                             | The RESTORE research team consisting of 8 project applicants, all senior primary care academics;                                                                                                                                                                                                                                                                                                                                                                                                                                                                                                                                                                                                             |

|                                                                                                   |                                                                                                                                                                                                                                                                                                                                                                                                                                                                                                                                                                                                                                                                                                                                                                                                                                                                                          |
|---------------------------------------------------------------------------------------------------|------------------------------------------------------------------------------------------------------------------------------------------------------------------------------------------------------------------------------------------------------------------------------------------------------------------------------------------------------------------------------------------------------------------------------------------------------------------------------------------------------------------------------------------------------------------------------------------------------------------------------------------------------------------------------------------------------------------------------------------------------------------------------------------------------------------------------------------------------------------------------------------|
| important characteristics of the sample? e.g. demographic data, date                              | and 10 researchers. Professional backgrounds included general practitioners/family doctors; social/cultural anthropologists; sociologists; health services/primary care researchers.                                                                                                                                                                                                                                                                                                                                                                                                                                                                                                                                                                                                                                                                                                     |
| <b>Data collection</b>                                                                            |                                                                                                                                                                                                                                                                                                                                                                                                                                                                                                                                                                                                                                                                                                                                                                                                                                                                                          |
| 17. Interview guide Were questions, prompts, guides provided by the authors? Was it pilot tested? | Data were collected from the RESTORE team in a number of ways – all consistent with the methodological approach on Participatory Learning in Action. As described the paper methods included: written lists of the 3 most positive and 3 most negative features of the training; speed evaluation where each participant was given two minutes to verbally record which aspects of training had, or had not, been effective for them; scoring elements of the training on a Likert scale (e.g. from 1 = very poor to 5 = very good). These data were collected either as short written comments or recorded on a digital recorder. Additional evaluation was conducted approximately three weeks after the first session, when the team were emailed a short set of questions asking what had worked well; what had not worked well; and what they wanted from future training sessions. |
| 18. Repeat interviews Were repeat interviews carried out? If yes, how many?                       | No                                                                                                                                                                                                                                                                                                                                                                                                                                                                                                                                                                                                                                                                                                                                                                                                                                                                                       |
| 19. Audio/visual recording Did the research use audio or visual recording to collect the data?    | Some feedback was recorded on a digital recorder.                                                                                                                                                                                                                                                                                                                                                                                                                                                                                                                                                                                                                                                                                                                                                                                                                                        |
| 20. Field notes Were field notes made during and/or after the interview or focus group?           | No                                                                                                                                                                                                                                                                                                                                                                                                                                                                                                                                                                                                                                                                                                                                                                                                                                                                                       |
| 21. Duration What was the duration of the interviews or focus group?                              | N/A                                                                                                                                                                                                                                                                                                                                                                                                                                                                                                                                                                                                                                                                                                                                                                                                                                                                                      |
| 22. Data saturation Was data saturation discussed?                                                | N/A                                                                                                                                                                                                                                                                                                                                                                                                                                                                                                                                                                                                                                                                                                                                                                                                                                                                                      |
| 23. Transcripts returned Were transcripts returned to participants for comment and/or correction? | N/A. Evaluation comments were collated and feedback to the team at the next face-to-face meeting to permit discussion and clarification.                                                                                                                                                                                                                                                                                                                                                                                                                                                                                                                                                                                                                                                                                                                                                 |



|                                                                                                                                                            |  |                                                                                                                                                                                                 |
|------------------------------------------------------------------------------------------------------------------------------------------------------------|--|-------------------------------------------------------------------------------------------------------------------------------------------------------------------------------------------------|
| <b>Domain 3: analysis and findings</b>                                                                                                                     |  |                                                                                                                                                                                                 |
| <b>Data analysis</b>                                                                                                                                       |  |                                                                                                                                                                                                 |
| 24. Number of data coders How many data coders coded the data?                                                                                             |  | All the evaluation feedback was reviewed by the four members of the training team and the findings summarised into 'what worked', 'what didn't work' and 'what the team would like to do next'. |
| 25. Description of the coding tree Did authors provide a description of the coding tree?                                                                   |  | N/A                                                                                                                                                                                             |
| 26. Derivation of themes Were themes identified in advance or derived from the data?                                                                       |  | N/A                                                                                                                                                                                             |
| 27. Software What software, if applicable, was used to manage the data?                                                                                    |  | No software was used                                                                                                                                                                            |
| 28. Participant checking Did participants provide feedback on the findings?                                                                                |  | Evaluation feedback was presented back to the team for discussion and clarification.                                                                                                            |
| <b>Reporting</b>                                                                                                                                           |  |                                                                                                                                                                                                 |
| 29. Quotations presented Were participant quotations presented to illustrate the themes / findings? Was each quotation identified? e.g. participant number |  | Yes – quotations have a descriptor that is non-identifiable of individuals.                                                                                                                     |
| 30. Data and findings consistent Was there consistency between the data presented and the findings?                                                        |  | Yes.                                                                                                                                                                                            |
| 31. Clarity of major themes Were major themes clearly presented in the findings?                                                                           |  | N/A                                                                                                                                                                                             |
| 32. Clarity of minor themes Is there a description of diverse cases or discussion of minor themes?                                                         |  | N/A.                                                                                                                                                                                            |

1  
2  
3  
4  
5  
6  
7  
8  
9  
10  
11  
12  
13  
14  
15  
16  
17  
18  
19  
20  
21  
22  
23  
24  
25  
26  
27  
28  
29  
30  
31  
32  
33  
34  
35  
36  
37  
38  
39  
40  
41  
42  
43  
44  
45  
46  
47  
48  
49

|  |  |
|--|--|
|  |  |
|  |  |

For peer review only
