# Supplementary material for: Supporting the use of theory in cross-country health services research: a participatory qualitative approach using Normalisation Process Theory as an example
Source: PubMed Central journal article supplement — BMJ Open. 2017 Aug 21;7(8):e014289. doi: 10.1136/bmjopen-2016-014289 (PMC5724160; doi:10.1136/bmjopen-2016-014289), 2017-08-21
Supplement: bmjopen-2016-014289supp001.pdf [file bmjopen-2016-014289supp001.pdf]

**Supplementary File 1. RESTORE team backgrounds and NPT experience**

| <b>Country</b>    | <b>Professional background</b>                                         | <b>Experience of NPT</b>                                            | <b>Country</b>     | <b>Professional background</b> | <b>Experience of NPT</b>                                                                           |
|-------------------|------------------------------------------------------------------------|---------------------------------------------------------------------|--------------------|--------------------------------|----------------------------------------------------------------------------------------------------|
| <b>Austria</b>    |                                                                        |                                                                     | <b>Ireland</b>     |                                |                                                                                                    |
| RESTORE Applicant | Academic general practitioner                                          | New to NPT                                                          | RESTORE Applicant  | Social scientist               | Experienced in use of NPT; part of original group who developed NPT; using NPT in several projects |
| Researcher        | Social scientist                                                       | New to NPT                                                          | Researcher         | Social/cultural anthropologist | Familiar with NPM; New to NPT                                                                      |
|                   |                                                                        |                                                                     | Researcher         | Social/cultural anthropologist | New to NPT                                                                                         |
| <b>England</b>    |                                                                        |                                                                     | <b>Netherlands</b> |                                |                                                                                                    |
| RESTORE Applicant | Academic general practitioner                                          | Experienced in use of NPT; part of original group who developed NPT | RESTORE Applicant  | Academic general practitioner  | New to NPT                                                                                         |
| Researcher        | Social anthropologist                                                  | New to NPT                                                          | RESTORE Applicant  | Academic general practitioner  | New to NPT                                                                                         |
| Researcher        | Social scientist                                                       | New to NPT                                                          | Researcher         | Academic general practitioner  | New to NPT                                                                                         |
|                   |                                                                        |                                                                     | Researcher         | Social/cultural anthropologist | New to NPT                                                                                         |
| <b>Greece</b>     |                                                                        |                                                                     | <b>Scotland</b>    |                                |                                                                                                    |
| RESTORE Applicant | Academic general practitioner; Primary health care services researcher | New to NPT                                                          | RESTORE Applicant  | Health services research       | Experienced in use of NPT; part of NIHR NPT user group; using NPT in several projects              |
| Researcher        | Public health researcher                                               | New to NPT                                                          | RESTORE Applicant  | Academic general practitioner  | Experienced in use of NPT; part of original group who developed NPT; using NPT in                  |

Researcher

Lecturer in social  
work

New to NPT

Researcher

Sociologist

several projects

New to NPT

---
