# Supplementary material for: Supporting the use of theory in cross-country health services research: a participatory qualitative approach using Normalisation Process Theory as an example
Source: PubMed Central journal article supplement — BMJ Open. 2017 Aug 21;7(8):e014289. doi: 10.1136/bmjopen-2016-014289 (PMC5724160; doi:10.1136/bmjopen-2016-014289), 2017-08-21
Supplement: bmjopen-2016-014289supp002.pdf [file bmjopen-2016-014289supp002.pdf]

## Supplementary File 2. NPT training programme

| Training                                         | Session & Duration                 | Content                                                                                                                                                                                                                                                                                                                                                |
|--------------------------------------------------|------------------------------------|--------------------------------------------------------------------------------------------------------------------------------------------------------------------------------------------------------------------------------------------------------------------------------------------------------------------------------------------------------|
| <b>Early project training (Months 1 to 12)</b>   |                                    |                                                                                                                                                                                                                                                                                                                                                        |
| Month 8<br>November<br>2011                      | Training Session 1.<br>(2.5 hours) | <b>Introduction to NPT.</b><br>Development of NPT from ehealth research.<br><br>Overview of NPT and its four main constructs.                                                                                                                                                                                                                          |
|                                                  | Training Session 2.<br>(4.5 hours) | <b>Using NPT in RESTORE.</b><br>Example of using NPT in a qualitative study on use of interpreters in primary care.<br><br>Using NPT in RESTORE – focus on constructs of coherence and cognitive participation<br><br>Participatory Exercise 1: Team asked to think about the issues arising from implementation of paid interpreters in primary care. |
| <b>Mid-project training (Months 13 to 24)</b>    |                                    |                                                                                                                                                                                                                                                                                                                                                        |
| Month 13<br>April 2012                           | Training Session 3.<br>(2.0 hours) | <b>Using NPT in RESTORE.</b><br>Focus of NPT constructs coherence and cognitive participation.<br><br>Participatory Exercise 2: NPT “light” non-RESTORE exercise                                                                                                                                                                                       |
|                                                  | Training Session 4.<br>(2.0 hours) | Focus of NPT constructs coherence and cognitive participation.<br><br>Participatory Exercise 3: NPT RESTORE exercise                                                                                                                                                                                                                                   |
| Month 20<br>November<br>2012                     | Training Session 5<br>(2.0 hours)  | <b>Addressing anxieties.</b><br>Roundtable discussion of arising concerns.<br>Review of why NPT being used and its role in the project.                                                                                                                                                                                                                |
|                                                  | Training Session 6<br>(2.0 hours)  | <b>Using NPT in RESTORE.</b><br>Participatory Exercise 4: NPT RESTORE exercise                                                                                                                                                                                                                                                                         |
| <b>Later training sessions (Months 25 to 48)</b> |                                    |                                                                                                                                                                                                                                                                                                                                                        |
| Month 25<br>April 2013                           | Training session 7<br>(2.5 hours)  | <b>Coding using NPT.</b><br>Preparatory work of coding data extract; face-to-face discussion of coding decisions at Consortium training.<br>Participatory Exercise 5: Discussion of coded extract of RESTORE data.                                                                                                                                     |
| Month 31<br>October 2013                         | Training session 8<br>(1.5 hours)  | <b>Addressing anxieties.</b><br>Roundtable discussion of progress with respect to using NPT                                                                                                                                                                                                                                                            |

|                          |                                     |                                                                                                                                                                                             |
|--------------------------|-------------------------------------|---------------------------------------------------------------------------------------------------------------------------------------------------------------------------------------------|
|                          |                                     | in fieldwork and in coding.                                                                                                                                                                 |
|                          | Training session 9<br>(3 hours)     | <b>Coding using NPT.</b><br>Team reviewed coding exercise conducted in-between face-to-face meetings; discussed Irish data transcript coded by AMacF; and discussed team coding “dilemmas”. |
| Month 38<br>May 2014     | Training session<br>10<br>(3 hours) | <b>Coding using NPT.</b><br>Focused on reviewing where each country team was in relation to NPT coding; connections between fieldwork and NPT; identifying and discussing coding dilemmas.  |
| Month 43<br>October 2014 | Training session<br>11              | Final discussion and clarification of coding framework.                                                                                                                                     |

---
