# Supplementary material for: Supporting the use of theory in cross-country health services research: a participatory qualitative approach using Normalisation Process Theory as an example
Source: PubMed Central journal article supplement — BMJ Open. 2017 Aug 21;7(8):e014289. doi: 10.1136/bmjopen-2016-014289 (PMC5724160; doi:10.1136/bmjopen-2016-014289), 2017-08-21
Supplement: bmjopen-2016-014289supp003.pdf [file bmjopen-2016-014289supp003.pdf]

### Supplementary File 3. Participatory exercises

---

|                                       |                                                                                                                                                                                                                                                                                                                                                                                                                                                                                                                                                                                                                                                                                                                                                                                                                                                            |
|---------------------------------------|------------------------------------------------------------------------------------------------------------------------------------------------------------------------------------------------------------------------------------------------------------------------------------------------------------------------------------------------------------------------------------------------------------------------------------------------------------------------------------------------------------------------------------------------------------------------------------------------------------------------------------------------------------------------------------------------------------------------------------------------------------------------------------------------------------------------------------------------------------|
| Month 8,<br>Participatory Exercise 1  | <p>Consider the following scenario: Your health organisation is about to introduce paid interpreters into the primary care consultation. What NPT-informed questions might you ask to assess how well this is implemented into practice?</p> <p>Participants were directed to the NPT toolkit, with its 16 questions, to help them “think this through”</p>                                                                                                                                                                                                                                                                                                                                                                                                                                                                                                |
| Month 13,<br>Participatory Exercise 2 | <p>NPT “light”: An exercise designed to get the research team thinking about coherence (understanding) and cognitive participation (participation). Using interactive small group work, the team focussed on an example entitle “Circus tent”. Teams were asked to consider if a circus tent could become normalised as team accommodation for future Consortium meetings.</p> <p>While the team debated this, the NPT trainers observed the questions, took notes and assigned these to NPT categories. E.g.</p> <p>Is this something new to me? (Coherence - Differentiation)</p> <p>Do you think this will be helpful to the team? (Coherence – Internalisation)</p> <p>Will everyone agree that this is reasonable? (Cognitive participation - Legitimation)</p> <p>How many of the team buy into this idea? (Cognitive participation = Enrolment)</p> |
| Month 13,<br>Participatory Exercise 3 | <p>NPT RESTORE exercise: Teams asked to consider the issues that might arise when implementing paid interpreters in primary care. Half of the team were assigned roles (GP, nurse, interpreter, migrant patient) and role-played a discussion about using interpreters; other half of team watched, noting key questions and issues that arose, then assigned these to NPT constructs.</p> <p>N.B. The exercise was designed to focus on the constructs of coherence and cognitive participation; however, teams also had to pay attention to collective action and reflexive monitoring.</p>                                                                                                                                                                                                                                                              |
| Month 20,<br>Participatory Exercise 4 | <p>NPT RESTORE exercise: Teams given the G/PI selected by the Irish team. Asked to role play as a practice team with roles assigned to address the question “What levels and barriers will you encounter as you try to implement this guidance in practice?”.</p> <p>Project members took turns at either role playing or noting NPT issue and assigning them to constructs.</p>                                                                                                                                                                                                                                                                                                                                                                                                                                                                           |
| Month 25,<br>Participatory Exercise 5 | <p>NPT RESTORE exercise: Teams pre-circulated a short extract from a training DVD developed by the PLA trainers in which the Irish team role-played a training session with stakeholders. Teams were asked to code the qualitative extract to the main NPT construct. Three external researchers expert in the use of NPT also asked to code the extract, as</p>                                                                                                                                                                                                                                                                                                                                                                                                                                                                                           |

---

well as RESTORE NPT training team. Coding collated and presented, paragraph by paragraph, to team at face-to-face meeting.

---
