# Supplementary material for: Supporting the use of theory in cross-country health services research: a participatory qualitative approach using Normalisation Process Theory as an example
Source: PubMed Central journal article supplement — BMJ Open. 2017 Aug 21;7(8):e014289. doi: 10.1136/bmjopen-2016-014289 (PMC5724160; doi:10.1136/bmjopen-2016-014289), 2017-08-21
Supplement: bmjopen-2016-014289supp004.pdf [file bmjopen-2016-014289supp004.pdf]

#### **Supplementary File 4. Location of NPT presentations on Slideshare**

NPT Unpicked for the RESTORE project (<http://www.slideshare.net/KateODonnell6/npt-unpicked-for-restore-project-57742520>).

NPT training session 2 for RESTORE (<http://www.slideshare.net/KateODonnell6/npt-training-session-2-for-restore>)

NPT in RESTORE (<http://www.slideshare.net/KateODonnell6/npt-in-restore>)

NPT Coding exercise for RESTORE (<http://www.slideshare.net/KateODonnell6/npt-coding-exercise-for-restore-57743364>)
